1 **Ocular biomarker profiling after complement factor I gene therapy in geographic**  
2 **atrophy secondary to age-related macular degeneration**

3

4 Thomas M Hallam<sup>1,2\*</sup>, Emanuela Gardenal<sup>1,2</sup>, Fraser McBlane<sup>3</sup>, GaEun Cho<sup>4</sup>, Lucy  
5 Lee Ferraro<sup>5</sup>, Eva Pekle<sup>1,6</sup>, Darlene Lu<sup>7</sup>, Kate Carney<sup>1,8</sup>, Claire Wenden<sup>1,8</sup>, Hannah  
6 Beadsmoore<sup>1,8</sup>, Sergio Kaiser<sup>9</sup>, Lauren Drage<sup>1,10</sup>, Thomas Haye<sup>1,10</sup>, Iris Kassem<sup>11</sup>,  
7 Nalini Rangaswamy<sup>11</sup>, Ma'en Obeidat<sup>12</sup>, Cyndy Grosskreutz<sup>13</sup>, Magali Saint-Geniez<sup>13</sup>,  
8 David H Steel<sup>14</sup> and Robert E MacLaren<sup>15</sup> on behalf of FOCUS Principal Investigators,  
9 Scott Ellis<sup>1,2</sup>, Claire L Harris<sup>1,2</sup>, Stephen Poor<sup>4\*</sup>, Amy V Jones<sup>1,6\*</sup>

10

11 <sup>1</sup> Gyroscope Therapeutics Ltd, A Novartis Company, United Kingdom

12 <sup>2</sup> Translational Research, Ophthalmology, BioMedical Research, Novartis, United  
13 Kingdom

14 <sup>3</sup> Pharmacokinetic Sciences, Translational Medicine, BioMedical Research, Novartis,  
15 Switzerland

16 <sup>4</sup> Clinical Development, Global Drug Development, Novartis, United States

17 <sup>5</sup> Clinical Development, Global Drug Development, Novartis, Switzerland

18 <sup>6</sup> Biomarker Development, Translational Medicine, BioMedical Research, Novartis,  
19 United Kingdom

20 <sup>7</sup> Biostatistics, Global Drug Development, Novartis, United States

21 <sup>8</sup> Pharmacokinetic Sciences, Translational Medicine, BioMedical Research, Novartis,  
22 United Kingdom

23 <sup>9</sup> Biomarker Development, Translational Medicine, BioMedical Research, Novartis,  
24 Switzerland

25 <sup>10</sup> Cell and Gene Therapies, Technical Research and Development, Novartis, United  
26 Kingdom

27 <sup>11</sup> Ophthalmology, Translational Medicine, BioMedical Research, Novartis, United  
28 States

29 <sup>12</sup> Biomarker Development, Translational Medicine, BioMedical Research, Novartis,  
30 United States

31 <sup>13</sup> Translational Research, Ophthalmology, BioMedical Research, Novartis, United  
32 States

33 <sup>14</sup> Bioscience Institute, Newcastle University, Newcastle Upon Tyne, UK; Sunderland  
34 Eye Infirmary, Sunderland, United Kingdom

NOTE: This preprint reports new research that has not been certified by peer review and should not be used to guide clinical practice.

35 <sup>15</sup> Nuffield Laboratory of Ophthalmology and Oxford Eye Hospital, NIHR Oxford  
36 Biomedical Research Centre, Oxford University Hospitals NHS Foundation Trust,  
37 Oxford, United Kingdom

38

39 The FOCUS Principal Investigator group are listed in the Acknowledgements.

40

41 \*Corresponding authors.

42

43 Keywords: complement system, age-related macular degeneration, gene therapy,  
44 biomarker analysis, vitreous humor

45

46

47

48

49

50

51

52

53

54

55

56

57

58

59

60

61

62

63

64

65

66

67

68

69 **Abstract**

70

71 **Objective:** Complement biomarker analysis in ocular fluid samples from subjects with  
72 geographic atrophy (GA) in a Phase I/II clinical trial of subretinal AAV2 complement  
73 factor I (*CFI*; FI) gene therapy, PPY988 (formerly GT005), to understand target  
74 pharmacokinetics/pharmacodynamics. Clinical findings were subsequently utilized to  
75 investigate the therapeutic dose in an *in vitro* complement activation assay.

76 **Design, setting and participants:** Biomarker data were evaluated from 28 subjects  
77 in FOCUS, a Phase I/II clinical trial evaluating the safety and efficacy of three  
78 ascending doses of PPY988.

79 **Main outcomes and measures:** Vitreous humor (VH), and aqueous humor (AH) from  
80 subjects before surgery and at serial timepoints (week 5 or 12, 36, 96) were evaluated  
81 for changes in levels of intact complement factors I, B and H (FI, FB, FH) components  
82 C3, C4, and C1q and breakdown products (Ba, C3a, C3b/iC3b, C4b) using validated  
83 assays and OLINK® proteomics.

84 A modified *in vitro* assay of complement activation modelling VH complement  
85 concentrations was used to compare PPY988 potency to the approved intravitreal C3  
86 inhibitor pegcetacoplan (Apellis) and complement Factor H (FH).

87 **Results:** An average 2-fold increase in VH FI was observed post-treatment at week  
88 36 and week 96. This correlated with a marked post-treatment reduction in VH  
89 concentration of the FB breakdown product Ba and Ba:FB ratio, but minimal changes  
90 in C3a and C3b/iC3b levels. Variable concordance in complement biomarker levels in  
91 VH versus AH suggest AH is not a reliable proxy for VH for complement activation.  
92 During the experimental comparison of doses, a 2-fold increase of FI achieved in the  
93 vitreous had only a minor effect on the complement amplification loop *in vitro*,  
94 indicating limited impact [IC50: 1229nM]. Pegcetacoplan completely blocks C3a  
95 generation at concentrations much lower than the estimated trough level for monthly  
96 intravitreal injections [IC50: 2nM]. Supplementation with FH in the assay revealed  
97 similar potency to pegcetacoplan [IC50: 6nM].

98 **Conclusions and relevance:** PPY988 subretinal gene therapy may not have  
99 provided sufficient FI protein to meaningfully modulate complement activation to slow  
100 GA growth. Reviewing VH biomarkers is important for understanding target  
101 expression, pathway engagement, and determining optimal dose, thereby informing  
102 future clinical development.

## 103 ABBREVIATIONS

104

|     |      |                                     |
|-----|------|-------------------------------------|
| 105 | AEs  | Adverse events                      |
| 106 | AH   | Aqueous humor                       |
| 107 | AMD  | Age-related macular degeneration    |
| 108 | AP   | Alternative Pathway                 |
| 109 | BL   | Baseline                            |
| 110 | C3   | Complement component 3              |
| 111 | cDNA | Complementary deoxyribonucleic acid |
| 112 | CR1  | Complement receptor 1               |
| 113 | CS   | Complement system                   |
| 114 | DAF  | Decay-accelerating factor           |
| 115 | EDTA | Ethylenediaminetetraacetic acid     |
| 116 | FAF  | Fundus autofluorescence             |
| 117 | FB   | Factor B                            |
| 118 | FD   | Factor D                            |
| 119 | FDA  | Food and Drug Administration        |
| 120 | fdr  | False discovery rate                |
| 121 | FH   | Factor H                            |
| 122 | FI   | Factor I                            |
| 123 | GA   | Geographic atrophy                  |
| 124 | GMP  | Good Manufacturing Process          |
| 125 | IVT  | Intravitreal                        |
| 126 | LLOQ | Lower limit of quantification       |
| 127 | LOD  | Limit of detection                  |
| 128 | LPS  | Lipopolysaccharide                  |
| 129 | MBL  | Mannose binding lectin              |
| 130 | MCP  | Membrane cofactor protein           |
| 131 | NPX  | Normalized protein expression       |
| 132 | PK   | Pharmacokinetics                    |
| 133 | RCA  | Regulators of complement activation |
| 134 | RPE  | Retinal pigment epithelium          |
| 135 | RV   | Rare variant                        |
| 136 | SDS  | Subretinal delivery system          |

|     |      |                                    |
|-----|------|------------------------------------|
| 137 | TP   | Total protein                      |
| 138 | TVSI | Transvitreal surgical intervention |
| 139 | UK   | United Kingdom                     |
| 140 | ULOQ | Upper limit of quantification      |
| 141 | US   | United States                      |
| 142 | VH   | Vitreous humor                     |
| 143 |      |                                    |

## 144 Introduction

145

146 Age-related macular degeneration (AMD) is a leading cause of blindness,  
147 particularly in developed countries. In the United States (US) alone, there are  
148 approximately 18 million individuals aged 40 and above with early-stage AMD, and 1.5  
149 million with late-stage AMD, which includes geographic atrophy (GA) and/or  
150 neovascular AMD <sup>1</sup>. GA is a condition characterized by the progressive loss of  
151 photoreceptors, retinal pigment epithelium (RPE), and underlying choriocapillaris,  
152 resulting in a central scotoma <sup>2</sup>. Reduced vision can significantly impact activities of  
153 daily living and quality of life <sup>3,4</sup>. There have been two recent Food and Drug  
154 Administration (FDA)-approved therapies that inhibit complement activity, with a  
155 modest slowing of GA growth <sup>5,6</sup>. However, they require life-long monthly or bimonthly  
156 intravitreal (IVT) injections and have so far exhibited limited functional efficacy that  
157 present challenges for long term compliance <sup>7</sup>. Therefore, a one-time gene therapy  
158 that provides long-lasting efficacy equivalent to or better than repeated IVT therapies  
159 is a promising avenue for exploration.

160 One such gene therapy, called PPY998 (formerly GT005), is a subretinal gene  
161 therapy that supplements complement factor I (*CFI*; FI) protein in the retinal layers  
162 where atrophy occurs <sup>8</sup>. A Phase II study (HORIZON, NCT04566445) was initiated,  
163 however a decision to stop the PPY988 program was taken by Novartis based on  
164 a recommendation from the independent Data Monitoring Committee following an  
165 overall benefit-risk assessment of available data from the program studies. [Press  
166 release: Novartis AG; September 11th 2023, : <https://www.novartis.com/news/gt005-ppy988-development-program-geographic-atrophy>]. This raises important questions  
167 about whether *CFI* was sufficiently expressed after subretinal gene therapy, whether  
168 there was evidence of modulation of intraocular complement activity, or if this  
169 modulation was sufficient to potentially alter the disease course. Such information is  
170 crucial to the retina community, as there are many companies developing complement  
171 modulating therapies for AMD <sup>9</sup>. Sharing the learnings from the PPY998 program  
172 would improve the risk-benefit analysis for these programs and help understand if new  
173 approaches differentiate from PPY998, justifying further clinical study of complement  
174 targets for GA.

175  
176 The complement system, specifically the alternative pathway (AP), plays an  
177 important role in the development of AMD, and increasing local FI concentration could

178 be a promising approach to regulate ocular complement activity. The AP is a part of  
179 the complement system that constantly surveys for foreign cells and debris and  
180 requires tight regulation to prevent inflammation and self-cell damage <sup>10</sup>. Regulatory  
181 proteins like factor H (FH), decay-accelerating factor (DAF; CD55), membrane  
182 cofactor protein (MCP; CD46), complement receptor 1 (CR1; CD35), and FI help  
183 control the AP, with FI being the only regulatory enzyme <sup>11</sup>. FI, expressed from the *CFI*  
184 gene, cleaves C3b by forming a trimolecular complex with cofactors FH for C3b, and  
185 MCP and CR1 for C3b and C4b <sup>12–18</sup>. Studies have shown that carriers of rare variants  
186 (RV) in *CFI* have increased risk of developing advanced AMD and more rapid disease  
187 progression <sup>19–23</sup>. *CFI* RVs can result in low levels of serum FI (Type I variants) or  
188 normal levels with functional impairment (Type II variants) <sup>24,25</sup>, many examples of  
189 which were observed in Gyroscope’s SCOPE natural history study <sup>26</sup>. Research has  
190 also suggested that doubling serum FI levels may help control complement  
191 overactivation driven by other AMD risk genetic factors mapping to complement genes  
192 <sup>27</sup>. Based on these findings, clinical trials were conducted to explore the potential of  
193 sub-retinal delivery of AAV2-*CFI* as a gene therapy for treating dry AMD <sup>8</sup>.

194 The FOCUS study is a Phase I/II open-label study evaluating the safety, and  
195 dose response of three doses of PPY988 AAV2-*CFI* subretinal gene therapy in GA. To  
196 assess transgene pharmacokinetics and pharmacodynamics, vitreous humor (VH)  
197 and aqueous humor (AH) samples were collected at baseline (BL) and four time points  
198 up to 96 weeks after dosing and were evaluated for exploratory complement  
199 biomarkers. This report shares findings regarding change from baseline in FI and  
200 complement protein levels and activation, over time after vitrectomy and PPY988  
201 administration. Levels of FI achieved in VH from FOCUS subjects were then used in  
202 an *in vitro* simulated human vitreous complement activation assay, to gain insights on  
203 the therapeutic potencies of FI, C3 inhibitor pegcetacoplan (Syfovre, Apellis), and FH.  
204 We also offer critical learnings for other AMD complement gene therapy programs and  
205 a guide for future analyses of complement biomarker data in ocular samples.

206

## 207 **Methods**

208

## 209 **Ethics**

210 The FOCUS study was conducted in accordance with the tenets of the  
211 Declaration of Helsinki and all other local regulations, in accordance with the  
212 International Conference on Harmonization E6 Guidelines for Good Clinical Practice  
213 and with applicable local, state, and federal laws. Institutional review board or ethics  
214 committee approval was obtained, and the study was registered at ClinicalTrials.gov  
215 (reference: NCT03846193) and EudraCT (reference: 2017-003712-39). All subjects  
216 provided written informed consent to participate, and an independent data monitoring  
217 committee provided ongoing oversight.

218

## 219 **Study design**

220 FOCUS is an open-label first in human Phase I/II multicentre clinical trial to  
221 evaluate the safety, and dose response of PPY988 (AAV2-*CFI*)<sup>8</sup>, administered as a  
222 single subretinal injection in subjects with GA secondary to AMD, followed for up to  
223 240 weeks (5 years) post-dosing. Subjects were administered one of three doses to  
224 the study eye under local anaesthesia by a qualified vitreoretinal surgeon: 2E10 viral  
225 genome (vg; low), 5eE10 vg (medium) and 2E11 vg (high). At screening, a saliva  
226 sample was taken from subjects and extracted DNA was analysed for *CFI* RV using  
227 targeted next generation sequencing<sup>21</sup>. Genotyping results were not required at  
228 screening if already available through participation in a previous Gyroscope sponsored  
229 study. The term 'rare' was defined as variants that changed the *CFI* coding sequence,  
230 had  $\leq 1\%$  minor allele frequency in GnomAD non-Finnish Europeans (V2.1.1,  
231 accessed <http://gnomad.broadinstitute.org>), and were previously associated with *CFI*  
232 haploinsufficiency<sup>11</sup>. A detailed description of study design, route of administration,  
233 dose, number of subjects, biomarker matrices, sampling timing and methodology are  
234 provided in **Supplementary Methods and Supplementary Table 1**.

235

## 236 **Complement protein and total protein quantification**

237 AH and VH samples of subjects were taken on the treated eye immediately  
238 prior to subretinal surgery at baseline (BL) and at 5 or 12 weeks, 36, and 96 weeks  
239 post-treatment, as described in detail in **Supplementary Table 1**. Samples were  
240 rapidly frozen at -80 °C and transported frozen for analysis. Prior to analysis, samples



241 were thawed and subjected to centrifugation at 17,000g for 10 minutes at 4°C. Samples  
242 were kept on ice during sample preparation.

243 Complement factors C2, C4b, C5, C5a, factor D, mannose binding lectin (MBL),  
244 FI, C1q, C3b/iC3b, C3, FH, FB and C4 were quantified in AH and VH using the  
245 MILLIPLEX Human Complement Panel 1 and 2 (cat. no. HCMP1MAG-19K and  
246 HCMP2MAG-19K, EMD Millipore Corporation, Billerica, MA) following extensive  
247 quality control and validation of calibration curves. Plates were read using the Luminex  
248 MagPix and xPONENT software (Luminex Corporation, Austin, TX). C5a was omitted  
249 from further analysis as measurements fell under the lower limit for quantification.

250 Complement factors C3a and Ba were quantified in AH and VH using MicroVue  
251 EIA kits (cat. no. A032 and A034, QuidelOrtho Corporation, San Diego, CA) following  
252 manufacturer instructions. Plates were read using a Tecan Sunrise absorbance  
253 microplate reader using the Magellan Tracker data analysis software (Tecan Trading  
254 AG, Switzerland).

255 Each assay was validated and considered fit for purpose. Sample processing  
256 and analyses were conducted in accordance with Good Clinical Laboratory Practice,  
257 the analytes or measurements that did not meet acceptance criteria (coefficient of  
258 variation of 20%, or 30% when results are below the lower limit of quantification but  
259 above limit of detection) were excluded from the final analysis. The number of  
260 successfully sampled subjects for each biomarker at each time-point is reported in

261 **Supplementary Table 2.**

262 Total protein was quantified in AH and VH using the Quant-iT protein assay kit  
263 (cat. no. Q33210, Invitrogen, Thermo Fisher Scientific, Waltham, MA) as per the  
264 manufacturer's instructions. Plates were read using a Varioskan LUX fluorescent  
265 microplate reader using the SkanIt data acquisition software (Thermo Fisher Scientific,  
266 Waltham, MA).

267

## 268 ***In vitro* modelling the ocular complement system and potency assay**

269 The assay was performed using reagents from the Wieslab AP assay kit (cat.  
270 no. COMPLAP330, Svar Life Science AB, Sweden) and purified human serum  
271 complement proteins (Complement Technology Inc., Texas USA). All preparation steps  
272 were performed on ice. Serial dilutions of the test analytes FI, FH and pegcetacoplan  
273 were separately prepared and added to a mix of the complement components C3  
274 (2543.3ng/mL), FB (853.6ng/mL), FH (296.2ng/mL), FI (603.8ng/mL) and Properdin

275 (18.1ng/mL) simulating the final median concentrations measured in the VH baseline  
276 of FOCUS subjects (concentrations of C3, FB, FH, FI are from *CFI* RV negative  
277 population, Properdin concentration is from a limited number of FOCUS subjects from  
278 both populations). The simulated vitreous complement mix was transferred on the  
279 lipopolysaccharide (LPS) coated Wieslab plate on ice. FD was separately added to  
280 the mix, the plate was immediately put at 37°C and incubated for 1 hour. At the end of  
281 the incubation, the solution was transferred into a dilution plate and kept on ice, EDTA  
282 was added to each well to obtain a final 20mM concentration. Ba and C3a generated  
283 in the assay were measured by using the MicroVUE EIA kits (cat. no. A032 and A034,  
284 QuidelOrtho Corporation, San Diego, CA) following the manufacturer instructions. The  
285 ELISA plates were scanned using the Varioskan plate reader and analysed using the  
286 SkanIT software (Thermo Fisher Scientific, Waltham, MA). The *in vitro* FI potency  
287 comparability assay is described in **Supplementary Methods**. The trough level of  
288 pegcetacoplan in the VH after 27 days was calculated by halving the treatment dose  
289 of 15mg/eye 6 times (pegcetacoplan half-life 4.5 days), the number obtained was  
290 converted to µg/mL using an estimated volume of VH of 4 mL<sup>28</sup>.

291

## 292 **Statistics**

293 All subject sample biomarker analyses were performed in R version 4.1.0. The  
294 analysis set consisted of all subjects who received subretinal delivery of PPY998 from  
295 cohorts 1 to 4 and had at least one non-missing biomarker assessment performed at  
296 BL and either week 36 or week 96. Given sparsity of data at week 5 and week 12, the  
297 data were combined, and the average value was used in instances where subjects  
298 had non-missing data from both visits. Concentrations values above the upper limit of  
299 quantification (ULOQ) was set to ULOQ and values below the lower limit of detection  
300 (LOD) were set to LOD. Please see Supplementary Tables 3-4 for limits.

301 Significance testing for the change in protein level from BL to week 36 or week  
302 96 were performed on the differences of log-transformed data with the non-parametric  
303 Wilcoxon rank-sum test. Means and standard error bars are shown in the respective  
304 figures. Correlations between VH and AH sampling, as well as between FI and other  
305 proteins, were summarized with the Spearman's Rank correlation coefficient. As  
306 analyses were exploratory in nature and hypothesis-generating, no adjustments for  
307 multiple testing were performed.

308           For the *in vitro* VH modelling assay, to calculate IC50s, 4-parameter logistic  
309 curves were generated using GraphPad Prism version 10.0.0 for Windows, GraphPad  
310 Software, Boston, Massachusetts USA, [www.graphpad.com](http://www.graphpad.com).

## 311 **Results**

312

### 313 **Biomarker detection in FOCUS subjects that received PPY988**

314 In FOCUS Part 1 and 2 (cohorts 1 to 4), 31 subjects received one of three doses  
315 of PPY988 via the standard subretinal delivery approach (**Supplementary Table 1**). A  
316 total of 97% of the ocular samples expected under the protocol were obtained prior to  
317 early termination of the study which triggered cessation of further ocular fluid sampling.  
318 A total of 88 VH, 63 AH and 45 plasma samples from 30 subjects were obtained at  
319 various timepoints including BL, and 5 or 12, 36 and 96 weeks post-treatment  
320 (**Supplementary Methods and Supplementary Tables 1 and 2**).

321 In FOCUS, PPY988 was well tolerated with no serious ocular AEs, some dose-  
322 related RPE changes in the bleb area were evident and there was no clinically  
323 significant vector-related inflammation. A full account of the FOCUS study safety and  
324 clinical data, as well as full Phase II PPY988 safety, efficacy and biomarker data will  
325 be reported separately following study completion.

326

### 327 **Vitrectomy for subretinal AAV-CFI gene therapy procedure results in sustained** 328 **loss of protein from the VH**

329 To test impact of total vitrectomy performed during transvitreal subretinal  
330 delivery of PPY988 (**Figure 1A and B**) influencing global proteomic matrix changes  
331 and biomarker analyses/interpretation, total protein (TP) measurements were  
332 obtained at BL and each sampling timepoint (according to sample availability). In VH,  
333 a ~30% reduction in TP from baseline was observed at either week 5 or 12 and week  
334 36 (NS,  $P=0.162$ ), with a significant >50% reduction identified at week 96 ( $P=0.033$ ),  
335 while there were minimal changes in AH TP at week 5/12, 36 or 96 (**Figure 1C**).  
336 Because VH TP was reduced post-operatively, we performed TP normalisation to  
337 compare the results with non-normalised data interpretation for VH but not AH.

338

### 339 **AAV2-CFI delivery results in a sustained increase in FI protein level in the VH** 340 **and AH**

341 Transgene expression was measured in VH and AH samples at weeks 5 or 12,  
342 36, and 96 after treatment with PPY988. On average, we identified a 2-fold increase  
343 in VH FI at week 36 compared to baseline, with non-TP normalized baseline  
344 concentrations of 500 ng/mL compared to 1000 ng/mL at week 36 (non-normalised

345 P<0.001; TP normalised increase ~2-fold (P=0.002)) (**Figure 2A, 2B**). The increase in  
346 FI concentration was sustained, with a ~2.5-fold increase in FI observed at week 96.  
347 (mean ~1250 ng/mL) (non-normalised P<0.001; TP normalised increase ~3-fold  
348 (P=0.002)). *CFI* RV (n=5) and non-*CFI* RV ('broad') (n=19) genotype groups  
349 demonstrate comparable magnitudes of absolute FI elevation post-treatment, with the  
350 overall *CFI* RV cohort FI starting concentration ~50% reduced (NS). Elevated FI  
351 expression in AH samples at week 36 (P<0.001) were sustained out to week 96  
352 (P<0.001) (**Figure 2C, 2D**). Lastly, there was a variable response to the three PPY988  
353 doses in both VH and AH with no significant dose effect observed (Figure 2C, 2D).

354

### 355 **Increased FI expression results in a reduction in Ba and Ba:FB in the VH**

356 To test for FI target engagement at the level of formation of the alternative  
357 pathway C3 convertase, we measured Ba and FB concentrations at each sampling  
358 week after subretinal delivery of PPY988. A reduction in Ba in the VH is indicative of a  
359 reduction in C3 convertase formation in the ocular environment. We observed that Ba  
360 levels were reduced by ~2-fold compared to baseline at week 36 and 2.5-fold at week  
361 96 in non-normalised data (week 36: P=0.004; week 96: P=0.003) (**Figure 3A**) and TP  
362 normalised data (week 36: P=0.002; week 96: P=0.038) (**Figure 3B**). To add  
363 confidence to this read-out by accounting for fluctuations in endogenous FB  
364 biosynthesis, ratios of intact complement proteins and their breakdown products were  
365 assessed as in previous studies<sup>29–31</sup>. Ba:FB ratio changes post-treatment reflected  
366 the raw data. When reviewing biomarker levels from both non-normalized and TP  
367 normalized datasets, a significant reduction in Ba:FB was observed at week 36 (both  
368 P<0.001) and at week 96 (non-TP normalized (P=0.001); TP normalized (P=0.033))  
369 (**Figure 3C, 3D**).

370

### 371 **Increased FI expression results in modest alterations in VH and AH complement** 372 **biomarker profiles**

373 To investigate the effect of PPY988 delivery on complement AP and classical  
374 pathway (CP) activity, a panel of biomarkers including FI, C3, FB, FH, C1q, Ba, C3a,  
375 C3b/iC3b, C4 and C4b were measured in the VH and AH (in addition to plasma) at BL,  
376 week 5 or 12, week 36 and week 96. The complete set of concentrations at BL are  
377 reported in the **Supplementary Table 3** (VH), **Supplementary Table 4** (AH), and  
378 **Supplementary Table 5** (plasma). In addition, Ba:FB, C3a:C3 and C3b/iC3b:C3 ratios

379 were calculated at each time-point. Baseline values for each biomarker with  
380 descriptive statistics are reported in **Supplementary Table 3** (VH) and  
381 **Supplementary Table 4** (AH), with baseline and post-treatment pairwise correlations  
382 between FI and biomarkers presented in **Supplementary Figure 1** (VH) and  
383 **Supplementary Figure 2** (AH). Fold changes in complement biomarker concentration  
384 from baseline are presented for each biomarker or ratio at each post-surgery sampling  
385 week in VH non-normalised data (**Figure 4A**), VH TP normalised data (**Figure 4B**) and  
386 AH non-normalised data (**Figure 4C**). In the non-normalised VH dataset, we observed  
387 reductions in Ba and Ba:FB, with a reduction in C1q possibly indicative of reduced  
388 ocular immune cell (e.g. microglial) activation <sup>32</sup> (**Figure 4A**). We detected no  
389 modulation of VH C3a and C4b. Although levels of C3b/iC3b per unit of C3 fall  
390 substantially at week 96 in both non-normalized (P=0.002) and TP-normalized  
391 (P=0.012) analyses (**Supplementary Figure 3**), pairwise correlation analyses reveal  
392 that no biomarkers or ratios were negatively correlated with increasing FI level at week  
393 36 or 96 post-treatment (**Supplementary Figures 1 and 2**). Minimal reduction of CP  
394 activity was indicated by C4b:C4 ratio analysis, however, this was not observed when  
395 normalizing for TP (**Supplementary Figure 4**). VH FB and FH concentrations do not  
396 fluctuate substantially from BL values after treatment with PPY988. Overall, TP  
397 normalisation did not substantially alter the interpretation of VH biomarkers with  
398 broadly similar trends observed (**Figure 4B**).

399

#### 400 **AH sampling is not reflective of VH complement activation profile**

401 Complement biomarker profiling in AH demonstrated increasing concentrations  
402 of a majority of biomarkers (**Figure 4C**), including for Ba, C1q, and C3a (at week 96)  
403 which was discordant with VH sampling data. Whether these components (C1q) and  
404 breakdown products (Ba, C3a) are generated locally, systemically, or diffusely from  
405 the retina or VH is unclear. A similar trend to VH was observed when considering the  
406 increase in AH C3 and associated fall in C3a:C3 and C3b/iC3b:C3 ratios at week 96  
407 in particular. However, in the case of AH, the increase in C3 was also observed at  
408 week 36, suggesting compartmentalization of response of the AH vs the VH. In line  
409 with these data, pairwise correlations between VH and AH levels of Ba, C3a and  
410 C3b/iC3b post-treatment are modest and variable (**Supplementary Figure 5**), with  
411 only FI consistently well correlated between the two ocular compartments.

412

413 **Proteomic analysis on VH using Olink provides supportive evidence for target**  
414 **expression and modest modulation of the complement system**

415 Olink proteomic analysis of the VH samples identified a 2-fold median increase  
416 in week 36 FI levels relative to baseline (**Supplementary Methods, Supplementary**  
417 **Figure 6a**). Further review of differentially expressed proteins revealed trends for  
418 elevation of additional complement components including factor B, properdin and C2  
419 (**Supplementary Figure 6b, Supplementary Table 6**).

420

421 **VH modelling of complement activation reveals inferior potency of FI vs**  
422 **pegcetacoplan**

423 By modelling the components of the VH based on median measurements of  
424 C3, FB, FH, FI (broad cohort measurements) and properdin (all measurements) at  
425 baseline in the FOCUS study, we compared the potency of FI, FH and the C3 inhibitor  
426 pegcetacoplan for their effectiveness in controlling the generation of C3a on an LPS-  
427 coated plate in a simulated ocular environment context (**Figure 5**). In this assay, C3 is  
428 directly activated by O-antigens on LPS thus triggering activation to drive the AP  
429 amplification loop. A wide range of FI, FH and pegcetacoplan concentrations were  
430 titrated through an artificial VH matrix so that comparisons could be made to clinically  
431 relevant levels of both FI and pegcetacoplan. Serum purified FI was revealed to be of  
432 similar potency to FI expressed from Good Manufacturing Practice (GMP)  
433 manufactured PPY988 (**Supplementary Figure 7**). The trough level of pegcetacoplan  
434 at 27 days was estimated using injection dose and half-life information available on  
435 the Syfovre™ prescribing information datasheet. No diffusion data in human was  
436 available so this was not counted in the trough calculation. The concentration obtained  
437 was similar to that reported in the pegcetacoplan rabbit pharmacokinetics (PK) study  
438 and PK/PD prediction study published by Apellis<sup>33,34</sup>. Pegcetacoplan vitreal trough  
439 level was compared to the 1<sup>st</sup> and 3<sup>rd</sup> quartile increase (at week 36 vs BL) in FI  
440 associated with PPY988 delivery. Pegcetacoplan exhibited greater potency than FI,  
441 with complete inhibition of the AP amplification loop and C3a generation at predicted  
442 trough level (~59 µg/mL), whilst FI was observed to have minimal effect at levels of  
443 expression associated with PPY988 after 36 weeks. Overall curves generated by  
444 logistic regression revealed an IC50 of 1229 nM for FI, whilst FH [IC50: 6 nM] was  
445 similar in potency to pegcetacoplan [IC50: 2 nM]. The estimated vitreous trough level  
446 of pegcetacoplan was approximately 100-fold greater than that required for complete

447 inhibition of the AP in this assay. On the other hand, FI was observed to have minimal  
448 effect on AP activation at the levels of PPY988 measured in VH after 36 weeks of  
449 treatment.  
450



## 451 Discussion

452 Gene therapy has been suggested as a promising treatment approach for  
453 slowing macular degeneration in GA secondary to AMD. This manuscript describes a  
454 comprehensive examination of the pharmacokinetic / pharmacodynamic properties of  
455 complement biomarkers in the context of the PPY988 GA subretinal gene therapy  
456 program and provides technical considerations for analyzing biomarker data from  
457 treated subjects. Despite the early termination of the clinical development program,  
458 the PPY988 study achieved notable milestones in the field, including the  
459 implementation of subretinal delivery of gene therapy for GA and the use of serial  
460 vitreous sampling. Herein, we present for the first time an analysis of VH complement  
461 biomarkers at baseline and after surgical delivery of a subretinal gene therapy.  
462 Baseline levels were similar to a previous study of VH complement<sup>35</sup> with potentially  
463 confounding loss of total protein also observed in our study, highlighting the need to  
464 analyze data in the context of changing total protein levels post-vitreotomy. Our  
465 observations reveal consistent elevation of VH FI levels over a 96-week period,  
466 accompanied by reduced detection of the FB activation product Ba and ratios of  
467 Ba:FB, consistent with sustained modulation of complement AP activity in the vitreous  
468 humor compartment. These data confirm that AAV gene therapy has a consistent and  
469 lasting effect. Furthermore, although unpowered due to low N, the effects of FI gene  
470 therapy on complement breakdown product biomarker profiles (Ba (**Figure 2A**) and  
471 C3b/iC3b (**Supplementary Figure 3A**)) appear to be comparable in both *CFI* RV  
472 positive and negative sub-populations, which is counter to the original hypothesis of a  
473 more dramatic effect in a sub-population with lower baseline FI levels<sup>19,20</sup>. However,  
474 due to small sample size this finding should be interpreted with caution. Although the  
475 impact on C3 breakdown products was minimal at week 36, it became significant at  
476 week 96. Elevation of FI and modulation of the broader complement system was also  
477 observed in Olink proteomic profiling of VH samples (**Supplementary Figure 6**),  
478 supporting the complement biomarker findings in the validated panel. Elevated levels  
479 of FI were detected in both AH and VH. PPY988 efflux from the sub-retinal injection  
480 may have transduced cells in the anterior chamber of the eye resulting in an increase  
481 in AH FI concentration. However, the correlation of other complement biomarkers  
482 between VH and AH was inconsistent, in particular, Ba and C1q exhibited disparate  
483 post-treatment trends (**Figure 4**), indicating that AH alone may not be a reliable  
484 biomarker matrix for assessing the activity of complement biomarkers at the target

485 tissues. This cautionary advice should be considered in context of previous reports,  
486 suggesting AH could be a broadly reliable proxy for VH <sup>36</sup>, albeit that only full length  
487 complement proteins were studied therein. To ensure quality control, protein level  
488 normalization was added to the analysis comparing biomarker levels before and after  
489 vitrectomy. Interestingly, the overall conclusions remained consistent regardless of  
490 protein adjustment, which strengthens confidence in the study's findings. After  
491 determining the futility of the Phase II study (HORIZON, NCT04566445), an *in vitro*  
492 assay using clinically relevant levels of complement proteins was conducted to  
493 investigate a possible biomarker-related explanation. The results showed that  
494 pegcetacoplan had higher potency than FI in reducing C3 convertase activity *in vitro*  
495 suggesting that limited *in-vitro* potency of FI may have contributed to the lack of clinical  
496 success at Phase II. Although the translatability of the VH modelling assay to GA  
497 remains to be demonstrated, FI's lower potency suggests that further increasing FI  
498 concentration on its own by gene therapy may not achieve clinically meaningful levels  
499 of C3 inhibition. It should however be noted that intravitreal pegcetacoplan will be at  
500 its highest concentration in the mid-vitreous whereas FI will most likely be at the  
501 highest level in the subretinal space where it is being produced. Hence directly  
502 comparing vitreous levels of each compound may underestimate the activity of FI  
503 compared with pegcetacoplan at the level of the subretinal space. Notably, that FI does  
504 not reduce C3a breakdown to baseline even at supermolecular concentrations  
505 suggests cofactor limitation that might be more pronounced in VH given FH is not in  
506 excess of FI as is the case in blood <sup>27</sup>. Moreover, there are additional cell-bound  
507 cofactors for FI that may be present in retinal tissue that are not present in the VH and  
508 could further alter the kinetics of the assay, such as MCP (CD46) albeit with disease  
509 related changes observed <sup>37</sup>. However, the findings of elevated FI in the VH after sub-  
510 retinally delivered *CFI* gene therapy and changes in complement pathway proteins  
511 post-treatment build confidence that VH matrix is at least partially reflecting the  
512 complement system at the retinal layers and treatment site, and is a valid biomarker  
513 for PK/PD insights in response to treatment.

514 The lack of efficacy in the PPY988 Phase II study does not detract from the  
515 viability of complement activation as an effective target for intervention in GA, given  
516 the therapeutic effect observed for complement inhibitors pegcetacoplan and  
517 avacincaptad pegol (Izervay; Iveric Bio) <sup>5,6</sup>, and this study's observation that  
518 pegcetacoplan achieves a much greater potency than FI *in vitro*. FI had a

519 disproportionately larger effect upon Ba compared to C3a and C3b/iC3b, which may be  
520 due to the lability of C3a, differences in diffusion capabilities of the molecules from the  
521 retina, and possible contribution of C3 concentration from the choriocapillaris as well  
522 as biosynthesis by local immune cells. In addition, we hypothesize FI's capacity to  
523 regulate the production of Ba without causing significant changes in the levels of C3b  
524 and C3a in the fluid phase could be contributed to by regulation of AP tickover,  
525 resulting from binding and activation of FB on water-hydrolysed C3 (C3H<sub>2</sub>O) followed  
526 by release of Ba<sup>10</sup>. Similarly, the intravitreal administration of a neutralizing factor D  
527 Fab, which was found to be ineffective in Phase III trials for GA, was also able to  
528 reduce ocular Ba levels <sup>29</sup>. However, it did not have a significant impact on the  
529 generation of VH C3 breakdown products. In this study, by week 96, there was an  
530 observed rise in the levels of full-length C3 and a corresponding decrease in the ratios  
531 of breakdown products to full length. While the specific implications of this change are  
532 uncertain, it potentially suggests a reduction in C3 consumption, which aligns with the  
533 known activity of FI, but this may be confounded with upregulated biosynthesis of C3  
534 given its acute phase nature <sup>38</sup>. C3 breakdown products only partially diffuse due to  
535 cell-surface adherence. Based on this understanding, we hypothesize that changes in  
536 C3 breakdown products may only become detectable when a certain threshold of  
537 modulation in tissue complement activity is reached. Overall, the data suggests that  
538 fully functional FI is being secreted into the VH, but the regulatory effects on the level  
539 of Ba may be representative of convertase formation in the VH and not the macula  
540 retina/RPE nor the choroid. To validate this hypothesis, one approach would be to  
541 conduct vitreal sampling using an effective drug targeting C3 for GA in a larger cohort.  
542 Further investigations are needed to gain a better understanding of these possibilities.

543 The study has several limitations that should be considered when interpreting  
544 the results. Firstly, the study did not include a control group, which means that the  
545 observed changes in complement biomarkers may not be solely attributed to  
546 transgene expression. Other factors, such as the impact of subretinal gene therapy  
547 administration triggering local inflammation or the effects of total vitrectomy on the  
548 protein environment, could also contribute to these changes. During the study, no  
549 significant safety concerns or adverse events were reported aside from dose-  
550 responsive incidents of RPE changes in the area of the subretinal injection. However,  
551 increased levels of antibodies to the vector and transgene were observed following  
552 treatment <sup>39</sup>. It is important to note that these antibody levels were transient and

553 resolved shortly after treatment, indicating that the observed antibody responses were  
554 not persistent or associated with any significant clinical consequences. It is worth  
555 noting that the subjects included in this early clinical trial had more advanced disease  
556 compared to the typical clinical trial GA population which may impact the  
557 generalizability of the findings to the broader GA population. Additionally, the study had  
558 a relatively small sample size, which increases the risk of bias. Furthermore, the  
559 biomarker conclusions drawn from the study subjects may not be representative of the  
560 subjects treated in the subsequent Phase II study. Therefore, caution should be  
561 exercised when generalizing the findings to larger populations. Despite convincing and  
562 robust genetic links to AMD reported for Type I *CFI* variants<sup>19–22</sup>, this study observed  
563 no difference in biomarker response when comparing *CFI* RV carriers to the broad  
564 population. Interestingly, emerging data have revealed more modest ORs for *CFI* RVs  
565 in progression from early to late AMD<sup>23</sup> and macular thinning was observed in UK  
566 Biobank eyes of carriers <60 years old<sup>40</sup>. Moreover, the long-term effects of  
567 complement therapy on the progression of GA are still uncertain. Another limitation to  
568 consider is the translatability of the *in vitro* VH modelling assay to the disease  
569 processes occurring in GA, and the relevance of the assay to cell-surface complement  
570 activation occurring in the area of GA. The LPS-coated surface used for the VH  
571 modelling assay would most likely result in more acute complement activation than in  
572 the GA retina. Finally, this is a relative potency assay and does not take into  
573 consideration the biodistribution of different modalities and routes of administration.  
574 Despite these limitations, the conclusions drawn from this study are compelling and  
575 hold significant implications for other gene therapy programs. The introduction of the  
576 innovative *in vitro* complement activation assay serves as a valuable benchmark for  
577 gene therapy programs.

578         The superior potency of FH compared to FI highlights the importance of  
579 conducting potency comparisons using *in vitro* assays that reflect physiologically  
580 relevant levels of complement proteins to guide decision-making. This finding opens  
581 promising avenues for further investigation, with potential for engineering of more  
582 active RCA protein truncates and chimeras including CR1, MCP, DAF, FH, and FHR  
583 dimerization domains. To advance gene therapy programs, future research should  
584 focus on building upon the pharmacokinetic / pharmacodynamic findings. It is crucial  
585 to establish tissue concentrations and estimates of the target required for complement  
586 modulation before moving into clinical stages. Pre-clinical assays that can be

587 effectively translated to GA remain elusive. Overall, the role of complement in GA and  
588 the potential benefits of a safe one-time gene therapy in reducing AMD progression  
589 suggest the need for further clinical development of complement gene therapy.

590

591

## 592 **Conflict of interest**

593 The authors declare the following competing interests: Drs T Hallam, E  
594 Gardenal, A Jones, S Ellis, E Pekle, K Carney, and L Drage and Ms C Wenden, Ms H  
595 Beadsmoore and Mr T Haye are employees of Gyroscope Therapeutics Limited, a  
596 Novartis company. Drs Poor, McBlane, Kaiser, Lu, Kassem, Cho, Ferraro,  
597 Rangaswamy, Obeidat, Saint-Geniez, and Grosskreutz are employees of Novartis. T  
598 Hallam is an author on a pending patent for factor I trimolecular complex  
599 building/screening of complement changes.

600 Claire L Harris (In previous three years: consultant: Q32 Bio, Biocryst; Grant  
601 funding: Ra Pharmaceuticals). CLH was an employee of Gyroscope Therapeutics  
602 Limited, a Novartis Company.

603 Professor David H Steel (Consultant: Alcon, Gyroscope, BVI, DORC, Eyepoint,  
604 Complement therapeutics, Alimera; Grant funding: Bayer, Alcon, Roche, DORC, BVI,  
605 Boehringer, Gyroscope Therapeutics Ltd).

606 Professor Robert E MacLaren (Consultant: Biogen, AGTC, and Beacon  
607 Therapeutics; Grant funding: Biogen). REM is also a named inventor on the Biogen  
608 BIIIB112 patent licensed by the University of Oxford.

609

## 610 **Acknowledgements**

611 The authors thank all the subjects who took part in the FOCUS study, and  
612 Gyroscope Therapeutics and Novartis colleagues past and present who made this  
613 possible.

614 The authors thank Michael Wittpoth, Les McGuire, Jayashree Sahni, and Maria  
615 Costa from Novartis for assistance in providing critical comments on the manuscript,  
616 and Shyamtanu Datta for assistance with the *in vitro* modelling.

617

## 618 **FOCUS principal investigators**

619

620 Dr Claire Bailey

621 *Bristol Eye Hospital*

622 *Bristol, United Kingdom (UK)*

623

624 Professor Sobha Sivaprasad

625 *Moorfields Eye Hospital - NHS Foundation Trust London, UK*

626

627 Professor David Steel

628 *Sunderland Eye Infirmary*

629 *Sunderland, UK*

630

631 Dr Tsveta Ivanova

632 *Manchester Royal Eye Hospital*

633 *Manchester, UK*

634

635 Dr Paulo Stanga

636 *The Retina Clinic London*

637 *London, UK*

638

639 Dr Kamin Xue

640 *Nuffield Laboratory of Ophthalmology University of Oxford & Oxford Eye Hospital,*

641 *Oxford University Hospitals NHS Foundation Trust*

642 *Oxford, UK*

643

644 Dr Peter Charbel Issa

645 *Nuffield Laboratory of Ophthalmology*

646 *University of Oxford & Oxford Eye Hospital, Oxford University Hospitals NHS*

647 *Foundation Trust*

648 *Oxford, UK*

649

650 Dr Jared Neilsen

651 *Wolfe Eye Clinic West Des Moines, Indianapolis, USA*

652

653 Dr Jeff Heier

654 *Ophthalmic Consultants of Boston*

655 *Boston, USA*

656

657 Dr Arshad Khanani

658 *Sierra Eye Associates*

659 *Reno, USA*

660

661 Dr Christopher Riemann

662 *Cincinnati Eye Institute Cincinnati, Ohio, US*

663

664 Dr Alan Ho

665 *Mid-Atlantic Retina, Wills Eye Hospital Philadelphia, Pennsylvania, US*

666

667 Dr Raj Maturi

668 *Midwest Eye Institute Northside*

669 *Indianapolis, US*

670

671 Dr Anthony De Beus

672 *Pepose Vision Institute Chesterfield, Missouri, US*

673

674 Prof. Robert E MacLaren

675 *Nuffield Laboratory of Ophthalmology*

676 *University of Oxford & Oxford Eye Hospital, Oxford University Hospitals NHS*

677 *Foundation Trust*

678

679 Dr Nancy Holekamp



680 *Pepose Vision Institute Chesterfield, Missouri, US*

681

682

683

684

## References

685

686

687

688

689

690

691

692

693

694

695

696

697

698

699

700

701

702

703

704

705

706

707

708

709

710

711

712

713

714

1. Wong WL, Su X, Li X, et al. Global prevalence of age-related macular degeneration and disease burden projection for 2020 and 2040: A systematic review and meta-analysis. *Lancet Glob Health*. 2014;2(2). doi:10.1016/S2214-109X(13)70145-1
2. Ambati J, Fowler BJ. Mechanisms of age-related macular degeneration. *Neuron*. 2012;75(1):26-39. doi:10.1016/j.neuron.2012.06.018
3. Patnaik JL, Lynch AM, Pecun PE, et al. The impact of advanced age-related macular degeneration on the National Eye Institute's Visual Function Questionnaire-25. *Acta Ophthalmol*. 2021;99(7):750-755. doi:10.1111/aos.14731
4. Patel PJ, Ziemssen F, Ng E, et al. Burden of illness in geographic atrophy: A study of vision-related quality of life and health care resource use. *Clinical Ophthalmology*. 2020;14:15-28. doi:10.2147/OPHTH.S226425
5. Heier JS, Lad EM, Holz FG, et al. Pegcetacoplan for the treatment of geographic atrophy secondary to age-related macular degeneration (OAKS and DERBY): two multicentre, randomised, double-masked, sham-controlled, phase 3 trials. *The Lancet*. 2023;402(10411):1434-1448. doi:10.1016/S0140-6736(23)01520-9
6. Patel SS, Lally DR, Hsu J, et al. Avacincaptad pegol for geographic atrophy secondary to age-related macular degeneration: 18-month findings from the GATHER1 trial. *Eye (Basingstoke)*. 2023;37(17):3551-3557. doi:10.1038/s41433-023-02497-w
7. Tzoumas N, Riding G, Williams MA, Steel DHW. Complement inhibitors for age-related macular degeneration. *Cochrane*

- 715 *Database of Systematic Reviews.* 2023;2023(6).  
716 doi:10.1002/14651858.CD009300.pub3
- 717 8. Dreismann AK, McClements ME, Barnard AR, et al.  
718 Functional expression of complement factor I following AAV-  
719 mediated gene delivery in the retina of mice and human cells.  
720 *Gene Ther.* 2021;28(5):265-276. doi:10.1038/s41434-021-  
721 00239-9
- 722 9. Dreismann AK, Hallam TM, Tam LCS, et al. Gene targeting as  
723 a therapeutic avenue in diseases mediated by the  
724 complement alternative pathway. *Immunol Rev.*  
725 2023;313(1):402-419. doi:10.1111/imr.13149
- 726 10. Nilsson B, Nilsson Ekdahl K. The tick-over theory revisited: Is  
727 C3 a contact-activated protein? *Immunobiology.*  
728 2012;217(11):1106-1110.  
729 doi:<https://doi.org/10.1016/j.imbio.2012.07.008>
- 730 11. Hallam TM, Sharp SJ, Andreadi A, Kavanagh D. Complement  
731 factor I: Regulatory nexus, driver of immunopathology, and  
732 therapeutic. *Immunobiology.* 2023;228(5).  
733 doi:10.1016/j.imbio.2023.152410
- 734 12. Pangburn MK, Schreiber RD, Muller-Eberhard HJ. HUMAN  
735 COMPLEMENT C3b INACTIVATOR: ISOLATION,  
736 CHARACTERIZATION, AND DEMONSTRATION OF AN  
737 ABSOLUTE REQUIREMENT FOR THE SERUM PROTEIN  
738 fIIH FOR CLEAVAGE OF C3b AND C4b IN SOLUTION\*. *J*  
739 *Exp Med.* 1977;146:257-270.
- 740 13. Medof ME, Iida K, Mold C, Nussenzweig V. UNIQUE ROLE  
741 OF THE COMPLEMENT RECEPTOR CR1 IN THE  
742 DEGRADATION OF C3b ASSOCIATED WITH IMMUNE  
743 COMPLEXES\*. *J Exp Med.* 1982;156:1739-1754.
- 744 14. Whaley K, Ruddy S. Modulation of C3b Hemolytic Activity by  
745 a Plasma Protein Distinct from C3b Inactivator. *Science*  
746 (1979). 1976;193(4257):1011-1013.  
747 doi:10.1126/science.948757

- 748 15. Shiraishi S, Stroud RM. Cleavage products of C4b produced  
749 by enzymes in human serum. *Immunochemistry*.  
750 1975;12(12):935-939. doi:[https://doi.org/10.1016/0019-](https://doi.org/10.1016/0019-2791(75)90256-6)  
751 [2791\(75\)90256-6](https://doi.org/10.1016/0019-2791(75)90256-6)
- 752 16. Liszewski MK, Post TW, Atkinson JP. Membrane Cofactor  
753 Protein (MCP or CD46): Newest Member of the Regulators of  
754 Complement Activation Gene Cluster. *Annu Rev Immunol*.  
755 1991;9(1):431-455.  
756 doi:[10.1146/annurev.iy.09.040191.002243](https://doi.org/10.1146/annurev.iy.09.040191.002243)
- 757 17. Nagasawa S, Stroud RM. Mechanism of action of the C3b  
758 inactivator: Requirement for a high molecular weight cofactor  
759 (C3b-C4bINA cofactor) and production of a new C3b  
760 derivative (C3b'). *Immunochemistry*. 1977;14(11):749-756.  
761 doi:[https://doi.org/10.1016/0019-2791\(77\)90345-7](https://doi.org/10.1016/0019-2791(77)90345-7)
- 762 18. Lachmann PJ, Halbwachs L. *THE INFLUENCE OF C3b*  
763 *INACTIVATOR (KAF) CONCENTRATION ON THE ABILITY*  
764 *OF SERUM TO SUPPORT COMPLEMENT ACTIVATION.*  
765 Vol 21.; 1975.
- 766 19. Kavanagh D, Yu Y, Schramm EC, et al. Rare genetic variants  
767 in the CFI gene are associated with advanced age-related  
768 macular degeneration and commonly result in reduced serum  
769 factor I levels. *Hum Mol Genet*. 2015;24(13):3861-3870.  
770 doi:[10.1093/hmg/ddv091](https://doi.org/10.1093/hmg/ddv091)
- 771 20. Hallam TM, Marchbank KJ, Harris CL, et al. Rare genetic  
772 variants in complement factor i lead to low FI plasma levels  
773 resulting in increased risk of age-related macular  
774 degeneration. *Invest Ophthalmol Vis Sci*. 2020;61(6).  
775 doi:[10.1167/IOVS.61.6.18](https://doi.org/10.1167/IOVS.61.6.18)
- 776 21. Jones A V., MacGregor S, Han X, et al. Evaluating a Causal  
777 Relationship between Complement Factor I Protein Level and  
778 Advanced Age-Related Macular Degeneration Using  
779 Mendelian Randomization. *Ophthalmology Science*.  
780 2022;2(2). doi:[10.1016/j.xops.2022.100146](https://doi.org/10.1016/j.xops.2022.100146)

- 781  
782  
783  
784  
785  
786  
787  
788  
789  
790  
791  
792  
793  
794  
795  
796  
797  
798  
799  
800  
801  
802  
803  
804  
805  
806  
807  
808  
809  
810  
811  
812  
813  
814
22. Jones A V, Curtiss D, Harris C, et al. An assessment of prevalence of Type 1 CFI rare variants in European AMD, and why lack of broader genetic data hinders development of new treatments and healthcare access. *PLoS One*. 2022;17(9):e0272260-.  
<https://doi.org/10.1371/journal.pone.0272260>
  23. Seddon JM, Rosner B, De D, Huan T, Java A, Atkinson J. Rare Dysfunctional Complement Factor I Genetic Variants and Progression to Advanced Age-Related Macular Degeneration. *Ophthalmology Science*. 2023;3(2):100265. doi:<https://doi.org/10.1016/j.xops.2022.100265>
  24. Java A, Baciú P, Widjajahakim R, et al. Functional Analysis of Rare Genetic Variants in Complement Factor I ( CFI ) using a Serum-Based Assay in Advanced Age-related Macular Degeneration . *Transl Vis Sci Technol*. 2020;9(9):37. doi:10.1167/tvst.9.9.37
  25. Hallam TM, Cox TE, Smith-Jackson K, et al. A novel method for real-time analysis of the complement C3b:FH:FI complex reveals dominant negative CFI variants in age-related macular degeneration. *Front Immunol*. 2022;13. doi:10.3389/fimmu.2022.1028760
  26. Hallam TM, Andreadi A, Sharp SJ, et al. Comprehensive functional characterization of complement factor I rare variant genotypes identified in the SCOPE geographic atrophy cohort. *Journal of Biological Chemistry*. 2024;300(7). doi:10.1016/j.jbc.2024.107452
  27. Lachmann PJ, Lay E, Seilly DJ, Buchberger A, Schwaeble W, Khadake J. Further studies of the down-regulation by Factor I of the C3b feedback cycle using endotoxin as a soluble activator and red cells as a source of CR1 on sera of different complotype. *Clin Exp Immunol*. 2016;183(1):150—156. doi:10.1111/cei.12714
  28. Pruijboom-Brees IM, Gupta S, Chemuturi N, et al. International consortium for innovation and quality: An

- 815 industry perspective on the nonclinical and early clinical  
816 development of intravitreal drugs. *Clin Transl Sci.*  
817 2023;16(5):723-741. doi:10.1111/cts.13480
- 818 29. Edmonds R, Steffen V, Honigberg LA, Chang MC. Alternative  
819 Complement Pathway Inhibition by Lampalizumab: Analysis  
820 of Data From Chroma and Spectri Phase III Clinical Trials.  
821 *Ophthalmology Science.* 2023;3(3).  
822 doi:10.1016/j.xops.2023.100286
- 823 30. Nürnberger W, Bhakdi S. Plasma C3d/C3 quotient as a  
824 parameter for in vivo complement activation. *J Immunol*  
825 *Methods.* 1984;74(1):87-91. doi:[https://doi.org/10.1016/0022-](https://doi.org/10.1016/0022-1759(84)90370-3)  
826 [1759\(84\)90370-3](https://doi.org/10.1016/0022-1759(84)90370-3)
- 827 31. Kim AHJ, Strand V, Sen DP, et al. Association of Blood  
828 Concentrations of Complement Split Product iC3b and Serum  
829 C3 With Systemic Lupus Erythematosus Disease Activity.  
830 *Arthritis and Rheumatology.* 2019;71(3):420-430.  
831 doi:10.1002/art.40747
- 832 32. Lynch NJ, Willis CL, Nolan CC, et al. Microglial activation and  
833 increased synthesis of complement component C1q precedes  
834 blood-brain barrier dysfunction in rats. *Mol Immunol.*  
835 2004;40(10):709-716. doi:10.1016/j.molimm.2003.08.009
- 836 33. Machacek M, Deschatelets P, Kim R, Johnson P, Grossi F.  
837 Prediction of duration of C3 inhibition with APL-2 in human  
838 eyes using a PK/PD binding model. *Invest Ophthalmol Vis*  
839 *Sci.* 2017;58:1971.  
840 [https://iovs.arvojournals.org/article.aspx?articleid=2637839&](https://iovs.arvojournals.org/article.aspx?articleid=2637839&resultClick=1)  
841 [resultClick=1](https://iovs.arvojournals.org/article.aspx?articleid=2637839&resultClick=1)
- 842 34. Reid MJ. Ocular Distribution of Pegcetacoplan in Rabbits  
843 Following a Single Intravitreal Injection. *Invest Ophthalmol Vis*  
844 *Sci.* 2021;62.  
845 [https://iovs.arvojournals.org/article.aspx?articleid=2775957&](https://iovs.arvojournals.org/article.aspx?articleid=2775957&resultClick=1)  
846 [resultClick=1](https://iovs.arvojournals.org/article.aspx?articleid=2775957&resultClick=1)
- 847 35. Mandava N, Tirado-Gonzalez V, Geiger MD, et al.  
848 Complement activation in the vitreous of patients with

- 849 proliferative diabetic retinopathy. *Invest Ophthalmol Vis Sci.*  
850 2020;61(11). doi:10.1167/IOVS.61.11.39
- 851 36. Wilson S, Siebourg-Polster J, Titz B, et al. Correlation of  
852 Aqueous, Vitreous, and Serum Protein Levels in Patients With  
853 Retinal Diseases. *Transl Vis Sci Technol.* 2023;12(11).  
854 doi:10.1167/tvst.12.11.9
- 855 37. Vogt SD, Curcio CA, Wang L, et al. Retinal pigment epithelial  
856 expression of complement regulator CD46 is altered early in  
857 the course of geographic atrophy. *Exp Eye Res.*  
858 2011;93(4):413-423.  
859 doi:<https://doi.org/10.1016/j.exer.2011.06.002>
- 860 38. Ricklin D, Reis ES, Mastellos DC, Gros P, Lambris JD.  
861 Complement component C3 – The “Swiss Army Knife” of  
862 innate immunity and host defense. *Immunol Rev.*  
863 2016;274(1):33-58. doi:10.1111/imr.12500
- 864 39. Nielsen J, MacLaren RE, Heier JS, et al. Preliminary Results  
865 from a First-in-human Phase I/II Gene Therapy Study  
866 (FOCUS) of Subretinally Delivered GT005, an Investigational  
867 AAV2 Vector, in Patients with Geographic Atrophy Secondary  
868 to Age-related Macular Degeneration. *Invest Ophthalmol Vis*  
869 *Sci.* 2022;63(7):1504.
- 870 40. Tzoumas N, Kavanagh D, Cordell HJ, Lotery AJ, Patel PJ,  
871 Steel DH. Rare complement factor i variants associated with  
872 reduced macular thickness and age-related macular  
873 degeneration in the UK Biobank. *Hum Mol Genet.*  
874 2022;31(16):2678-2692. doi:10.1093/hmg/ddac060
- 875  
876

## 877 Figure Legends

878

879 **Figure 1.** Surgical delivery of PPY988 AAV2-*CFI*. (A) PPY988 vector design. FI protein  
880 is secreted by cells targeted by AAV2 serotype and containing the cDNA sequence for  
881 wild-type *CFI* (NM\_000204.4) driven by a CAG promoter<sup>8</sup>. (B) Subretinal delivery of  
882 PPY988. (C) Vitrectomy during SR delivery of PPY988 results in loss of total protein  
883 (TP) in the vitreous humor. TP concentration (y-axis, log<sub>2</sub> µg/µL) was measured at  
884 baseline and 5 or 12, 36, and 96 weeks post-surgery (y-axis). Mean +/- SE is shown  
885 by blue bars and lines whilst all subjects are shown by black lines for both vitreous  
886 (left) and aqueous (right) humor. A significant reduction in TP was observed at week  
887 96 in vitreous humor (\*P=0.033). Significance is defined as \*P<0.05. BL = Baseline;  
888 WK= week.

889

890

891 **Figure 2.** Temporal expression of factor I (FI) in vitreous humor (VH) and aqueous  
892 humor (AH) after PPY988 delivery. (A,B) FI levels (y-axis, ng/mL) in VH were  
893 significantly increased at week 36 and 96 post-surgery (x-axis) both when non-  
894 normalised (A) (P=0.001 for both timepoints) and total protein -normalised (B)  
895 (P=0.002 at both timepoints). Mean +/- SE is shown by bars for all (black lines) broad  
896 (blue lines) and CFI RV (green lines) groups. (C,D) FI level (y-axis, ng/mL) for each  
897 subject in the cohort is tracked by week (x-axis) and separated by dose (2E10 vg:  
898 orange lines; 5E10 vg: green lines; 2E11 vg: blue lines) in VH (C) and AH (with  
899 significant increase in AH FI at week 36 and 96 (both P<0.001)) (D), where mean +/-  
900 SE shown by black bars. Significance is defined as \*P<0.05; \*\*P<0.01, \*\*\*P<0.001. N  
901 numbers are shown above X-axis. BL = Baseline; WK= week.

902

903

904 **Figure 3.** Modulation of Ba and Ba:FB by PPY988 delivery. (A,B) Ba concentrations  
905 (Y-axis, ng/mL) in vitreous humor (VH) samples by week post-surgery (X-axis). Mean  
906 +/- SE is shown by bars for all (black lines) broad (blue lines) and CFI RV (green lines)  
907 groups. Significant reductions in Ba were observed at week 36 for both non-  
908 normalised (P=0.004) (A) and total protein (TP) normalised (P=002) (B) data and week  
909 96 for non-normalised data (P=0.003) and TP normalised (P=038). (C,D) Ratios of  
910 Ba:FB concentration (y-axis, ng/mL) were calculated for each subject at each sampling

911 post-surgery week (x-axis). Mean +/- SE is shown by bars for all (black lines) broad  
912 (blue lines) and *CFI* RV (green lines) groups. Significant reductions were identified at  
913 week 36 for both non-normalised ( $P<0.001$ ) (C) and TP normalised ( $P<0.001$ ) (D)  
914 Ba:FB ratios, with a reduction at week 96 for non-normalized ( $P=0.001$ ) and TP  
915 normalized ( $P=0.033$ ) ratios. Significance is defined as \* $P<0.05$ ; \*\* $P<0.01$ ,  
916 \*\*\* $P<0.001$ . N numbers are shown above X-axis. BL = Baseline; WK= week.

917  
918

919 **Figure 4.** Modulation of complement AP and CP biomarkers by PPY988 delivery. Fold-  
920 changes (y-axis) in complement biomarker [FI, C3, FH, FB, C1q, Ba, C3a, C3b/iC3b,  
921 C4b, Ba:FB, C3a:C3, C3b/iC3b:C3] concentrations from baseline at each post-surgery  
922 week (VH: week 5/12, 36 and 96; AH: week 36 and 96; X-axis) are shown in VH with  
923 no normalisation (A), VH with total protein normalisation (B), and AH with no  
924 normalisation. Mean is shown by thick black lines, +/- SE is shown by bars. Individual  
925 subject changes are shown by grey lines. Yellow boxes highlight disparate trends in  
926 VH vs AH biomarkers. BL = Baseline; WK= week.

927  
928

929 **Figure 5.** *In vitro* modelling of vitreous humor complement activation inhibition by FI  
930 vs pegcetacoplan and additional complement regulators. FI (orange), FH (purple), and  
931 pegcetacoplan (blue) were titrated (x-axis, ng/mL) through artificial vitreous  
932 complement matrix on LPS-coated Weislab™ plates and C3a generation was  
933 measured by ELISA (y-axis, ng/mL). C3a is a marker of convertase activity in the  
934 complement activation cascade, the potency of complement inhibitors or regulators is  
935 reflected in lower amount of C3a generated in the assay when testing comparable  
936 concentrations. Mean is shown with +/-SD represented by bars and 4-parameter fit  
937 logistic regression curves are shown by lines. The 1<sup>st</sup>-3<sup>rd</sup> quartile of increased FI  
938 expression from baseline after 36 weeks of PPY988 delivery is shown by orange area.  
939 The calculated trough concentration of pegcetacoplan in eyes 27 days after IVT  
940 injection is shown by the blue vertical line.

941  
942



Figure 1

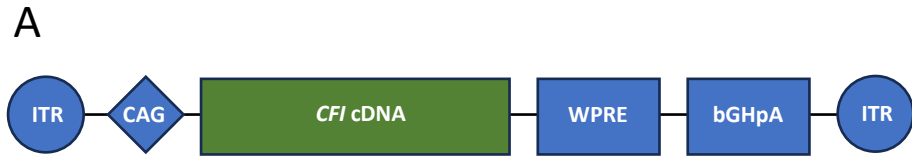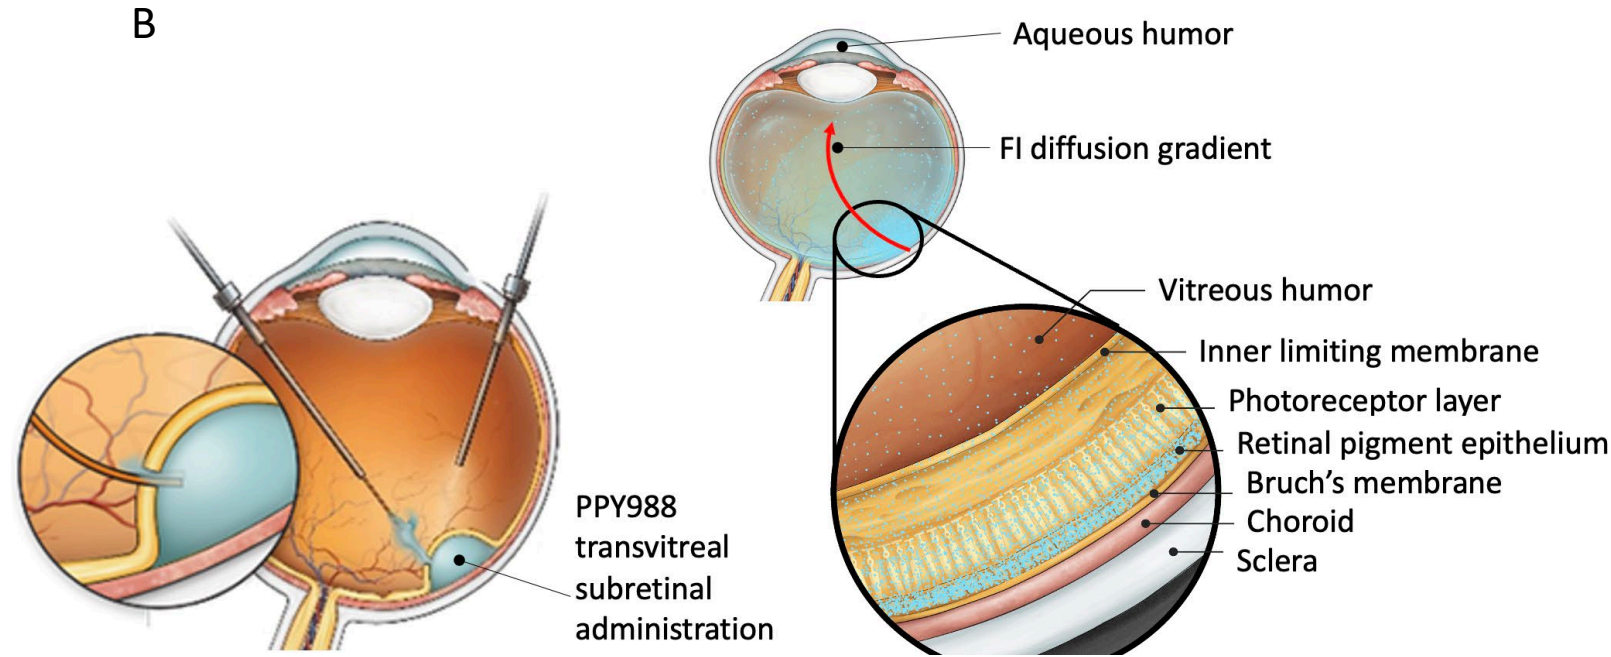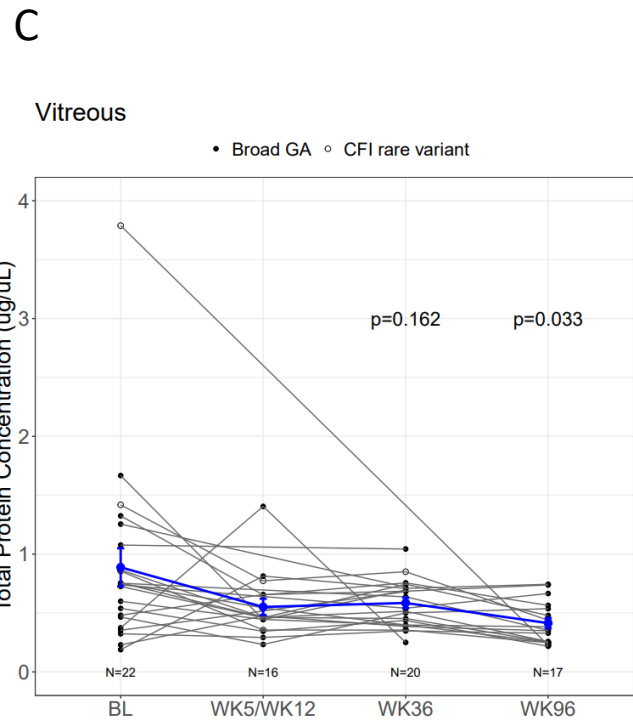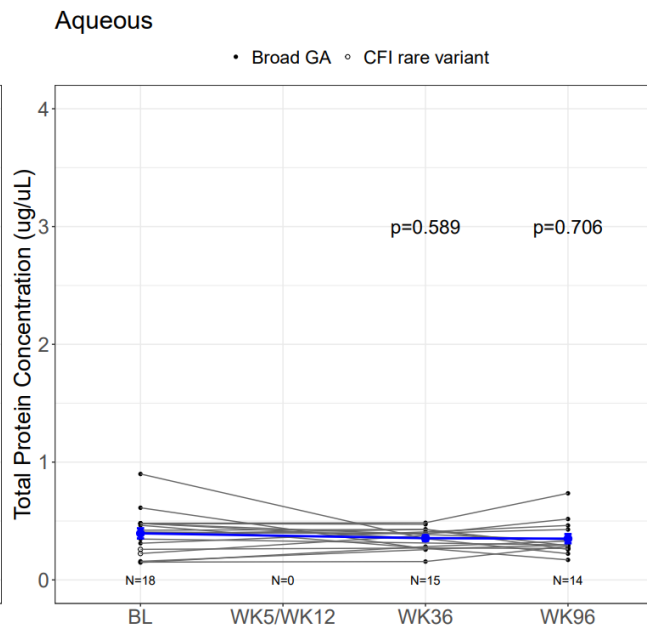

Figure 2

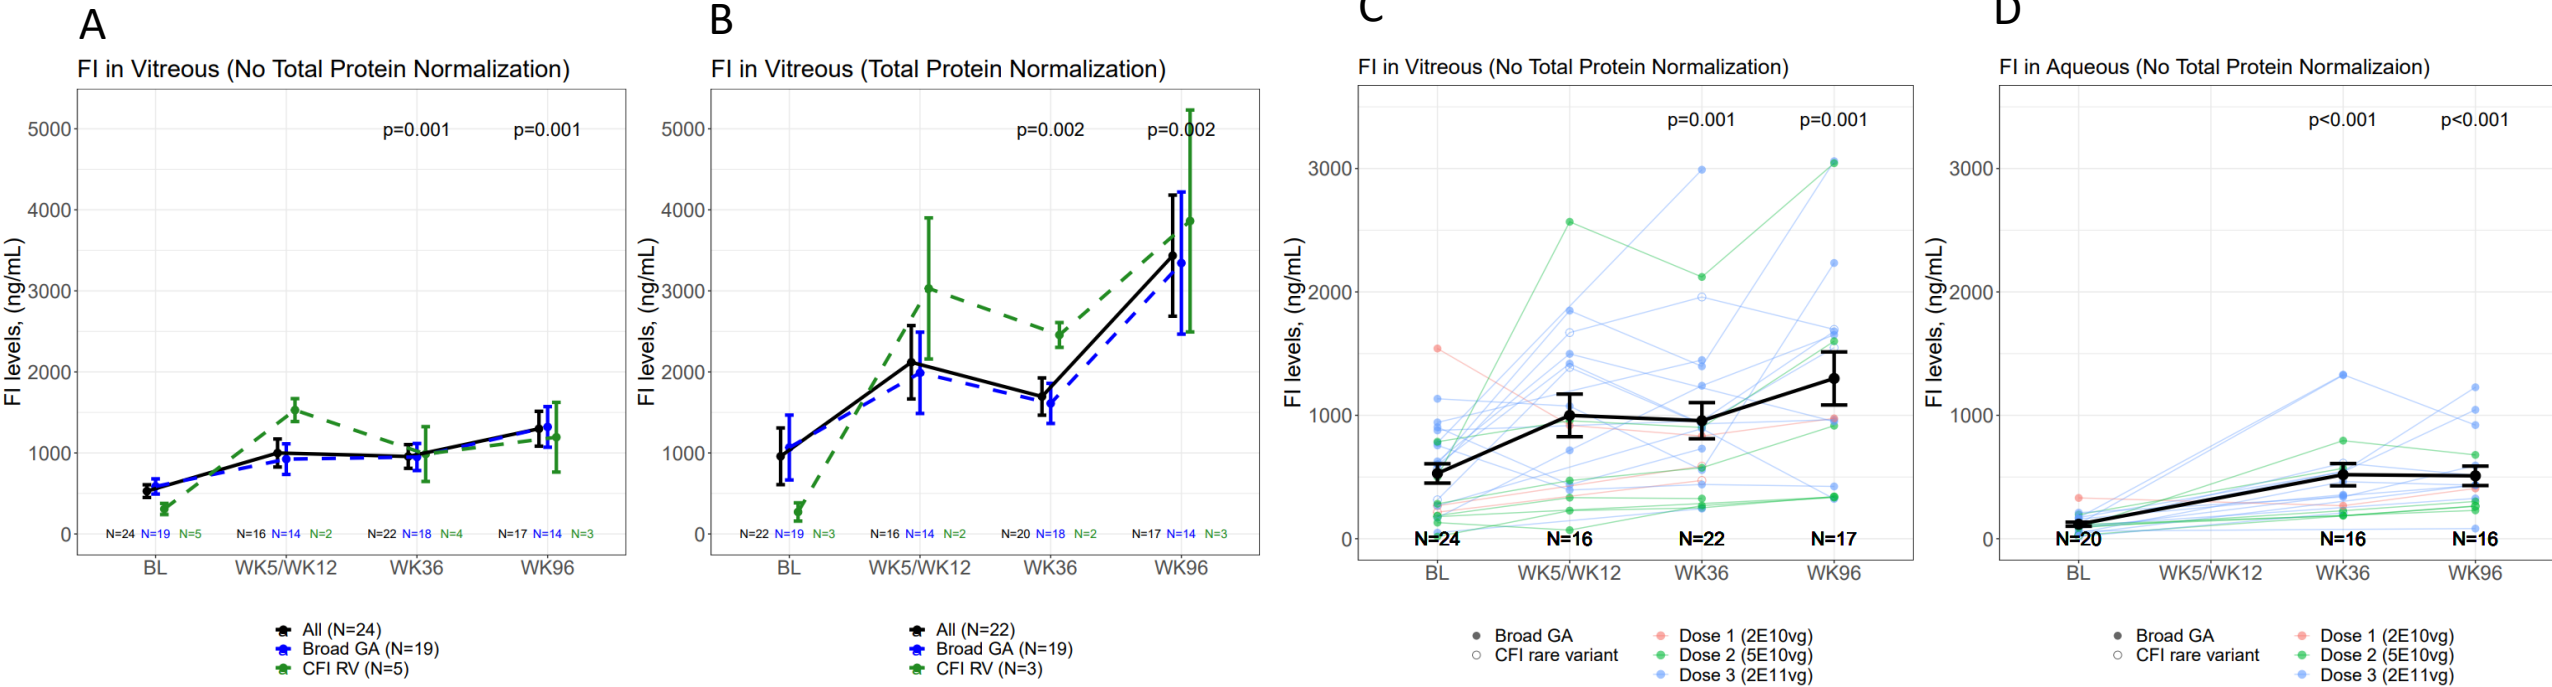

Figure 3

A

Ba in Vitreous (No Total Protein Normalization)

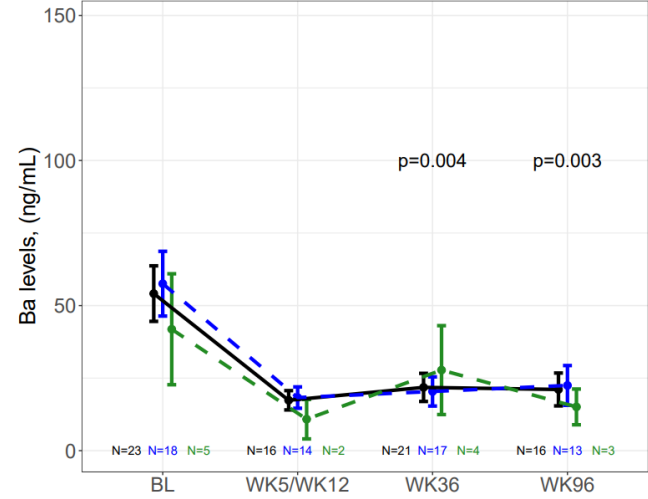

B

Ba in Vitreous (Total Protein Normalization)

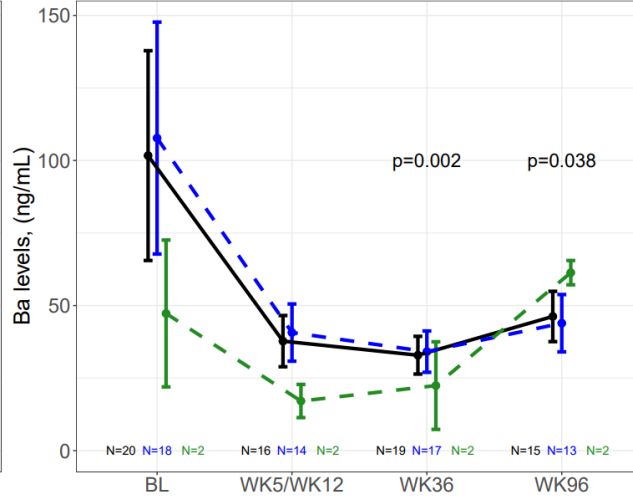

C

Ba:FB in Vitreous (No Total Protein Normalization)

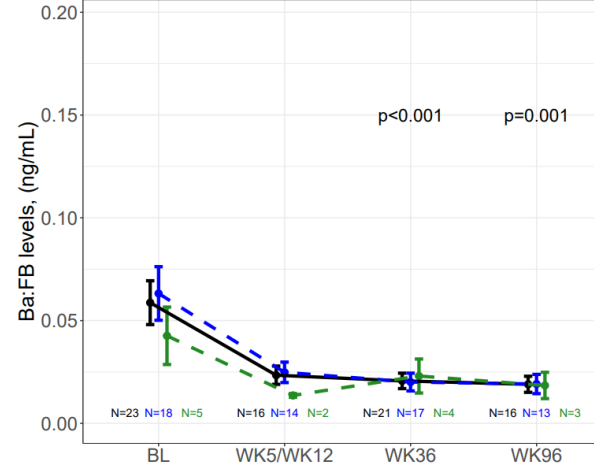

D

Ba:FB in Vitreous (Total Protein Normalization)

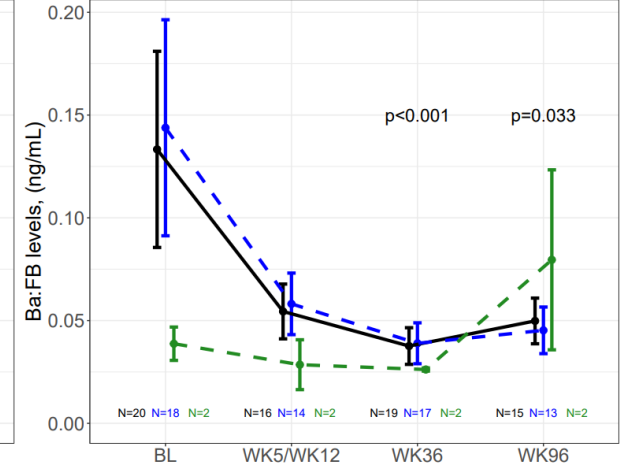

Legend for A:  
 All (N=23)  
 Broad GA (N=18)  
 CFI RV (N=5)

Legend for B:  
 All (N=20)  
 Broad GA (N=18)  
 CFI RV (N=2)

Legend for C:  
 All (N=23)  
 Broad GA (N=18)  
 CFI RV (N=5)

Legend for D:  
 All (N=20)  
 Broad GA (N=18)  
 CFI RV (N=2)

Figure 4

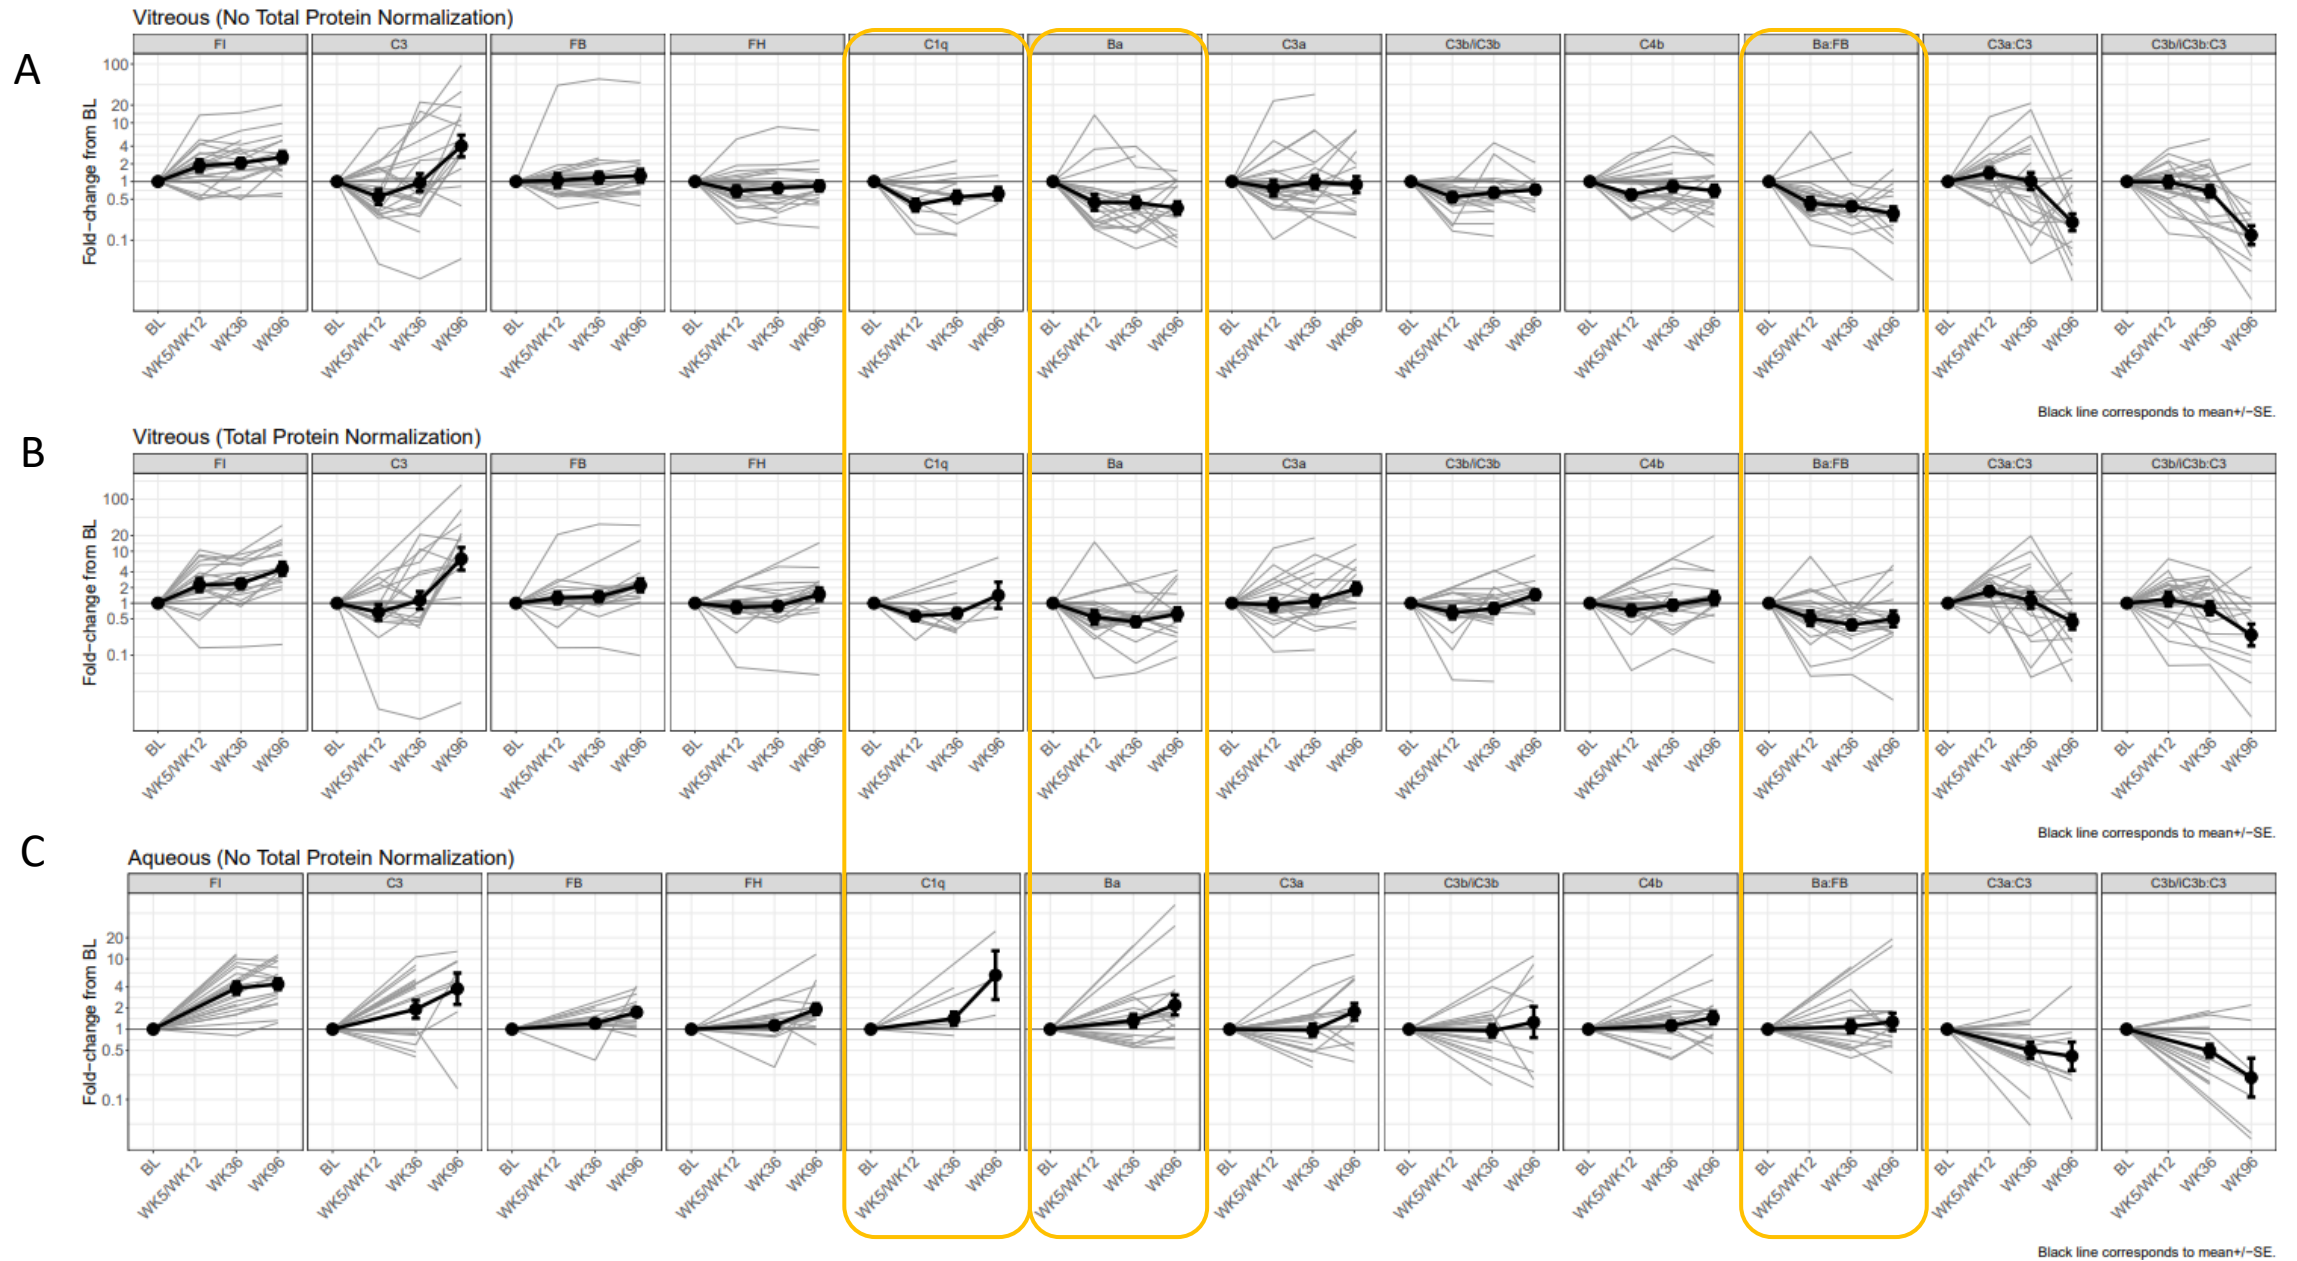

Figure 5

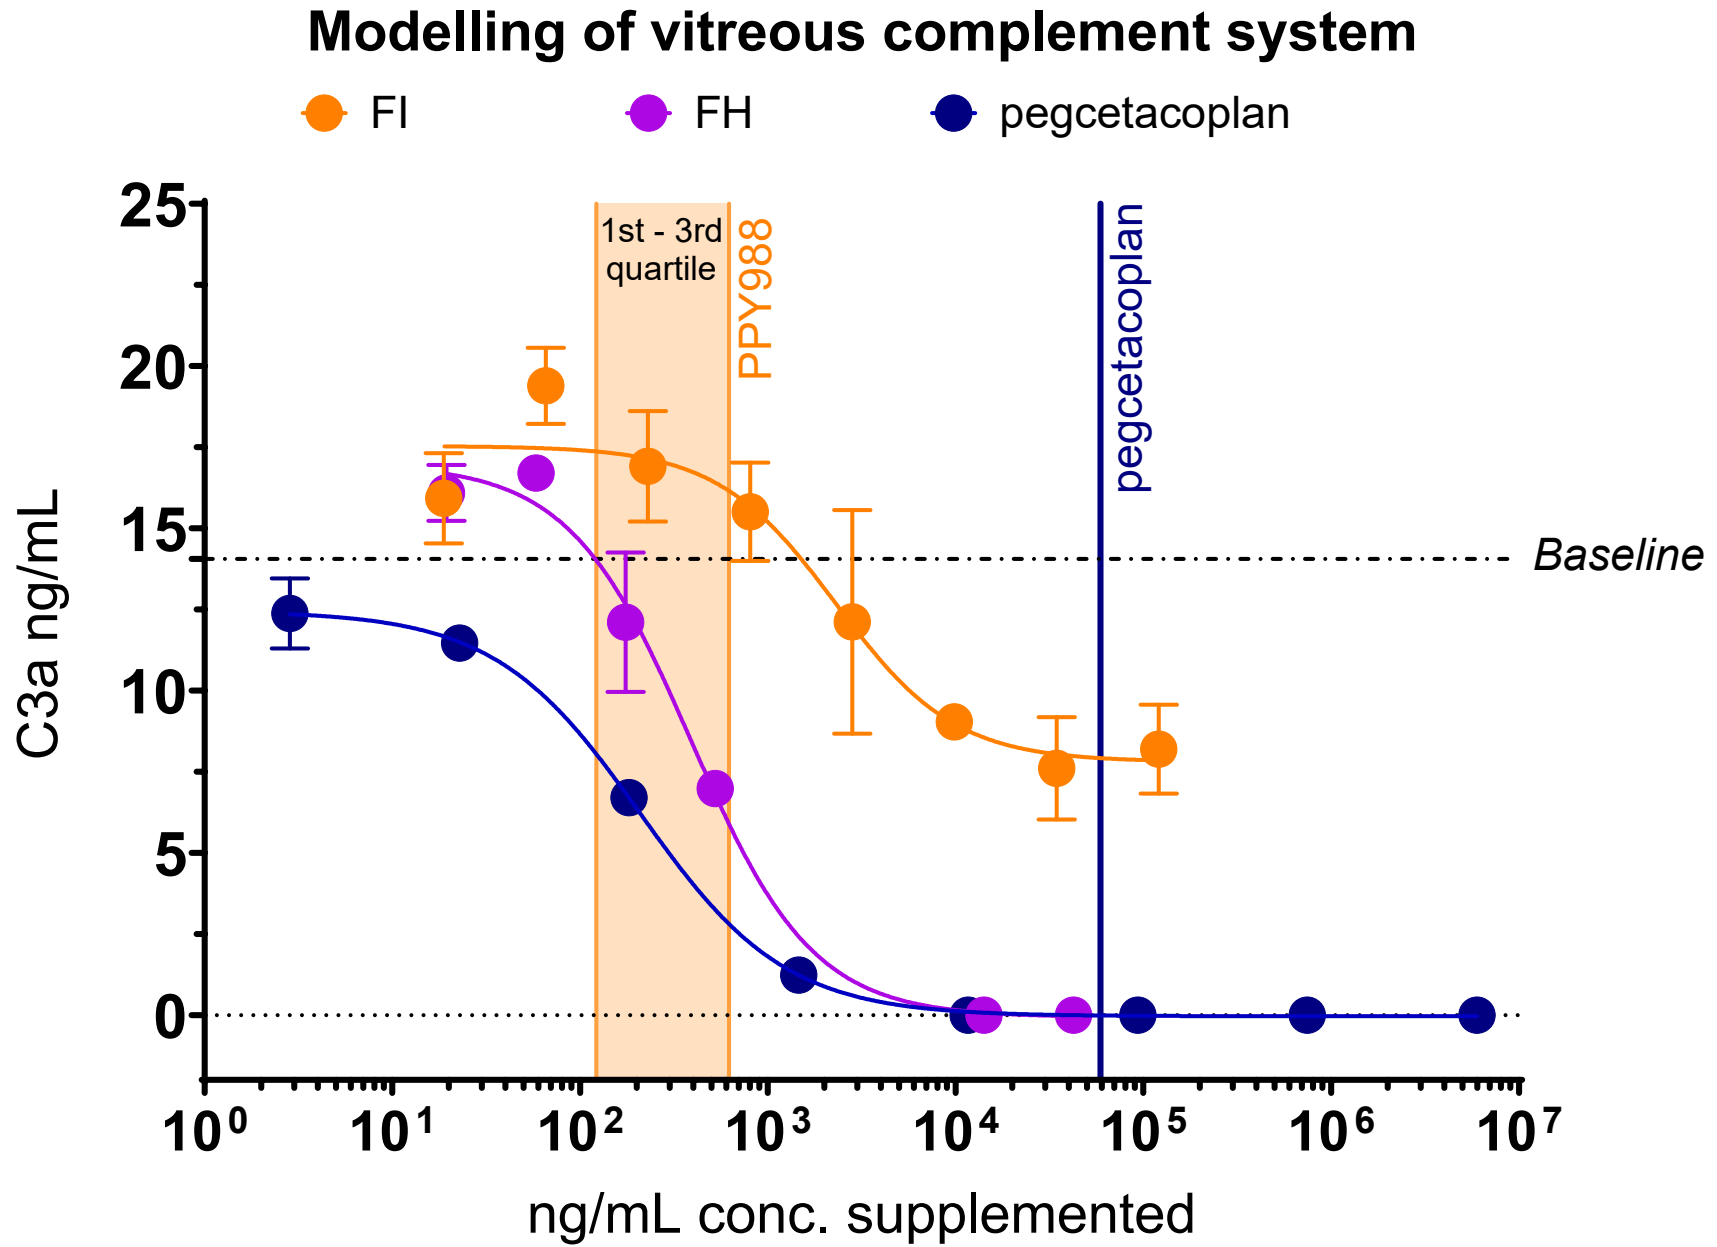

## 1 **Supplementary Methods**

2

### 3 **Study design**

4 FOCUS was conducted at 13 sites over two countries and was sponsored by  
5 Gyroscope Therapeutics, a Novartis company. Key inclusion criteria included a clinical  
6 diagnosis of GA secondary to AMD in the study eye as determined by a retinal  
7 specialist, and a diagnosis of AMD in the contralateral eye (except if subject was  
8 monocular). Study eye GA lesion(s) total size was  $\geq 1.25\text{mm}^2$  and  $\leq 17.5\text{mm}^2$  (cohort 1  
9 to 6) or  $\geq 1.25\text{mm}^2$  (cohort 7), and GA lesions resided completely within the fundus  
10 autofluorescence (FAF) fundus image. Key exclusion criteria included presence of the  
11 following in the study eye; CNV, non-proliferative diabetic retinopathy, glaucomatous  
12 optic neuropathy, or cataract. Subjects were also excluded if they had an active  
13 malignancy or a history of vitrectomy, sub-macular surgery, macular photocoagulation  
14 or previously receiving a gene or cell therapy in the study eye.

15 As outlined in **Supplementary Table 1**, the study had four parts, part 1 (cohorts  
16 1-3); dose escalation, Part 2 (cohort 4); dose expansion, Part 3 (cohorts 5-6); dose  
17 escalation with the Orbit Sub-retinal Delivery System (SDS), and Part 4 (cohort 7);  
18 dose-expansion with the Orbit SDS.

19 PPY988 gene therapy aimed to transduce RPE and PR cells, considered a key  
20 site for AMD pathology and FI production. Parts 1 and 2 (cohorts 1-4) delivered  
21 PPY988 via standard transvitreal subretinal injection (TVSI), previously used for  
22 subretinal gene therapy delivery<sup>1,2</sup>. The surgeon then performed the TVSI procedure  
23 involving a standard 3-port pars plana vitrectomy. The retina was partially detached  
24 through a cannula using buffered salt solution for bleb formation, and a fixed volume  
25 of 0.1mL containing the gene therapy dose was injected into the bleb, which was  
26 expected to flatten after 24 hours.

27 Subjects in Parts 3 and 5 (cohorts 5-7) received PPY988 subretinally via  
28 suprachoroidal cannulation using Orbit SDS, a 510(k) cleared device in the US  
29 (K200325, 14-Jul-2020, US FDA), developed to improve the safety profile of subretinal  
30 injections as compared with TVSI<sup>3</sup>. However, because VH samples were not collected  
31 in Parts 3 to 5, analysis of biomarker data from subjects treated in these cohorts is not  
32 discussed herein.

33 VH, AH and plasma samples were collected from cohort 1 to 4 subjects at BL  
34 prior to surgery, at weeks 12, 36 and 96 after dosing, except for sample collection at

35 week 5 (not week 12) in cohorts 1 and 2, and AH (not VH) was collected for cohort 4  
36 at Week 12.

37 Approximately 25 to 100 $\mu$ L of AH and VH samples were collected under  
38 microscopic visualization. AH samples were collected using a 30G needle attached to  
39 a 1mL syringe. The 30G needle was entered into the anterior chamber through the  
40 temporal limbus using a clear corneal approach. VH samples were collected at BL  
41 using a non-primed 23G vitrectomy probe connected to a 1mL syringe, and post-BL  
42 using a 30G needle through the *pars plana*. Immediately following collection VH and  
43 AH samples were transferred to a sterile collection vial and frozen at  $-80^{\circ}\text{C}$  within 30  
44 minutes.

45 All subjects were assessed for the occurrence of adverse events (AEs) at each  
46 follow-up visit and underwent functional visual and retinal imaging/anatomical  
47 assessments and biological sampling for safety and immunogenicity monitoring at  
48 periodic timepoints up to week 48, considered the primary endpoint timepoint of the  
49 study.

50 It was intended that subjects would be invited to consent to an additional long-  
51 term follow-up assessment until week 240 (5 years). At the time of Phase II study  
52 termination, FOCUS was fully enrolled. As a consequence of the early termination of  
53 the Phase II study, all ocular sampling in FOCUS from that point onward was  
54 terminated, and subjects who had not completed the study assessment window to  
55 week 48 were transferred onto a safety monitoring regimen.

56  
57

## 58 **Olink proteomics**

59 VH samples from 17 subjects were analyzed using the OLINK<sup>®</sup> Target 96  
60 platform (OLINK<sup>®</sup> Proteomics, Uppsala, Sweden) to identify broader pathway changes  
61 affected by subretinal delivery of PPY988. A single measurement was performed for  
62 each sample. The following 4 panels were assessed by Olink: inflammation and  
63 inflammation II, cardiometabolic and neurology. Protein levels were measured on a  
64 relative scale and presented as the normalized protein expression (NPX), which is an  
65 arbitrary unit on a log<sub>2</sub> scale. . Principal component analysis was performed to detect  
66 outlier samples. Olink provides a limit of detection (LOD) for each protein based on  
67 the background noise generated in negative controls (buffer run as a normal sample).  
68 Nonetheless, the Olink protein expression data reported NPX values even for

69 measurements below the LOD. Low abundance proteins were excluded from the  
70 statistical analyses. To identify the proteins changing over time relative to BL, a linear  
71 mixed effect model was used. The model included the following covariates: timepoint,  
72 subject age and sex, sample total protein content and *CFI* RV status (subject ID as  
73 random effect). All analyses were carried out using R version 4.2.3. Nominal p-values  
74 were adjusted using false discovery rate.

75  
76

### 77 ***In vitro* FI potency comparability assay**

78 HEK293 adherent cells with the *CFI* and *CFH* genes knocked out by CRISPR-  
79 Cas9 were transduced with PPY988 (AAV2-*CFI*) vector material produced under good  
80 manufacturing practice (GMP) at 10 different MOIs. After a 24-hour incubation (37°C  
81 at 5% CO<sub>2</sub>) with the vector, the media was replaced and left for a further 48 hours.  
82 Supernatants were collected and stored at -20°C. Supernatants were thawed,  
83 centrifuged (5000xG for 15 mins) then mixed with a fixed volume of human purified  
84 C3b and FH (A114 and A137, Comptech) and incubated for 10 minutes at 37°C. The  
85 mixture was then reduced and labelled by incubating for 5 minutes at 90°C with a  
86 mixture of DTT, SDS buffer and the LIF dye Chromeo P503 (30693, Sigma). A standard  
87 curve of Purified FI (Comptech, Tyler, TX) was made starting at a final concentration  
88 of 4000 ng/mL down to 11 ng/mL. This was diluted in non-transduced control sample  
89 media to ensure the same background matrix for both transduction supernatants  
90 samples and Purified FI standard curve samples. Proteins were separated by CE-SDS  
91 using LIF detection and an adapted version of a published method <sup>4</sup>. The areas of the  
92 peak corresponding 114 kDa alpha prime subunit (normalised to the 75 kDa beta  
93 subunit) are collected for both the Reference (Comptech Purified FI) and the Test  
94 sample (AAV2-*CFI* GMP). The depletion of the peak of interest is plotted using QuBAS  
95 3.0 Statistical Software (Quantics Biostatistics) which performs a parallel line  
96 comparison of the Test compared to the reference and produces a Relative Potency  
97 value corresponding to this analysis. Outliers are statistically identified by a Grubbs  
98 Test and removed automatically from the analysis prior to calculating the Relative  
99 Potency.

100  
101



## 102 **Supplementary References**

103

104 1. Xue K, Groppe M, Salvetti AP, MacLaren RE. Technique of retinal gene therapy:  
105 delivery of viral vector into the subretinal space. *Eye*. 2017;31(9):1308-1316.  
106 doi:10.1038/eye.2017.158

107 2. MacLaren RE, Groppe M, Barnard AR, et al. Retinal gene therapy in patients  
108 with choroideremia: initial findings from a phase 1/2 clinical trial. *The Lancet*.  
109 2014;383(9923):1129-1137. doi:[https://doi.org/10.1016/S0140-6736\(13\)62117-](https://doi.org/10.1016/S0140-6736(13)62117-0)  
110 0

111 3. Chang S. LXII Edward Jackson Lecture: Open Angle Glaucoma After Vitrectomy.  
112 *Am J Ophthalmol*. 2006;141(6). doi:10.1016/j.ajo.2006.02.014

113 4. Santos M. *Sensitive AAV Capsid Protein Impurity Analysis by CE Using Easy to*  
114 *Label Fluorescent Chromeo Dye P503.*; 2019.

115

# S Figure 1. VH Complement Biomarker pairwise correlation analysis

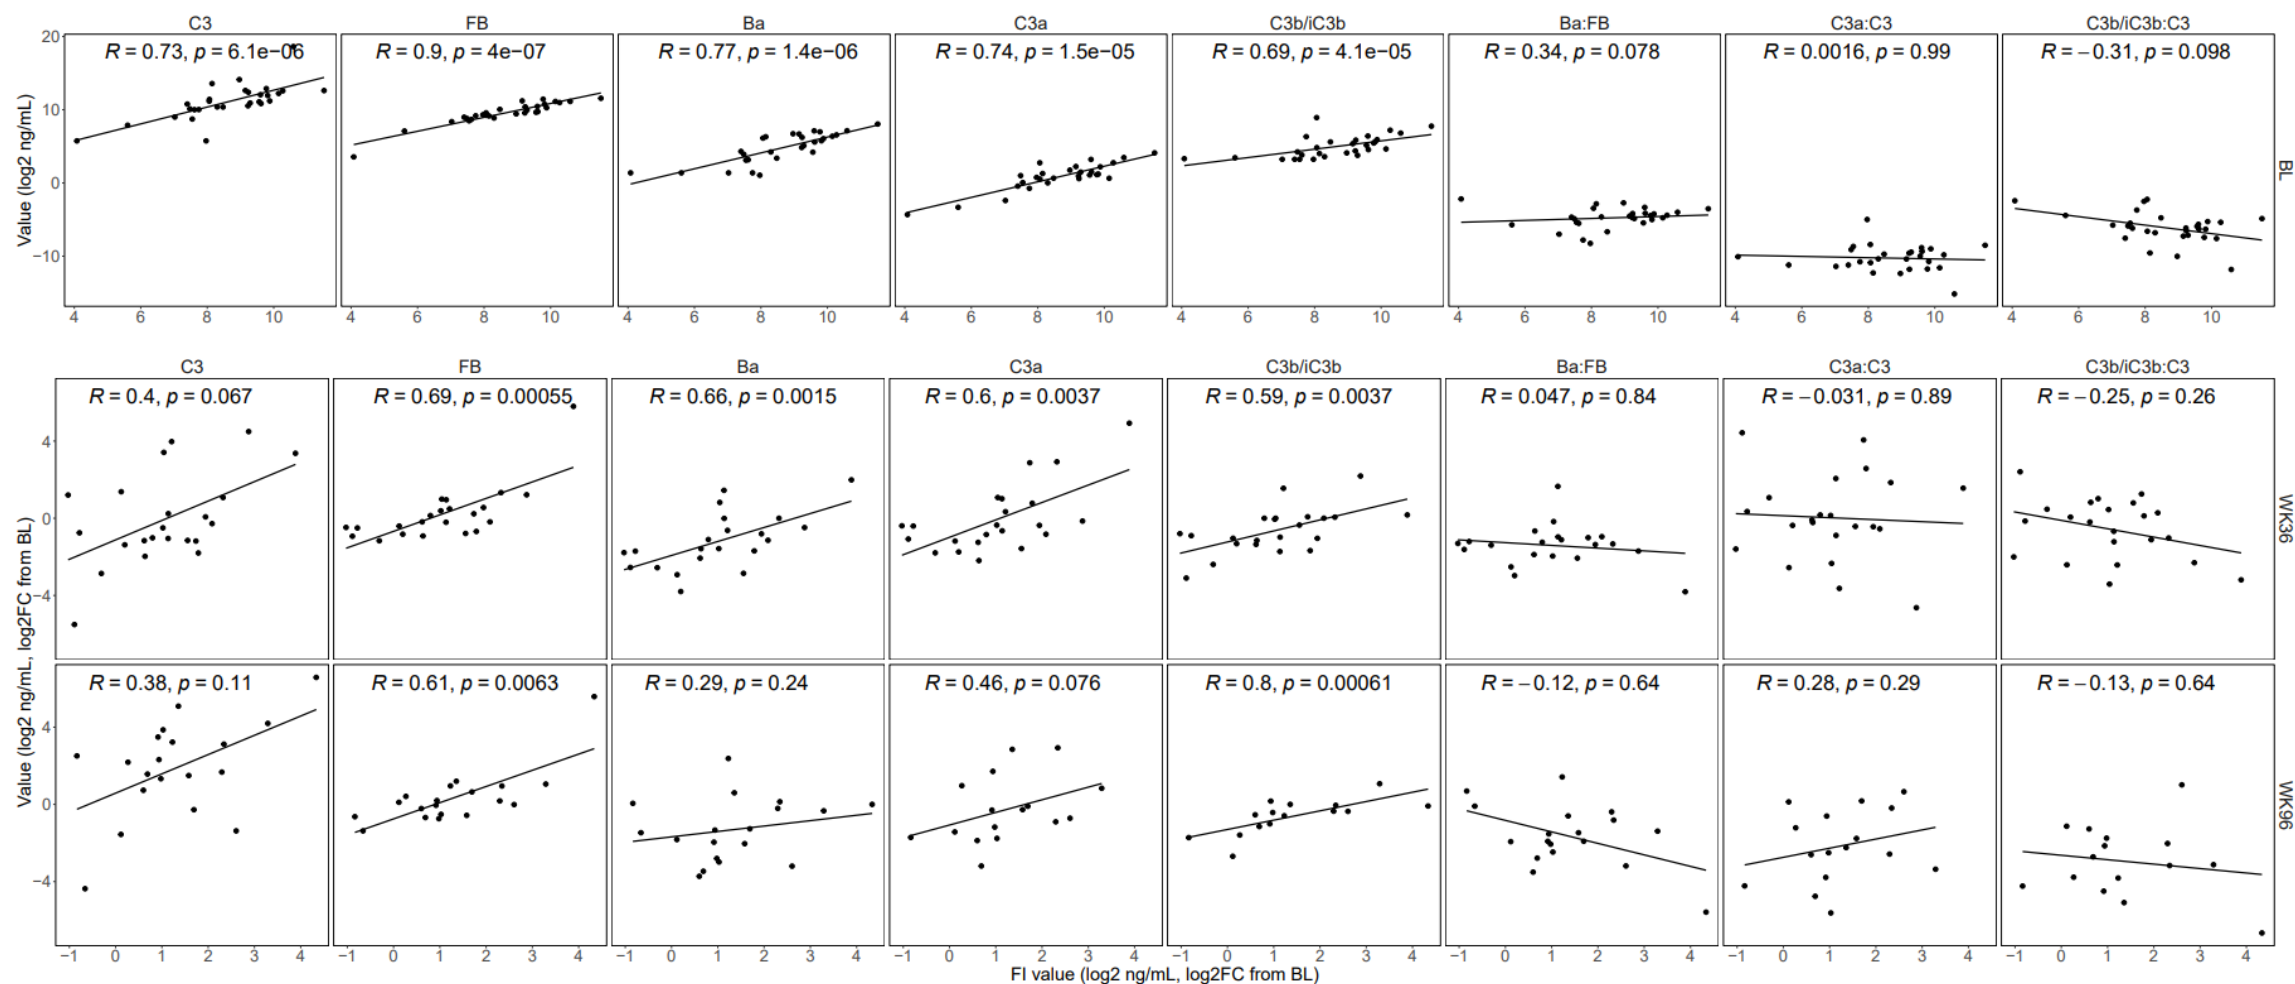

**Supplementary Figure 1.** VH complement biomarker pairwise correlation analysis. Pairwise correlation analysis of FI with intact complement proteins and breakdown products and ratios in the vitreous at baseline, week 36 and week 96 from subjects in cohorts 1 to 4. FI concentrations are shown by the x-axis while biomarker concentrations and ratios are shown by the y-axis. Correlations at BL are determined using log<sub>2</sub> ng/mL concentrations, correlations at weeks 36 and 96 are determined using log<sub>2</sub> fold change from BL. BL = Baseline; WK = week; FC = Fold Change; R = Spearman Correlation Coefficient; p = p-value.

## S Figure 2. AH Complement Biomarker pairwise correlation analysis

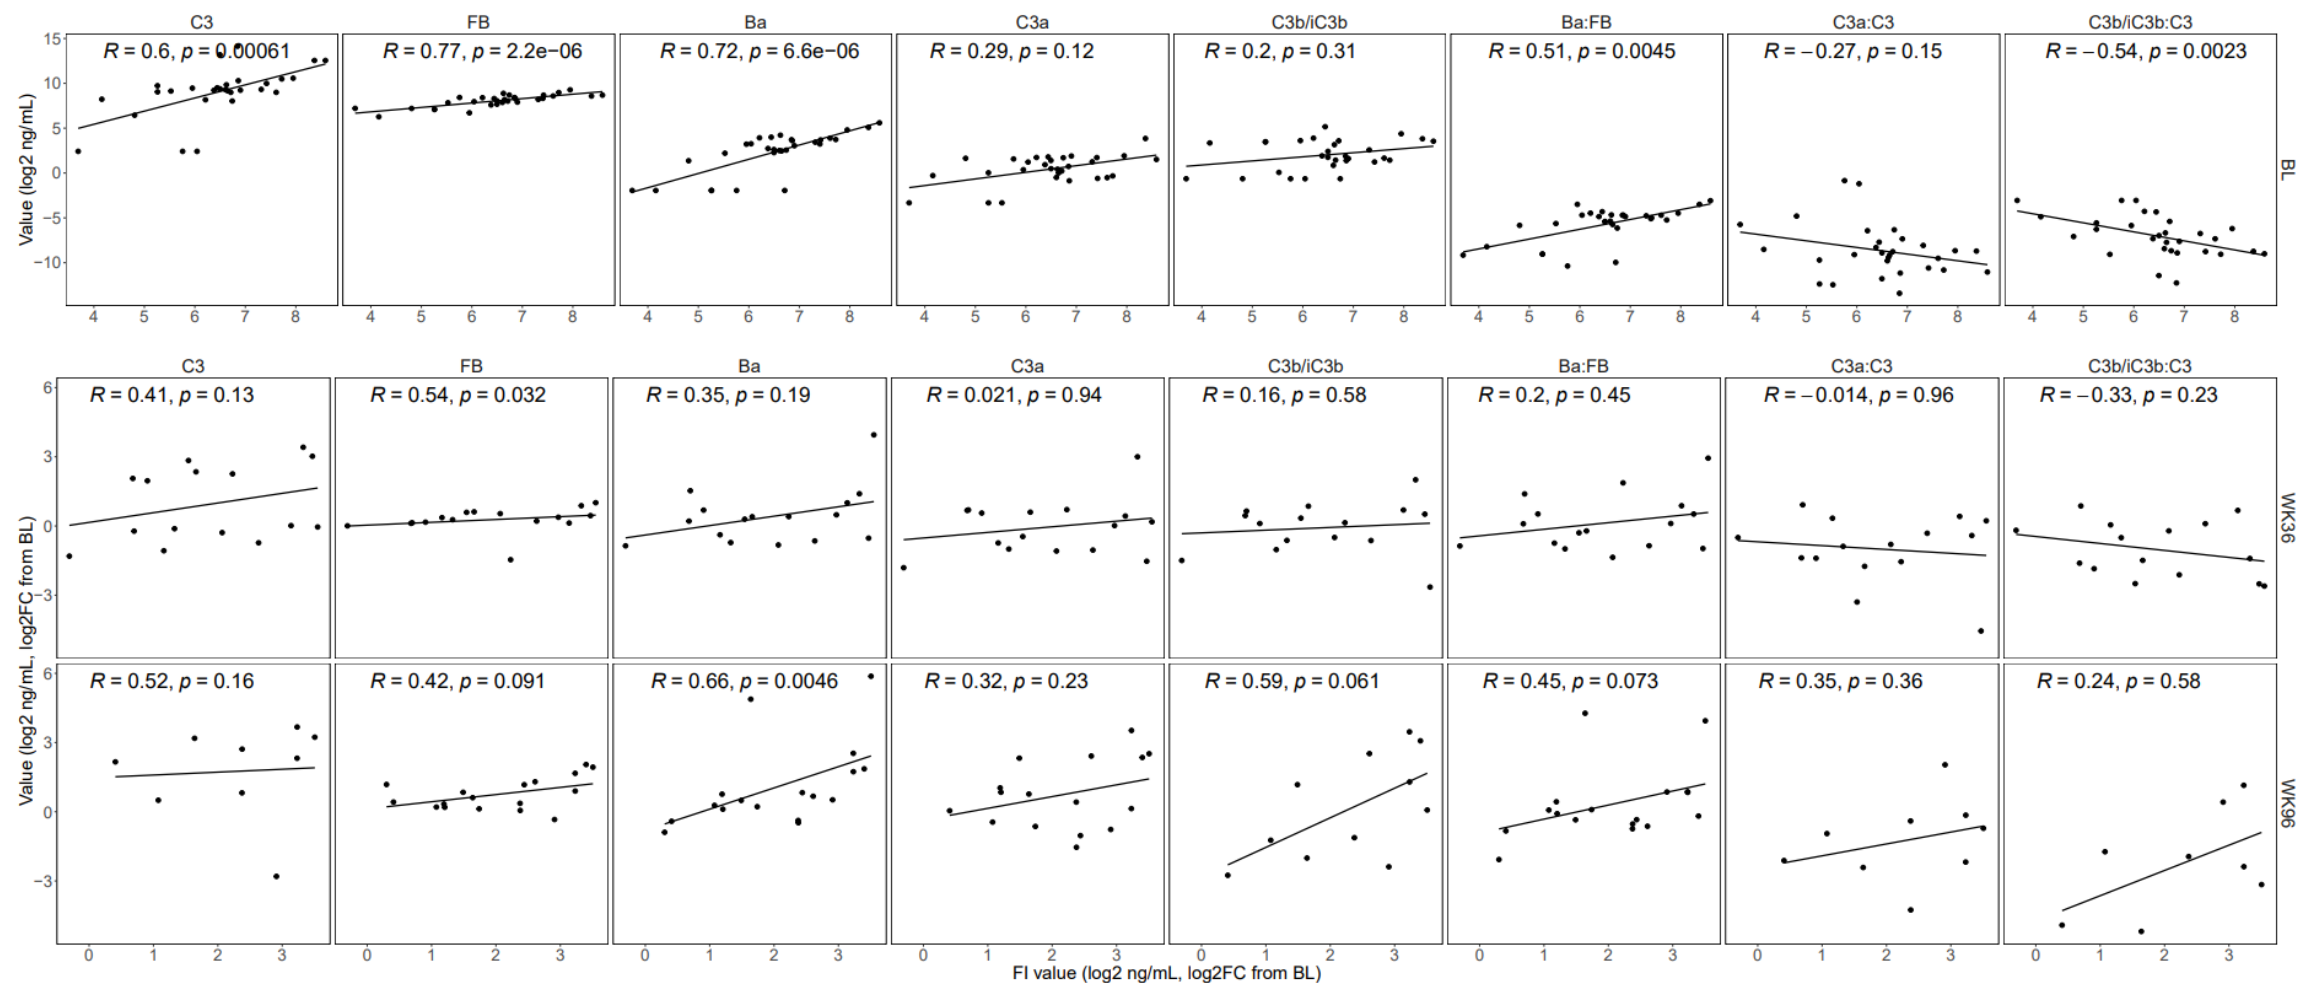

**Supplementary Figure 2.** AH complement biomarker pairwise correlation analysis. Pairwise correlation analysis of FI with intact complement proteins and breakdown products and ratios in the aqueous humor at baseline, week 36 and week 96 from subjects in cohorts 1 to 4. FI concentrations are shown by the X-axis while biomarker concentrations and ratios are shown by the y-axis. Correlations at BL are determined using log<sub>2</sub> ng/mL concentrations, correlations at weeks 36 and 96 are determined using log<sub>2</sub> fold change from BL. BL = Baseline; WK = week; FC = Fold Change; R = Spearman Correlation Coefficient; p = p-value.

# S Figure 3 – C3b/iC3b modulation after PPY988 delivery

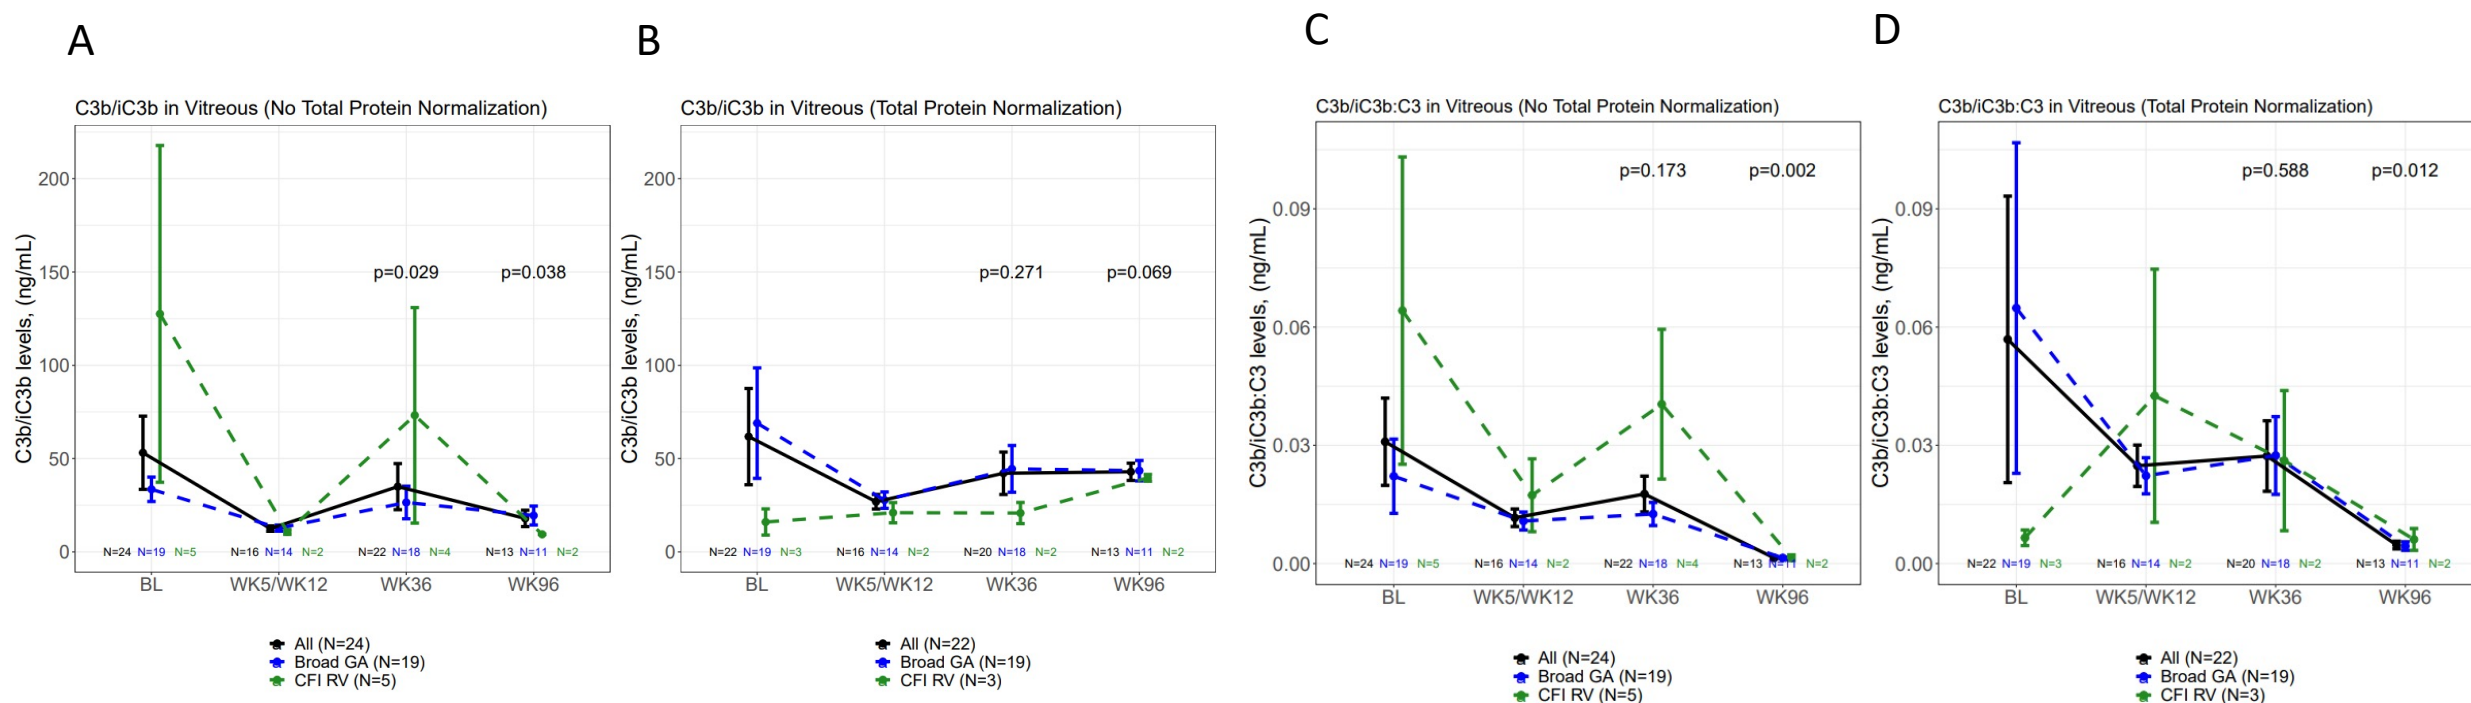

**Supplementary Figure 3.** Modulation of C3b/iC3b and C3b/iC3b:C3 by PPY988 delivery. (A,B) C3b/iC3b concentrations (y-axis, ng/mL) in VH samples by week post-surgery (x-axis) from subjects in cohorts 1 to 4. Mean +/- SE is shown by bars for all (black lines) broad (blue lines) and CFI RV (green lines) groups. Significant reductions in C3b/iC3b were observed at week 36 for both non-normalised (P=0.029) (A) but not total protein (TP) normalised (P=0.271) (B) data, and at week 96 for non-normalised (P=0.038) but not TP normalised (P=0.069) data. Notably these reductions are modest compared to for Ba modulation. (C,D) Ratios of C3b/iC3b:C3 concentration (Y-axis, ng/mL) were calculated for each subject at each sampling post-surgery week (X-axis). Mean +/- SE is shown by bars for all (black lines) broad (blue lines) and CFI RV (green lines) groups. No reductions were observed at week 36 for either non-normalised (P=0.173) (C) or TP normalised (P=0.588) (D) C3b/iC3b:C3 ratios. However, reductions were observed at week 96 for non-normalized (P=0.002) and TP normalized (P=0.012) C3b/iC3b:c3 ratios. Significance is defined as \*P<0.05; \*\*P<0.01, \*\*\*P<0.001. N numbers are shown above X-axis. BL = Baseline; WK= week.

## S Figure 4. Classical pathway engagement after PPY988 delivery

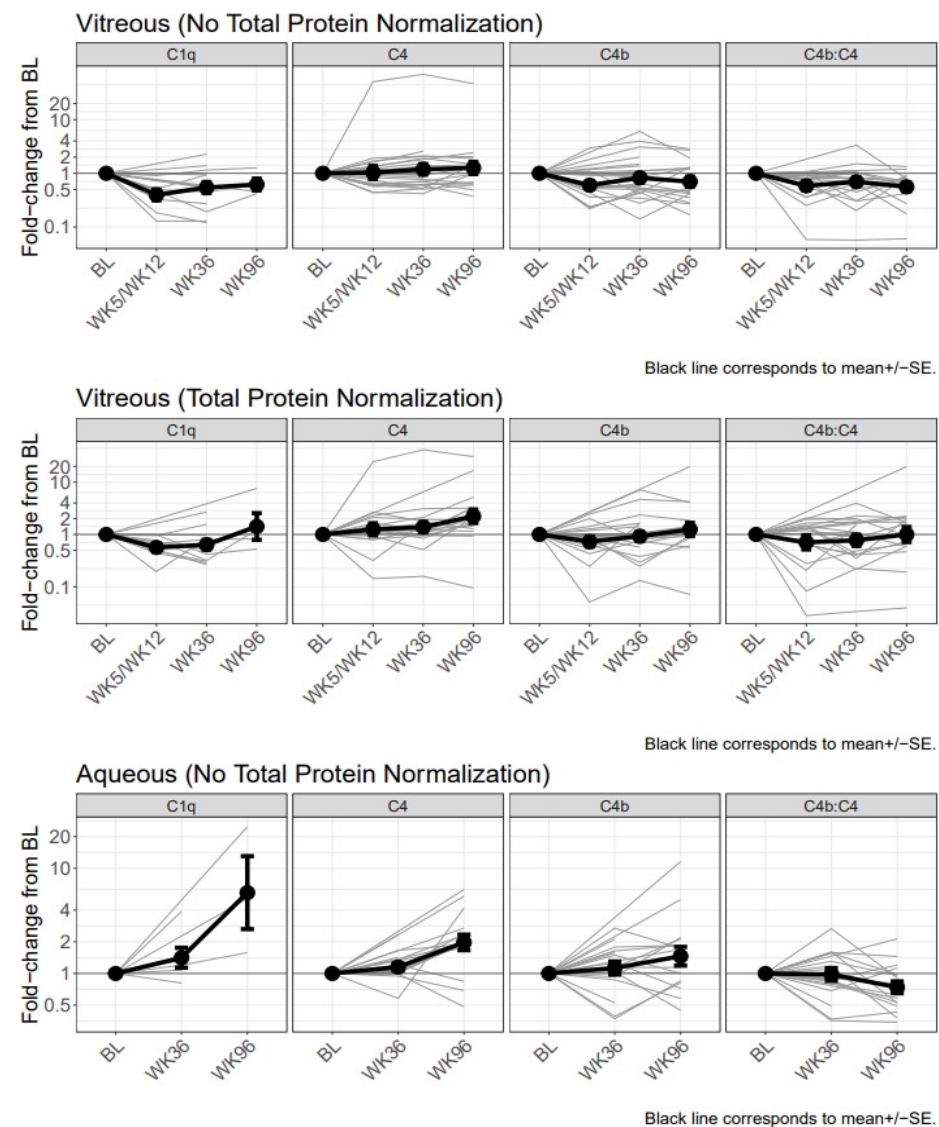

**Supplementary Figure 4.** Classical pathway (CP) engagement post-treatment with PPY988. Fold-changes (y-axis) in CP complement biomarkers [C1q, C4, C4b and C4b:C4] concentrations from baseline at each post-surgery week (VH: week 5/12, 36 and 96; AH: week 36 and 96; X-axis) are shown in VH with no normalisation (A), VH with total protein normalisation (B), and AH with no normalisation. Mean is shown by thick black lines, +/- SE is shown by bars. Individual subject changes are shown by grey lines. BL = Baseline; WK= week.

## S Figure 5. Complement Biomarker VH vs AH BL and OT

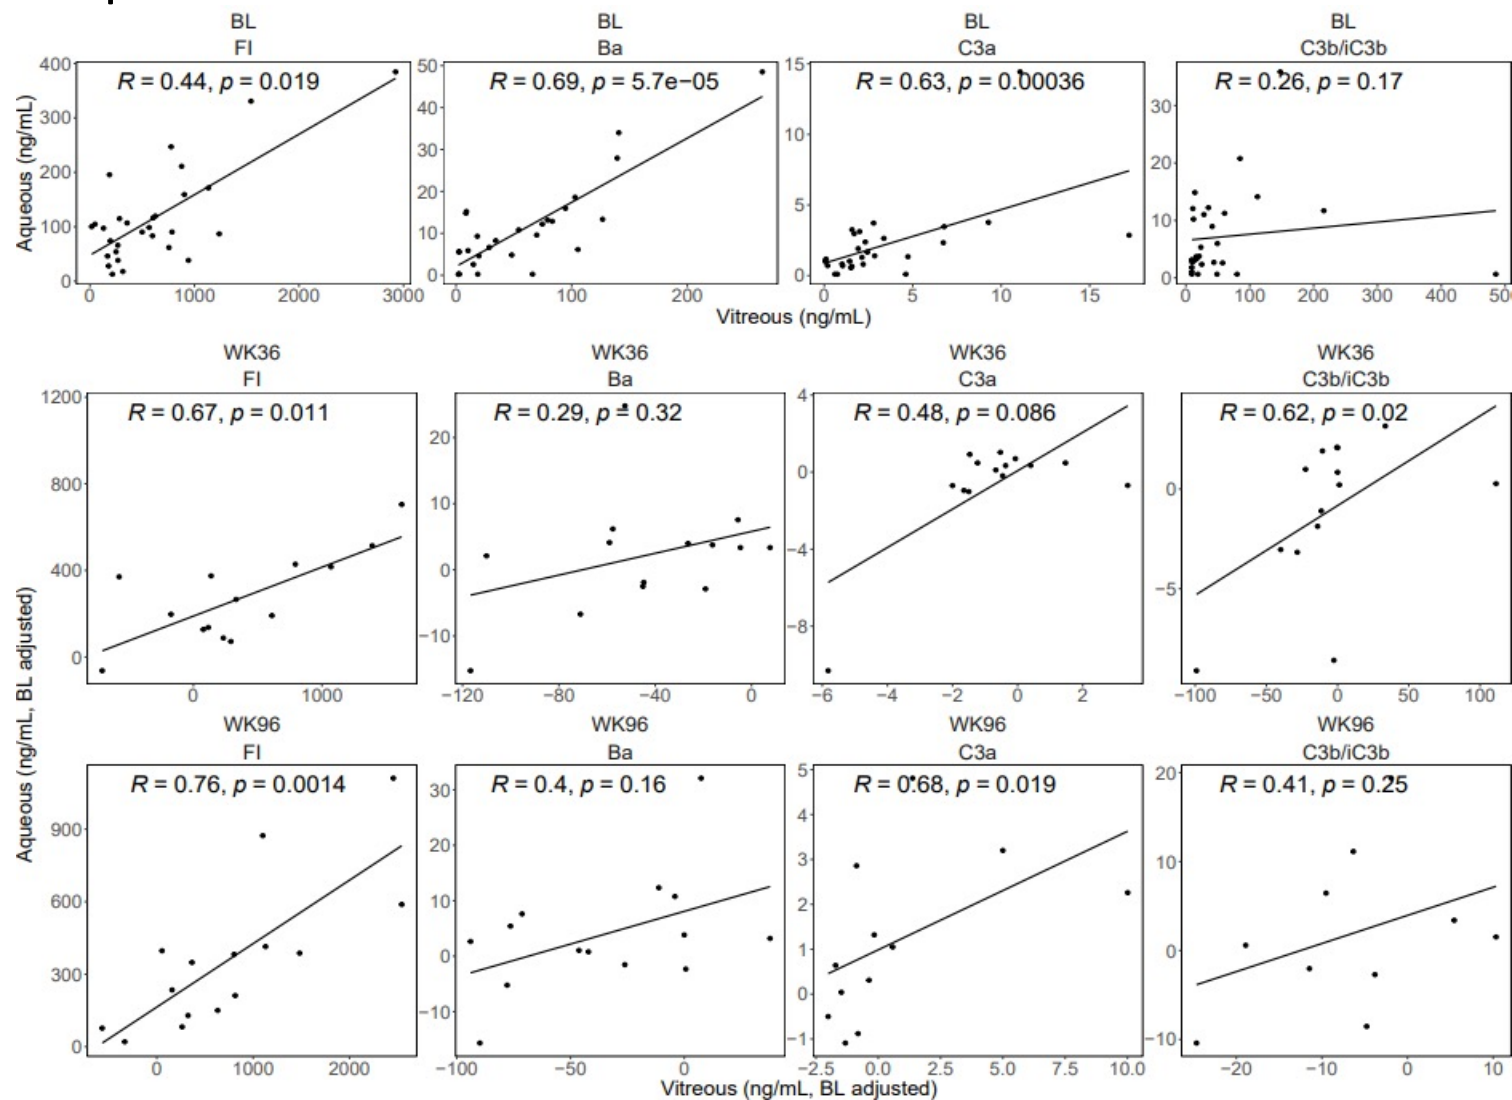

**Supplementary Figure 5.** Pairwise correlation analysis of vitreous versus aqueous humor complement biomarkers at baseline and post-treatment from subjects in cohorts 1 to 4. VH concentrations on x-axis and AH concentrations on y-axis of FI, Ba, C3a and C3b/iC3b at baseline, week 36 and week 96 post-surgery. Vitreous and aqueous concentrations of FI and C3a significantly correlate at all time points, Ba concentrations correlate only at baseline, while C3b/iC3b concentrations only correlate significantly at week 36 post-treatment. BL = Baseline; WK = week; R = Spearman Correlation Coefficient;  $p = p\text{-value}$ .

## S Figure 6. Olink analyses

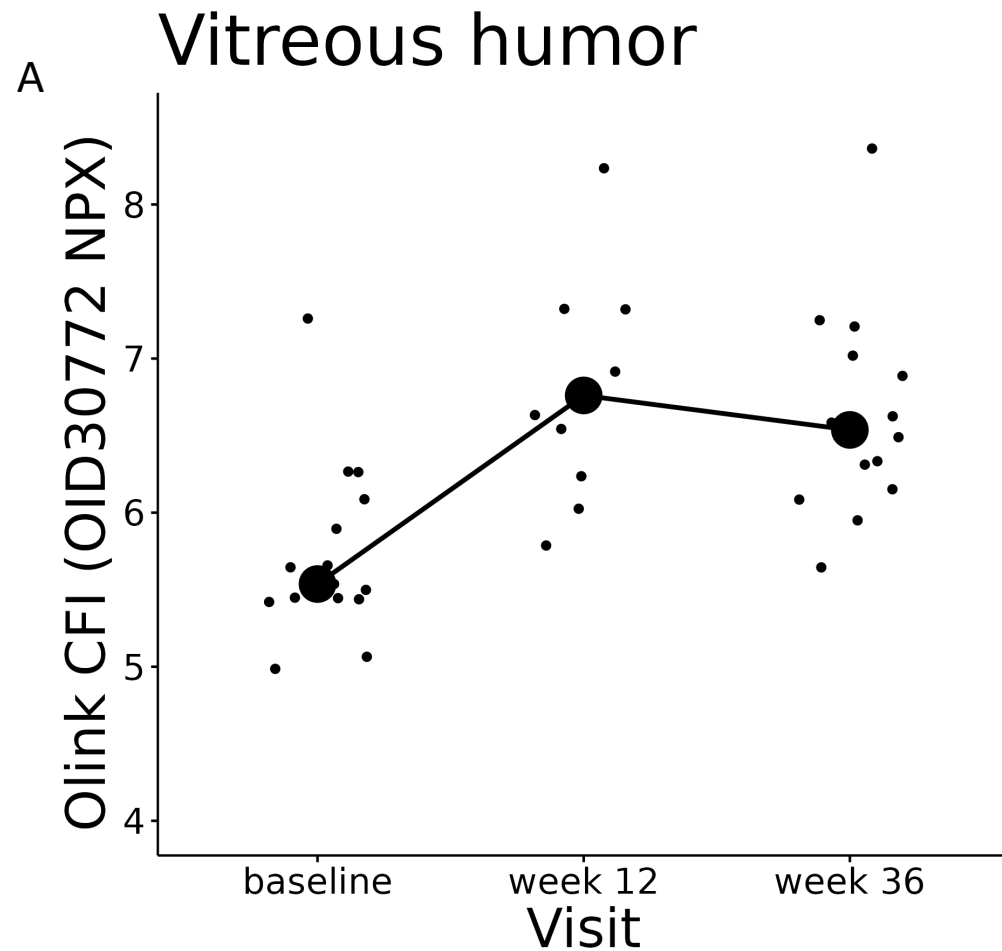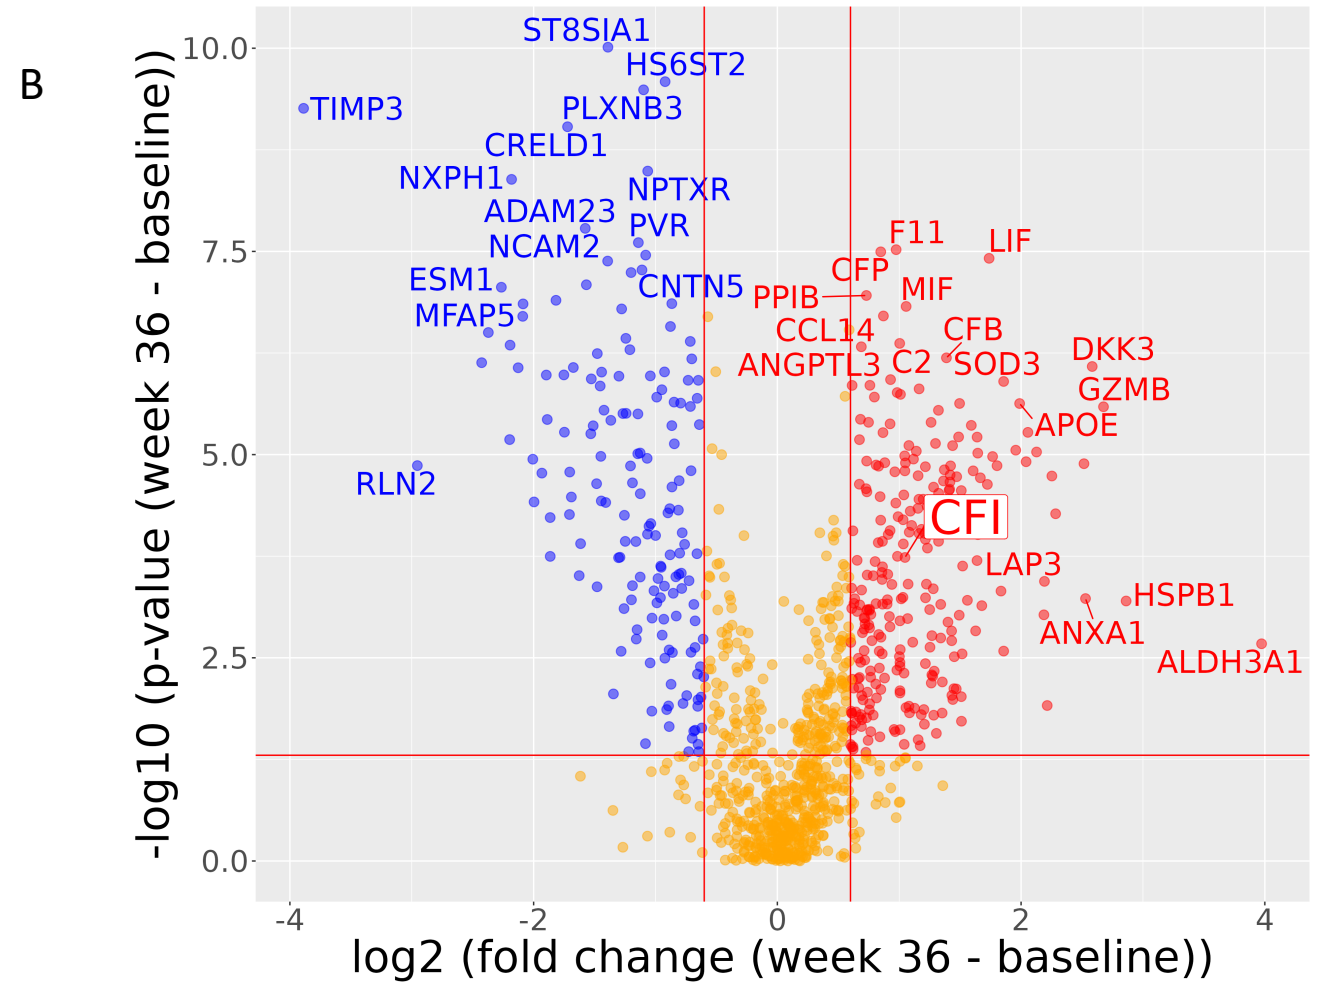

**Supplementary Figure 6.** Proteomic analysis of vitreous humor using Olink. **(A)** Change in FI levels (Olink OID30772) over time. Median FI values measured at baseline, week 12, and week 36 are linked. Sample numbers were baseline; n=17, week 12; n=14, week 36; n=17. **(B)** Volcano plot of differential protein expression (week 36 relative to baseline). Minimum protein fold-change was set at absolute 1.5. Data points with a nominal p-value of less than 0.05 were considered statistically significant (red dots indicate significantly upregulated proteins, blue dots indicate significantly downregulated proteins and orange dots represent no significant change on a log<sub>2</sub> scale).

# S Figure 7. Comparability of commercial FI to PPY988 FI potency

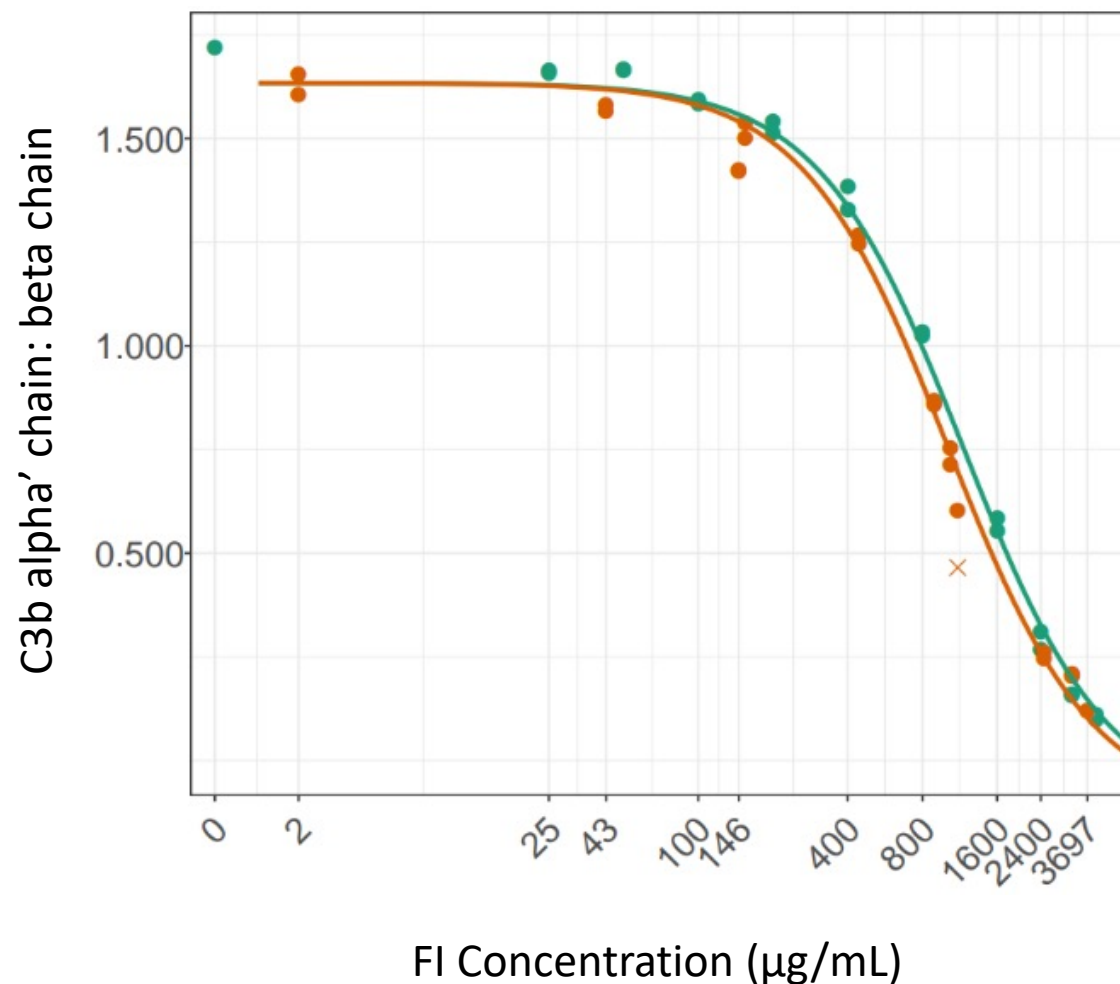

**Supplementary Figure 7.** Comparability of commercial FI to AAV2-CFI potency. C3b alpha' chain breakdown normalised to C3b intact beta chain (y-axis) produced by increasing concentrations of PPY988 (GMP#3) in orange compared to commercial FI (Complement Technology (CompTech), Inc) in green. The serum purified CompTech FI protein was diluted in non-transduced control sample so that both FI (reference sample) and PPY988 FI (test sample) were in the same background matrix to ensure comparability. No difference in potency was observed between PPY988 and CompTech FI Protein. Relative Potency of PPY988: **1.151**; 95% CI range: 1.065-1.244; Precision: 1.168. See supplemental methods for further details.



## S Table 1. Overview of FOCUS Part 1 and 2 study design, dose, number of subjects and biomarker matrices

| Part (name)                | Cohort | SR delivery method | PPY988 dose [vg/eye]                                      | Subjects (n) | Biomarker matrix; sampling timepoints                                         |
|----------------------------|--------|--------------------|-----------------------------------------------------------|--------------|-------------------------------------------------------------------------------|
| <b>1 (dose escalation)</b> | 1      | Standard           | low, 2E10                                                 | 3            | VH; BL, week 5, 36, 96<br>AH; BL, week 36, 96<br>Plasma: BL, week 5, 36, 96   |
|                            | 2      |                    | mid, 5E10                                                 | 4            | VH; BL, week 5, 36, 96<br>AH; BL, week 36, 96<br>Plasma: BL, week 12, 36, 96  |
|                            | 3      |                    | high, 2E11                                                | 4            | VH, BL, week 12, 36, 96<br>AH; BL, week 36, 96<br>Plasma: BL, week 12, 36, 96 |
| <b>2 (dose expansion)</b>  | 4      | Standard           | low, 2E10 (n=3);<br>mid, 5E10 (n=6);<br>high, 2E11 (n=11) | 20           | VH, BL, week 12, 36, 96<br>AH; BL, week 36, 96<br>Plasma: BL, week 12, 36, 96 |

**Supplementary Table 1.** FOCUS study overview. FOCUS consisted of four parts of either PPY988 dose escalation or expansion, divided by seven cohorts varying according to route of gene therapy administration, dose (vg; viral genomes), and biomarker matrix. Only Parts 1 and 2 (cohorts 1 to 4) are described given subretinal gene therapy delivery permitted vitreous humour (VH) sampling. VH, aqueous humour (AH) and plasma biomarker samples were collected from subjects prior to surgery at baseline (BL), and subsequent timepoints up to week 96 post-treatment. Emerging data and analysis on cohorts 1 and 2 indicated week 5 sampling from the VH was too early to evaluate an impact post-vitreotomy, so the first post-treatment evaluation for cohorts 3 and 4 was moved to a later time-point in the study (week 12), when it was expected that the proteome would have stabilised, and the transduced cells achieved maximal expression.

## S Table 2. FOCUS sample N numbers (at least one BL and one week 36/ week 96 successfully measured)

## Vitreous

| Visit                | FI | C3 | FB | FH | C1q | Ba | C3a | C3b/iC3b | C4 | C4b | Ba:FB | C3a:C3 | C3b/iC3b:C3 | C4b:C4 | C5 | FD | MBL |
|----------------------|----|----|----|----|-----|----|-----|----------|----|-----|-------|--------|-------------|--------|----|----|-----|
| <b>BL/pre-dosing</b> | 24 | 24 | 24 | 24 | 15  | 23 | 24  | 24       | 24 | 24  | 23    | 24     | 24          | 24     | 23 | 24 | 24  |
| <b>Week 5/12</b>     | 16 | 16 | 16 | 16 | 8   | 16 | 16  | 16       | 16 | 16  | 16    | 16     | 16          | 16     | 15 | 16 | 16  |
| <b>Week 36</b>       | 22 | 22 | 22 | 22 | 14  | 21 | 22  | 22       | 22 | 22  | 21    | 22     | 22          | 22     | 21 | 22 | 22  |
| <b>Week 96</b>       | 17 | 17 | 17 | 17 | 4   | 16 | 15  | 13       | 17 | 16  | 16    | 15     | 13          | 16     | 16 | 17 | 17  |

## Aqueous

| Visit                | FI | C3 | FB | FH | C1q | Ba | C3a | C3b/iC3b | C4 | C4b | Ba:FB | C3a:C3 | C3b/iC3b:C3 | C4b:C4 | C5 | FD | MBL |
|----------------------|----|----|----|----|-----|----|-----|----------|----|-----|-------|--------|-------------|--------|----|----|-----|
| <b>BL/pre-dosing</b> | 20 | 19 | 20 | 20 | 8   | 20 | 20  | 19       | 20 | 20  | 20    | 19     | 19          | 20     | 19 | 20 | 20  |
| <b>Week 5/12</b>     | 0  | 0  | 0  | 0  | 0   | 0  | 0   | 0        | 0  | 0   | 0     | 0      | 0           | 0      | 0  | 0  | 0   |
| <b>Week 36</b>       | 16 | 15 | 16 | 16 | 6   | 16 | 16  | 15       | 16 | 16  | 16    | 15     | 15          | 16     | 16 | 16 | 16  |
| <b>Week 96</b>       | 16 | 8  | 16 | 16 | 3   | 16 | 15  | 10       | 16 | 16  | 16    | 8      | 7           | 16     | 15 | 16 | 16  |

## Plasma

| Visit                | FI | C3 | FB | FH | C1q | Ba | C3a | C3b/iC3b | C4 | C4b | Ba:FB | C3a:C3 | C3b/iC3b:C3 | C4b:C4 | C5 | FD | MBL |
|----------------------|----|----|----|----|-----|----|-----|----------|----|-----|-------|--------|-------------|--------|----|----|-----|
| <b>BL/pre-dosing</b> | 15 | 16 | 16 | 16 | 9   | 20 | 13  | 12       | 16 | 17  | 13    | 13     | 12          | 16     | 17 | 15 | 17  |
| <b>Week 5/12</b>     | 0  | 0  | 0  | 0  | 0   | 0  | 0   | 0        | 0  | 0   | 0     | 0      | 0           | 0      | 0  | 0  | 0   |
| <b>Week 36</b>       | 15 | 16 | 16 | 16 | 9   | 20 | 13  | 12       | 16 | 17  | 13    | 13     | 12          | 16     | 17 | 15 | 17  |
| <b>Week 96</b>       | 0  | 0  | 0  | 0  | 0   | 0  | 0   | 0        | 0  | 0   | 0     | 0      | 0           | 0      | 0  | 0  | 0   |

**Supplementary Table 2.** Number of FOCUS samples analysed longitudinally across study. VH and AH samples from subjects in cohorts 1 to 4 that passed acceptance criteria taken at baseline (BL) and at each timepoint post treatment are provided. Only those subjects with sampling at both BL and at least one of week 36 or 96 time-points are included.

# S Table 3. VH Complement Biomarker baseline descriptive stats (ng/mL)

| Biomarker   | n  | Mean     | SD       | Median  | 25 <sup>th</sup> Percentile | 75 <sup>th</sup> Percentile | Minimum | Maximum  | LOD    | N LOD | ULOQ   | N ULOQ |
|-------------|----|----------|----------|---------|-----------------------------|-----------------------------|---------|----------|--------|-------|--------|--------|
| FI          | 29 | 608.88   | 587.42   | 499.91  | 215                         | 785.62                      | 16.91   | 2924.77  | 4.625  | 0     | 12500  | 0      |
| C3          | 29 | 17350.67 | 74622.03 | 2163.41 | 1104.46                     | 5344.56                     | 53.7    | 404817.6 | 53.7   | 2     | 60000  | 0      |
| FB          | 29 | 1083.14  | 817.41   | 765     | 504.85                      | 1402.1                      | 11.81   | 3037.52  | 5.8    | 0     | 6000   | 0      |
| FH          | 29 | 466.7    | 427.59   | 273.56  | 181.66                      | 652.73                      | 20.7    | 1430.34  | 20.7   | 1     | 30000  | 0      |
| C1q         | 19 | 140.45   | 106.43   | 126.07  | 70.85                       | 179.48                      | 18.48   | 478.34   | 18.48  | 2     | 7200   | 0      |
| Ba          | 28 | 58.07    | 60.43    | 41.3    | 10.06                       | 86.07                       | 2.08    | 264.86   | 2.6    | 4     | 416    | 0      |
| C3a         | 28 | 3.36     | 3.83     | 2.06    | 1.34                        | 3.68                        | 0.05    | 17.23    | 0.05   | 1     | 125    | 0      |
| C3b/iC3b    | 29 | 59.01    | 94.58    | 24.97   | 13.68                       | 57.56                       | 9.4     | 485.39   | 9.405  | 4     | 15000  | 0      |
| C4          | 29 | 2488.05  | 1998.79  | 1929.44 | 810.08                      | 3472.82                     | 31.51   | 7185.16  | 28.8   | 0     | 40000  | 0      |
| C4b         | 29 | 130.76   | 137.09   | 112     | 17.49                       | 180.12                      | 3.77    | 640.53   | 15.55  | 3     | 25000  | 0      |
| Ba:FB       | 28 | 0.05     | 0.05     | 0.04    | 0.02                        | 0.06                        | 0       | 0.22     | NA     | 0     | NA     | 0      |
| C3a:C3      | 28 | 0        | 0.01     | 0       | 0                           | 0                           | 0       | 0.03     | NA     | 0     | NA     | 0      |
| C3b/iC3b:C3 | 29 | 0.04     | 0.06     | 0.01    | 0.01                        | 0.03                        | 0       | 0.21     | NA     | 0     | NA     | 0      |
| C4b:C4      | 29 | 0.06     | 0.09     | 0.04    | 0.02                        | 0.07                        | 0       | 0.49     | NA     | 0     | NA     | 0      |
| C5          | 27 | 322.23   | 412.28   | 137     | 137                         | 320.05                      | 137     | 2022     | 137    | 14    | 100000 | 0      |
| FD          | 29 | 98.45    | 116.77   | 59.43   | 41.42                       | 113.73                      | 4.81    | 600.14   | 0.8625 | 0     | 625    | 0      |
| MBL         | 29 | 0.83     | 0.44     | 0.62    | 0.62                        | 0.86                        | 0.3     | 2.31     | 0.625  | 15    | 1250   | 0      |

**Supplementary Table 3.** Descriptive statistics of vitreous humour baseline complement biomarkers concentrations from subjects in cohorts 1 to 4. The number of samples correspond to the total number which could be measured and had a value within acceptance criteria. All concentrations shown are expressed in ng/mL.

# S Table 4. AH Complement Biomarker baseline descriptive stats (ng/mL)

| Biomarker   | n  | Mean    | SD     | Median | 25 <sup>th</sup> Percentile | 75 <sup>th</sup> Percentile | Minimum | Maximum  | LOD    | N LOD | ULOQ  | N ULOQ |
|-------------|----|---------|--------|--------|-----------------------------|-----------------------------|---------|----------|--------|-------|-------|--------|
| FI          | 30 | 117.22  | 86.85  | 98.04  | 62.91                       | 149.36                      | 12.9    | 384.48   | 7.24   | 0     | 10000 | 0      |
| C3          | 29 | 1881.16 | 3753.1 | 626.81 | 509.15                      | 1016.37                     | 5.34    | 18027.98 | 5.34   | 3     | 60000 | 2      |
| FB          | 30 | 292.98  | 125.62 | 293.88 | 210.25                      | 373.01                      | 77.29   | 620.46   | 0.82   | 0     | 600   | 0      |
| FH          | 30 | 81.97   | 53.39  | 70.97  | 45.81                       | 116.55                      | 0.61    | 225.46   | 0.61   | 1     | 3000  | 0      |
| C1q         | 18 | 12.81   | 12.07  | 13.43  | 1.64                        | 19.5                        | 1.64    | 42.29    | 1.644  | 8     | 720   | 0      |
| Ba          | 30 | 10.58   | 10.71  | 8.78   | 4.68                        | 13.3                        | 0.26    | 48.5     | 0.26   | 6     | 41.6  | 0      |
| C3a         | 30 | 2.23    | 2.59   | 1.53   | 0.8                         | 3.08                        | 0.1     | 14.43    | 0.1    | 3     | 62.5  | 0      |
| C3b/iC3b    | 29 | 7.17    | 7.72   | 3.7    | 2.35                        | 11.25                       | 0.64    | 35.85    | 0.6425 | 5     | 1500  | 0      |
| C4          | 30 | 533.3   | 309.05 | 494.6  | 273.48                      | 739.33                      | 133.86  | 1304.22  | 2.25   | 0     | 4000  | 0      |
| C4b         | 30 | 28.12   | 19.1   | 22.46  | 13.96                       | 42.28                       | 1.1     | 74.92    | 13.96  | 11    | 20000 | 0      |
| Ba:FB       | 30 | 0.03    | 0.03   | 0.03   | 0.02                        | 0.04                        | 0       | 0.12     | NA     | 0     | NA    | 0      |
| C3a:C3      | 29 | 0.04    | 0.13   | 0      | 0                           | 0                           | 0       | 0.56     | NA     | 0     | NA    | 0      |
| C3b/iC3b:C3 | 29 | 0.02    | 0.04   | 0.01   | 0                           | 0.02                        | 0       | 0.12     | NA     | 0     | NA    | 0      |
| C4b:C4      | 30 | 0.06    | 0.03   | 0.06   | 0.03                        | 0.09                        | 0       | 0.12     | NA     | 0     | NA    | 0      |
| C5          | 30 | 185.77  | 290.99 | 109.6  | 109.6                       | 109.6                       | 56.89   | 1424     | 109.6  | 21    | 80000 | 0      |
| FD          | 30 | 49.39   | 36.58  | 39.08  | 27.62                       | 55.55                       | 13.97   | 169.61   | 0.69   | 0     | 500   | 0      |
| MBL         | 30 | 0.77    | 0.35   | 0.81   | 0.81                        | 0.81                        | 0.18    | 2.3      | 0.81   | 24    | 1000  | 0      |

**Supplementary Table 4.** Descriptive statistics of aqueous humour baseline complement biomarkers concentrations from subjects in cohorts 1 to 4. The number of samples correspond to the total number which could be measured and had a value within acceptance criteria. All concentrations shown are expressed in ng/mL.

# S Table 5. Plasma Complement Biomarker baseline descriptive stats (ng/mL)

| Biomarker   | n  | Mean     | SD       | Median   | 25 <sup>th</sup> Percentile | 75 <sup>th</sup> Percentile | Minimum  | Maximum  | LOD   | N LOD | ULOQ    | N ULOQ |
|-------------|----|----------|----------|----------|-----------------------------|-----------------------------|----------|----------|-------|-------|---------|--------|
| FI          | 17 | 49870.41 | 24289.4  | 39078.61 | 33021.08                    | 72494.63                    | 22808.29 | 103375.3 | 69.4  | 0     | 100000  | 0      |
| C3          | 18 | 962012.1 | 1043101  | 604199   | 505331.4                    | 892754.6                    | 283085.1 | 4823003  | 2220  | 0     | 2400000 | 0      |
| FB          | 16 | 300852.6 | 121657.1 | 337809.1 | 199806.7                    | 405761.4                    | 105039   | 509413.1 | 328   | 0     | 240000  | 0      |
| FH          | 18 | 533381   | 232796.5 | 486689   | 369826.8                    | 558282.9                    | 306135.1 | 1182989  | 820   | 0     | 1200000 | 0      |
| C1q         | 11 | 277162.5 | 190015.1 | 230509.1 | 136774.3                    | 362309.1                    | 38599.86 | 601720.6 | 739.2 | 0     | 288000  | 0      |
| Ba          | 24 | 1463     | 843.96   | 1309.74  | 940.7                       | 1693.52                     | 572.56   | 3994.84  | 40    | 0     | 8320    | 0      |
| C3a         | 13 | 82.78    | 39.61    | 72.61    | 58.45                       | 106.75                      | 34.61    | 167.01   | 0.8   | 0     | 500     | 0      |
| C3b/iC3b    | 12 | 2304.74  | 1409.21  | 1849.01  | 1280.33                     | 2464.01                     | 1068.35  | 5007.02  | 174   | 0     | 600000  | 0      |
| C4          | 18 | 844393.7 | 548014.1 | 772567.2 | 319323.1                    | 1220485                     | 213627.3 | 1984159  | 1300  | 0     | 1600000 | 0      |
| C4b         | 19 | 92538.56 | 92460.5  | 39370.39 | 35871.43                    | 134493.1                    | 32750.46 | 294918   | 157   | 0     | 200000  | 0      |
| Ba:FB       | 13 | 0.01     | 0.01     | 0        | 0                           | 0.01                        | 0        | 0.02     | NA    | 0     | NA      | 0      |
| C3a:C3      | 13 | 0        | 0        | 0        | 0                           | 0                           | 0        | 0        | NA    | 0     | NA      | 0      |
| C3b/iC3b:C3 | 12 | 0        | 0        | 0        | 0                           | 0                           | 0        | 0        | NA    | 0     | NA      | 0      |
| C4b:C4      | 18 | 0.12     | 0.06     | 0.12     | 0.07                        | 0.16                        | 0.02     | 0.22     | NA    | 0     | NA      | 0      |
| C5          | 19 | 184245.6 | 58160.91 | 166647.7 | 147884.4                    | 214571.5                    | 112160.5 | 300772.6 | 864.8 | 0     | 800000  | 0      |
| FD          | 17 | 3488.28  | 1266.75  | 3895.65  | 2414.58                     | 4350.97                     | 1676.85  | 6036.23  | 4.5   | 0     | 5000    | 0      |
| MBL         | 19 | 2083.38  | 2020.93  | 915.63   | 707.42                      | 3337.35                     | 101.59   | 7415.09  | 3.3   | 0     | 10000   | 0      |

**Supplementary Table 5.** Descriptive statistics of plasma baseline complement biomarkers concentrations from subjects in cohorts 1 to 4. The number of samples correspond to the total number which could be measured and had a value within acceptance criteria. All concentrations shown are expressed in ng/mL.

**Supplementary Table 6. Temporal change in protein levels as evaluated using the Olink platform.**

Spreadsheet listing Olink (<https://olink.com/>) protein identifiers (IDs) that passed quality control alongside metrics for differential expression in vitreous humor comparing baseline to post-treatment at week 12 and week 36 timepoints. fdr = false discovery rate; NPX = normalised protein expression.

| OlinkID  | symbol   | Olink panel     | median_NPX (baseline) | median_NPX (week 12) | median_NPX (week 36) | p_value (week 12 - baseline) | fdr (week 12 - baseline) | fold change (week 12 - baseline) | p_value (week 36 - baseline) | fdr (week 36 - baseline) | fold change (week 36 - baseline) |
|----------|----------|-----------------|-----------------------|----------------------|----------------------|------------------------------|--------------------------|----------------------------------|------------------------------|--------------------------|----------------------------------|
| OID20051 | HNRNPK   | Cardiometabolic | -3.12295              | -2.0972              | -2.64035             | 0.014699                     | 0.028414                 | 2.049611                         | 0.37648                      | 0.456654                 | 1.219128                         |
| OID20052 | CEBPB    | Cardiometabolic | -1.0125               | -0.21365             | -0.249               | 0.013955                     | 0.027176                 | 1.266546                         | 0.058387                     | 0.096841                 | 1.705684                         |
| OID20055 | CRHR1    | Cardiometabolic | -0.4056               | 0.00055              | 0.06065              | 0.327746                     | 0.399406                 | 1.1776                           | 0.185553                     | 0.254671                 | 1.381514                         |
| OID20062 | AKR1C4   | Cardiometabolic | -0.78755              | -0.81395             | -0.2486              | 0.214993                     | 0.282709                 | 1.453368                         | 0.20042                      | 0.270678                 | 1.751693                         |
| OID20064 | SERPINB5 | Cardiometabolic | -2.53095              | 0.23315              | -0.08395             | 0.000126                     | 0.000502                 | 5.307932                         | 0.004613                     | 0.012001                 | 2.44037                          |
| OID20065 | HK2      | Cardiometabolic | -0.34135              | -0.24105             | -0.3366              | 0.241496                     | 0.310132                 | 1.234605                         | 0.941123                     | 0.954158                 | 1.08666                          |
| OID20067 | VSTM2L   | Cardiometabolic | 1.9692                | 1.30905              | 1.37605              | 0.056673                     | 0.089278                 | -1.59842                         | 0.051732                     | 0.086853                 | -1.70385                         |
| OID20068 | TIA1     | Cardiometabolic | -1.2432               | 0.0282               | -0.154               | 0.001264                     | 0.003452                 | 2.119318                         | 0.006469                     | 0.015962                 | 2.399943                         |
| OID20069 | CNPY2    | Cardiometabolic | 0.2917                | 0.75625              | 0.60015              | 0.045243                     | 0.074366                 | 1.404786                         | 0.136512                     | 0.197483                 | 1.453469                         |
| OID20072 | SUSD1    | Cardiometabolic | -4.56985              | -4.345               | -4.42105             | 0.315394                     | 0.386499                 | 1.1776                           | 0.338239                     | 0.419646                 | 1.534002                         |
| OID20074 | TNF      | Cardiometabolic | -0.6919               | 0.1163               | 0.19355              | 0.090972                     | 0.134905                 | 1.225822                         | 0.059468                     | 0.09819                  | 2.008544                         |

|          |          |                 |          |          |          |          |          |          |          |          |          |
|----------|----------|-----------------|----------|----------|----------|----------|----------|----------|----------|----------|----------|
| OID20079 | ACTA2    | Cardiometabolic | -1.5104  | -0.8014  | -0.41595 | 0.013183 | 0.026128 | 1.375446 | 0.001313 | 0.004267 | 1.897434 |
| OID20081 | EDIL3    | Cardiometabolic | 0.7179   | 0.54985  | 0.6915   | 0.300225 | 0.372628 | -1.05457 | 0.261678 | 0.338425 | 1.335056 |
| OID20083 | PTN      | Cardiometabolic | 6.1776   | 6.6878   | 6.71405  | 0.240719 | 0.309781 | 1.423014 | 0.040851 | 0.070748 | 1.400022 |
| OID20086 | COMT     | Cardiometabolic | -3.1683  | -1.76115 | -2.2563  | 0.001018 | 0.002926 | 2.291036 | 0.032182 | 0.057832 | 2.227615 |
| OID20087 | MMP7     | Cardiometabolic | -1.2438  | -0.97405 | -0.93775 | 0.67172  | 0.728083 | 1.079789 | 0.237966 | 0.311407 | 1.398713 |
| OID20089 | ADAMTS16 | Cardiometabolic | -1.056   | -0.8707  | -0.74315 | 0.225748 | 0.292579 | -1.072   | 0.712485 | 0.767722 | -1.00298 |
| OID20090 | GP2      | Cardiometabolic | -5.38955 | -4.51705 | -4.8175  | 0.12129  | 0.172733 | 1.764611 | 0.292659 | 0.373217 | 1.965573 |
| OID20094 | SLITRK6  | Cardiometabolic | 0.9046   | -0.36395 | -0.107   | 2.92E-08 | 1.52E-06 | -2.23814 | 4.27E-06 | 5.58E-05 | -1.55833 |
| OID20095 | GPR37    | Cardiometabolic | 4.3167   | 1.52145  | 1.69925  | 1.24E-06 | 1.69E-05 | -4.6491  | 7.4E-07  | 2.03E-05 | -5.37532 |
| OID20096 | GZMH     | Cardiometabolic | -5.98065 | -3.7922  | -3.7076  | 1.63E-05 | 9.78E-05 | 4.466981 | 1.83E-05 | 0.000149 | 4.765244 |
| OID20098 | THPO     | Cardiometabolic | -6.9717  | -5.87555 | -6.47275 | 0.007501 | 0.015914 | 1.858257 | 0.098794 | 0.150199 | 1.493762 |
| OID20099 | CLEC1A   | Cardiometabolic | -4.38635 | -4.08795 | -4.02765 | 0.460643 | 0.535224 | 1.031004 | 0.356279 | 0.436601 | -1.05709 |
| OID20100 | ENTPD6   | Cardiometabolic | -0.0159  | -0.59585 | -0.3971  | 0.000272 | 0.000951 | -1.37368 | 0.001534 | 0.004839 | -1.37183 |
| OID20101 | IL6      | Cardiometabolic | 0.13915  | 0.85985  | 1.24275  | 0.160015 | 0.219895 | 1.680686 | 0.015771 | 0.032725 | 1.608928 |
| OID20102 | CEACAM8  | Cardiometabolic | -5.1184  | -4.35085 | -4.2898  | 0.091042 | 0.134905 | 1.897829 | 0.161371 | 0.225427 | 1.775961 |
| OID20103 | S100P    | Cardiometabolic | -3.2768  | -1.6713  | -2.3663  | 0.004923 | 0.011032 | 3.313716 | 0.012443 | 0.027325 | 2.11367  |

|          |          |                 |          |          |          |          |          |          |          |          |          |
|----------|----------|-----------------|----------|----------|----------|----------|----------|----------|----------|----------|----------|
| OID20104 | ENTPD5   | Cardiometabolic | -2.18205 | -1.62835 | -1.61445 | 0.036847 | 0.062339 | 1.602528 | 0.015249 | 0.031831 | 1.526682 |
| OID20105 | ACE2     | Cardiometabolic | -3.3173  | -2.6121  | -2.78    | 0.002155 | 0.005403 | 1.948886 | 0.008034 | 0.018971 | 2.008544 |
| OID20106 | DCN      | Cardiometabolic | -0.83115 | -1.35895 | -1.06985 | 0.057028 | 0.08958  | -1.21348 | 0.139964 | 0.20089  | -1.17985 |
| OID20107 | GLO1     | Cardiometabolic | 0.65635  | 1.86205  | 1.60855  | 4.02E-06 | 3.8E-05  | 2.06401  | 5.8E-05  | 0.000353 | 1.987424 |
| OID20108 | PAG1     | Cardiometabolic | -2.50415 | -2.18245 | -3.03555 | 0.347596 | 0.42033  | 1.249802 | 0.156596 | 0.220157 | -1.38453 |
| OID20109 | ADAM15   | Cardiometabolic | -2.8568  | -3.27655 | -3.19475 | 0.001101 | 0.003099 | -1.33432 | 0.004023 | 0.010696 | -1.18308 |
| OID20110 | USP8     | Cardiometabolic | -4.1697  | -3.72955 | -3.58785 | 0.032681 | 0.056157 | 1.324502 | 0.098246 | 0.149618 | 1.452764 |
| OID20113 | CTSH     | Cardiometabolic | 0.77825  | -0.8898  | -0.5457  | 1.71E-08 | 1.17E-06 | -3.62744 | 9.66E-07 | 2.31E-05 | -2.71726 |
| OID20115 | MSTN     | Cardiometabolic | -0.38575 | -1.6902  | -1.60615 | 2.52E-06 | 2.83E-05 | -2.77733 | 9.77E-06 | 0.000101 | -2.21223 |
| OID20116 | BOC      | Cardiometabolic | -1.82555 | -1.92875 | -1.57635 | 0.920032 | 0.932775 | -1.00553 | 0.008776 | 0.020372 | 1.198891 |
| OID20121 | CCL27    | Cardiometabolic | -4.6039  | -5.76355 | -5.74235 | 1.09E-05 | 7.33E-05 | -2.16168 | 9.89E-05 | 0.000527 | -1.99917 |
| OID20122 | AK1      | Cardiometabolic | -2.2553  | -1.22635 | -1.238   | 0.001549 | 0.004109 | 2.038559 | 0.008574 | 0.020031 | 2.008544 |
| OID20123 | ANXA4    | Cardiometabolic | -1.37655 | -0.12485 | -0.4641  | 0.000545 | 0.001739 | 2.481393 | 0.015035 | 0.031626 | 2.120199 |
| OID20125 | NTproBNP | Cardiometabolic | 1.8125   | 0.76945  | 1.0228   | 0.001989 | 0.005068 | -1.56901 | 0.018138 | 0.036788 | -1.44683 |
| OID20126 | CLC      | Cardiometabolic | -3.16675 | -2.9296  | -3.2115  | 0.248412 | 0.318166 | 1.170358 | 0.730422 | 0.784739 | -1.07777 |
| OID20128 | LEPR     | Cardiometabolic | -3.1867  | -2.6109  | -2.68665 | 0.193925 | 0.259038 | 1.229609 | 0.125495 | 0.184958 | 1.094901 |



|          |         |                 |          |          |          |          |          |          |          |          |          |
|----------|---------|-----------------|----------|----------|----------|----------|----------|----------|----------|----------|----------|
| OID20129 | TSHB    | Cardiometabolic | -5.669   | -5.21285 | -5.105   | 0.000251 | 0.000893 | 1.590411 | 0.000237 | 0.001093 | 1.469372 |
| OID20130 | S100A11 | Cardiometabolic | -2.29    | -0.0738  | -0.68395 | 8.89E-05 | 0.000374 | 4.912645 | 0.001475 | 0.004688 | 3.088701 |
| OID20131 | VSIR    | Cardiometabolic | -0.04725 | 0.26275  | 0.31925  | 0.005195 | 0.011571 | 1.280139 | 0.006024 | 0.015067 | 1.437837 |
| OID20132 | PCDH17  | Cardiometabolic | 1.27935  | 0.2328   | 0.3165   | 1.39E-05 | 8.81E-05 | -2.01587 | 5.21E-05 | 0.000325 | -1.86361 |
| OID20133 | PDGFRA  | Cardiometabolic | 0.56085  | 0.22525  | 0.27535  | 0.001297 | 0.003534 | -1.19943 | 0.002507 | 0.007207 | -1.20535 |
| OID20135 | SNX9    | Cardiometabolic | -0.57915 | 0.00715  | -0.00525 | 0.001569 | 0.004142 | 1.368552 | 0.001105 | 0.003674 | 1.194287 |
| OID20136 | NTRK2   | Cardiometabolic | 1.21735  | 1.01155  | 0.89265  | 0.047412 | 0.077237 | -1.26326 | 0.011835 | 0.026253 | -1.10799 |
| OID20137 | ACY1    | Cardiometabolic | -2.8143  | -1.823   | -1.84175 | 0.000805 | 0.002409 | 2.083848 | 0.000392 | 0.001658 | 2.103658 |
| OID20141 | TGM2    | Cardiometabolic | -1.0627  | 0.7811   | 0.84285  | 0.000306 | 0.001036 | 2.927055 | 5.01E-05 | 0.000314 | 3.092021 |
| OID20142 | DPP7    | Cardiometabolic | 5.86985  | 6.48365  | 6.42375  | 0.005653 | 0.01244  | 1.649753 | 0.014669 | 0.030924 | 1.56401  |
| OID20143 | PLIN3   | Cardiometabolic | -1.98465 | -1.7095  | -1.83605 | 0.009231 | 0.018946 | 1.054128 | 0.120815 | 0.179264 | 1.104735 |
| OID20144 | PLPBP   | Cardiometabolic | -1.0848  | 0.40165  | 0.3852   | 3.78E-05 | 0.000183 | 2.543385 | 0.000447 | 0.001825 | 2.427296 |
| OID20145 | ICAM5   | Cardiometabolic | 1.7618   | 0.52035  | 0.45805  | 1.72E-07 | 5.23E-06 | -2.24078 | 5.76E-08 | 3.95E-06 | -2.29779 |
| OID20146 | PRKAR1A | Cardiometabolic | -2.96105 | -2.95575 | -2.8304  | 0.312642 | 0.385036 | 1.215669 | 0.40239  | 0.480421 | 1.095052 |
| OID20147 | IL6ST   | Cardiometabolic | 1.48325  | 0.9458   | 1.07105  | 0.099585 | 0.14677  | -1.41819 | 0.030475 | 0.055291 | -1.31148 |
| OID20148 | DCTPP1  | Cardiometabolic | -1.65735 | -0.90335 | -1.21105 | 0.007399 | 0.015776 | 1.686462 | 0.067658 | 0.108794 | 1.200762 |

|          |          |                 |          |          |          |          |          |          |          |          |          |
|----------|----------|-----------------|----------|----------|----------|----------|----------|----------|----------|----------|----------|
| OID20149 | PM20D1   | Cardiometabolic | -8.24105 | -8.01325 | -7.4456  | 0.218658 | 0.286158 | 1.268655 | 0.46836  | 0.545922 | 1.543173 |
| OID20150 | LACTB2   | Cardiometabolic | 0.17515  | 0.7917   | 0.7566   | 0.0002   | 0.000736 | 1.467235 | 0.000633 | 0.002405 | 1.388763 |
| OID20151 | FADD     | Cardiometabolic | -2.76225 | -1.87765 | -2.5281  | 0.001776 | 0.004578 | 1.672087 | 0.062591 | 0.102441 | 1.149973 |
| OID20152 | CGREF1   | Cardiometabolic | 2.18595  | 1.45285  | 1.69525  | 7.4E-07  | 1.27E-05 | -1.56694 | 1E-05    | 0.000103 | -1.37307 |
| OID20153 | CXCL8    | Cardiometabolic | 3.38195  | 3.91985  | 3.94815  | 0.006349 | 0.013696 | 1.556764 | 0.003856 | 0.010301 | 1.284494 |
| OID20154 | LGALS1   | Cardiometabolic | -0.71165 | -1.6252  | -1.6674  | 0.001638 | 0.004282 | -2.3818  | 0.013712 | 0.029463 | -1.87664 |
| OID20155 | IGFBPL1  | Cardiometabolic | 3.5638   | 3.0512   | 2.85285  | 9.9E-05  | 0.000406 | -1.65565 | 0.003013 | 0.008419 | -1.35613 |
| OID20156 | MNDA     | Cardiometabolic | -2.66915 | -2.50195 | -2.37805 | 0.433257 | 0.506081 | 1.094977 | 0.583001 | 0.649884 | 1.039976 |
| OID20157 | CDH6     | Cardiometabolic | -0.1631  | -0.4946  | -0.3536  | 0.018362 | 0.034641 | -1.26177 | 0.092584 | 0.142178 | -1.12276 |
| OID20158 | IL19     | Cardiometabolic | -0.1562  | -0.19465 | -0.1844  | 0.176686 | 0.239822 | -1.00744 | 0.217306 | 0.288864 | 1.048953 |
| OID20159 | ACAN     | Cardiometabolic | -2.59115 | -1.9935  | -2.3634  | 0.029255 | 0.051149 | 1.365662 | 0.995493 | 0.998161 | -1.13002 |
| OID20160 | PLXNB3   | Cardiometabolic | 1.84295  | 0.8225   | 0.81085  | 3.2E-10  | 1.43E-07 | -1.96319 | 3.25E-10 | 1.19E-07 | -2.14013 |
| OID20161 | TYRO3    | Cardiometabolic | -1.26035 | -1.2746  | -1.3705  | 0.5117   | 0.584648 | 1.066068 | 0.062696 | 0.102441 | -1.14425 |
| OID20162 | EIF4EBP1 | Cardiometabolic | -0.76635 | -0.78745 | -0.94565 | 0.341831 | 0.41473  | 1.094825 | 0.896842 | 0.922034 | -1.13233 |
| OID20163 | PDCD6    | Cardiometabolic | -4.783   | -3.80755 | -4.3597  | 0.001484 | 0.003957 | 2.100816 | 0.027119 | 0.050298 | 1.241126 |
| OID20164 | APLP1    | Cardiometabolic | 4.003    | 5.06305  | 5.03255  | 1.12E-05 | 7.4E-05  | 2.365426 | 1.41E-05 | 0.000124 | 2.320764 |

|          |         |                 |          |          |          |          |          |          |          |          |          |
|----------|---------|-----------------|----------|----------|----------|----------|----------|----------|----------|----------|----------|
| OID20165 | CLEC5A  | Cardiometabolic | 4.1414   | 4.2438   | 3.93915  | 0.230096 | 0.297229 | -1.02229 | 0.046816 | 0.079573 | -1.02758 |
| OID20166 | GSTA1   | Cardiometabolic | -5.7216  | -4.5786  | -4.12235 | 0.02851  | 0.050247 | 2.556642 | 0.012221 | 0.027054 | 4.640724 |
| OID20167 | IGSF8   | Cardiometabolic | 1.89505  | 1.06695  | 1.08975  | 2.01E-08 | 1.22E-06 | -1.77547 | 2.65E-07 | 1.04E-05 | -1.83668 |
| OID20168 | MEP1B   | Cardiometabolic | -4.5822  | -4.0754  | -3.8825  | 0.034494 | 0.059087 | 1.621411 | 0.021594 | 0.042339 | 1.523247 |
| OID20169 | SDC1    | Cardiometabolic | -0.28695 | 0.1186   | -0.154   | 0.042201 | 0.069996 | 1.098055 | 0.033553 | 0.059905 | 1.123928 |
| OID20170 | CDH2    | Cardiometabolic | 0.88435  | 0.31835  | 0.28     | 0.000701 | 0.002115 | -1.39605 | 0.000534 | 0.002139 | -1.50139 |
| OID20171 | MCFD2   | Cardiometabolic | 3.4476   | 4.09325  | 4.11955  | 0.000208 | 0.000757 | 1.597759 | 0.000303 | 0.001358 | 1.666822 |
| OID20172 | FCRL1   | Cardiometabolic | -5.1429  | -5.31905 | -5.39315 | 0.395066 | 0.46997  | -1.01329 | 0.859014 | 0.892334 | 1.023067 |
| OID20173 | GPNMB   | Cardiometabolic | 0.0788   | 0.20515  | 0.32305  | 0.519993 | 0.592775 | 1.11238  | 0.158233 | 0.221607 | 1.116358 |
| OID20174 | QDPR    | Cardiometabolic | 0.13935  | 1.3201   | 1.35325  | 3.6E-07  | 8.24E-06 | 1.899013 | 1.72E-06 | 3.1E-05  | 1.976845 |
| OID20175 | GHRL    | Cardiometabolic | -0.94295 | -0.18935 | -0.3302  | 0.001144 | 0.003172 | 1.591128 | 0.001552 | 0.004883 | 1.622592 |
| OID20176 | PPP1R2  | Cardiometabolic | -1.054   | -0.49275 | -0.69925 | 0.001052 | 0.002999 | 1.614682 | 0.121569 | 0.180138 | 1.302154 |
| OID20177 | CD2AP   | Cardiometabolic | -3.4592  | -2.68985 | -2.78585 | 0.007775 | 0.016448 | 1.43485  | 0.048531 | 0.082107 | 1.273104 |
| OID20178 | NADK    | Cardiometabolic | -2.28855 | -2.34755 | -2.56565 | 0.749563 | 0.79697  | -1.13237 | 0.781885 | 0.827878 | -1.20849 |
| OID20179 | CBLIF   | Cardiometabolic | -3.0387  | -3.48665 | -3.00365 | 0.021337 | 0.039375 | -1.29258 | 0.511294 | 0.581763 | 1.02172  |
| OID20180 | TINAGL1 | Cardiometabolic | 0.7727   | -0.4218  | -0.4995  | 3.47E-05 | 0.00017  | -2.12505 | 7.06E-05 | 0.000414 | -2.05359 |

|          |         |                 |          |          |          |          |          |          |          |          |          |
|----------|---------|-----------------|----------|----------|----------|----------|----------|----------|----------|----------|----------|
| OID20181 | CANT1   | Cardiometabolic | 2.29415  | 2.4346   | 2.4095   | 0.724579 | 0.777322 | 1.148101 | 0.909878 | 0.930211 | 1.169507 |
| OID20182 | SSC4D   | Cardiometabolic | -6.1452  | -6.3659  | -6.43165 | 0.030145 | 0.052372 | -1.5837  | 0.103982 | 0.15748  | -1.35952 |
| OID20183 | OLR1    | Cardiometabolic | 3.59345  | 2.7049   | 2.62965  | 2.34E-05 | 0.000128 | -1.9908  | 9.15E-05 | 0.000503 | -1.71814 |
| OID20184 | DIABLO  | Cardiometabolic | -0.80575 | -0.94675 | -1.28865 | 0.346535 | 0.41951  | 1.184066 | 0.377619 | 0.457008 | -1.01424 |
| OID20185 | LRP11   | Cardiometabolic | 3.3297   | 0.76465  | 1.12215  | 1.37E-07 | 5E-06    | -6.05993 | 1.4E-07  | 6.98E-06 | -4.24775 |
| OID20186 | SEMA3F  | Cardiometabolic | 3.56895  | 1.3303   | 1.7964   | 5.93E-06 | 4.89E-05 | -4.54837 | 2.28E-05 | 0.000176 | -2.79607 |
| OID20187 | LEP     | Cardiometabolic | -2.93065 | -4.62285 | -3.94635 | 0.025866 | 0.046331 | -2.36117 | 0.1159   | 0.173376 | -1.70303 |
| OID20188 | LPL     | Cardiometabolic | 0.85185  | 0.17235  | 0.0743   | 4.3E-06  | 4.03E-05 | -1.72979 | 2.33E-06 | 3.69E-05 | -1.73333 |
| OID20189 | ADGRG2  | Cardiometabolic | -3.75865 | -3.7664  | -3.83005 | 0.383682 | 0.459414 | -1.18933 | 0.609186 | 0.672924 | -1.20953 |
| OID20190 | SIGLEC7 | Cardiometabolic | -2.0063  | -1.9577  | -1.95845 | 0.510522 | 0.58391  | -1.05398 | 0.370019 | 0.450396 | 1.063264 |
| OID20191 | NPTXR   | Cardiometabolic | 3.74155  | 2.70535  | 2.6873   | 1.57E-09 | 2.47E-07 | -2.14154 | 3.25E-09 | 5.94E-07 | -2.09043 |
| OID20192 | GRAP2   | Cardiometabolic | -3.2926  | -2.54345 | -2.48315 | 0.003772 | 0.008756 | 1.927526 | 0.00057  | 0.002253 | 2.043015 |
| OID20193 | CDHR5   | Cardiometabolic | -3.57525 | -3.66525 | -3.60865 | 0.219088 | 0.286379 | -1.02772 | 0.42665  | 0.503182 | -1.00832 |
| OID20194 | THOP1   | Cardiometabolic | -2.94885 | -1.71435 | -1.99255 | 6.19E-06 | 4.99E-05 | 2.038418 | 0.000396 | 0.001664 | 1.918129 |
| OID20195 | GLRX    | Cardiometabolic | -1.72025 | -1.06705 | -1.44465 | 0.078607 | 0.119213 | 1.214279 | 0.903943 | 0.925004 | 1.178458 |
| OID20196 | KITLG   | Cardiometabolic | -2.8937  | -3.0282  | -2.9451  | 0.036267 | 0.061452 | -1.10792 | 0.489795 | 0.564767 | -1.02815 |

|          |         |                 |          |          |          |          |          |          |          |          |          |
|----------|---------|-----------------|----------|----------|----------|----------|----------|----------|----------|----------|----------|
| OID20197 | PILRB   | Cardiometabolic | 0.33415  | -0.02375 | 0.12695  | 0.355223 | 0.428609 | -1.10539 | 0.419489 | 0.497407 | -1.03422 |
| OID20198 | CLUL1   | Cardiometabolic | 4.59345  | 4.8567   | 5.0734   | 0.552572 | 0.622281 | 1.229695 | 0.120682 | 0.179264 | 1.295402 |
| OID20199 | AHCY    | Cardiometabolic | -0.426   | 0.90675  | 0.2838   | 0.001024 | 0.002927 | 2.038771 | 0.126807 | 0.186142 | 1.403569 |
| OID20200 | FABP2   | Cardiometabolic | -0.9443  | -0.85315 | -0.7279  | 0.205442 | 0.272763 | 1.250019 | 0.028035 | 0.051734 | 1.18173  |
| OID20201 | REN     | Cardiometabolic | 0.5535   | -1.17985 | -0.6777  | 1.81E-07 | 5.23E-06 | -2.65222 | 3.11E-06 | 4.51E-05 | -2.36379 |
| OID20203 | RNASE3  | Cardiometabolic | -1.9556  | -2.5395  | -2.68575 | 0.063104 | 0.098561 | -2.37957 | 0.07962  | 0.12489  | -2.04798 |
| OID20204 | SOST    | Cardiometabolic | -3.44365 | -3.5435  | -3.44765 | 0.148035 | 0.20575  | -1.1839  | 0.372902 | 0.452927 | -1.00814 |
| OID20205 | NPDC1   | Cardiometabolic | 4.5501   | 2.7494   | 3.297    | 1.27E-05 | 8.15E-05 | -2.61607 | 2.23E-05 | 0.000173 | -2.2801  |
| OID20206 | CD69    | Cardiometabolic | -1.5072  | -1.65515 | -1.26495 | 0.605749 | 0.669801 | -1.05727 | 0.138952 | 0.199698 | 1.048589 |
| OID20207 | CXCL5   | Cardiometabolic | -3.9409  | -4.9733  | -4.57425 | 0.050352 | 0.080684 | -1.82887 | 0.172077 | 0.238863 | -1.68553 |
| OID20208 | COL4A1  | Cardiometabolic | 3.47175  | 2.7372   | 2.7165   | 0.001942 | 0.004958 | -1.55925 | 0.017789 | 0.036305 | -1.2781  |
| OID20209 | LILRA5  | Cardiometabolic | -4.69675 | -4.42045 | -4.38715 | 0.067847 | 0.104923 | 1.191848 | 0.135909 | 0.196871 | 1.169588 |
| OID20210 | MARCO   | Cardiometabolic | -4.24165 | -4.77005 | -4.6274  | 0.078766 | 0.11929  | -1.82456 | 0.510927 | 0.581763 | -1.63768 |
| OID20211 | ANGPTL1 | Cardiometabolic | 3.50645  | 2.214    | 2.61545  | 6.38E-09 | 6.37E-07 | -2.25566 | 9.61E-07 | 2.31E-05 | -1.89993 |
| OID20212 | PRSS27  | Cardiometabolic | 1.0384   | 0.41855  | 0.36085  | 0.000208 | 0.000757 | -1.53214 | 0.000816 | 0.002871 | -1.40342 |
| OID20213 | SORT1   | Cardiometabolic | 2.04395  | 1.39905  | 1.44935  | 8.07E-07 | 1.28E-05 | -1.65353 | 8.45E-06 | 9.28E-05 | -1.44944 |

|          |           |                 |          |          |          |          |          |          |          |          |          |
|----------|-----------|-----------------|----------|----------|----------|----------|----------|----------|----------|----------|----------|
| OID20214 | SFTPD     | Cardiometabolic | -1.1441  | -2.569   | -2.49815 | 0.000138 | 0.00054  | -2.68263 | 0.000423 | 0.001758 | -2.78813 |
| OID20215 | DDC       | Cardiometabolic | -5.152   | -3.9713  | -3.98625 | 0.000565 | 0.001793 | 1.630201 | 9.34E-05 | 0.000508 | 2.240313 |
| OID20216 | SDC4      | Cardiometabolic | 1.63005  | 1.39635  | 1.4247   | 0.013959 | 0.027176 | -1.12674 | 0.023816 | 0.045716 | -1.03987 |
| OID20217 | HMOX1     | Cardiometabolic | -6.9408  | -6.25045 | -5.88375 | 0.473461 | 0.549066 | 1.133277 | 0.237942 | 0.311407 | 1.483598 |
| OID20218 | SNAP23    | Cardiometabolic | -4.7926  | -4.2628  | -4.5595  | 0.771979 | 0.817389 | 1.534587 | 0.327861 | 0.411419 | -1.25536 |
| OID20219 | SERPINA12 | Cardiometabolic | -6.6406  | -5.7151  | -5.7247  | 0.022797 | 0.041443 | 1.767794 | 0.19098  | 0.260168 | 1.847277 |
| OID20220 | GH1       | Cardiometabolic | -4.54605 | -4.58155 | -4.46655 | 0.044469 | 0.073203 | 1.115121 | 0.000808 | 0.002852 | 1.130687 |
| OID20221 | SPON2     | Cardiometabolic | 0.2515   | 0.00045  | 0.1079   | 0.021331 | 0.039375 | -1.16724 | 0.482663 | 0.559624 | -1.03893 |
| OID20222 | NECTIN2   | Cardiometabolic | 0.77875  | -0.07335 | -0.0166  | 2.53E-07 | 6.76E-06 | -1.80513 | 2.56E-06 | 3.93E-05 | -1.63972 |
| OID20223 | CHRD2     | Cardiometabolic | -3.5096  | -3.96675 | -3.9748  | 0.077898 | 0.118453 | -1.33025 | 0.059381 | 0.09819  | -1.53034 |
| OID20224 | ROR1      | Cardiometabolic | 0.68485  | -0.29055 | -0.1956  | 4.37E-09 | 4.92E-07 | -2.08276 | 3.51E-08 | 3.21E-06 | -2.11462 |
| OID20225 | CA13      | Cardiometabolic | -2.69135 | 0.08815  | -0.26555 | 2.16E-07 | 5.93E-06 | 6.191762 | 9.29E-06 | 9.9E-05  | 4.367931 |
| OID20226 | CCDC80    | Cardiometabolic | 2.50775  | 1.16525  | 1.237    | 1.18E-06 | 1.64E-05 | -2.43066 | 1.08E-06 | 2.38E-05 | -2.46229 |
| OID20227 | FBP1      | Cardiometabolic | -2.22705 | -2.4194  | -2.6548  | 0.736224 | 0.785591 | -1.21394 | 0.212316 | 0.284296 | -1.55251 |
| OID20228 | CTSL      | Cardiometabolic | 2.95515  | 2.5135   | 2.46795  | 0.000303 | 0.001036 | -1.33219 | 0.002176 | 0.00637  | -1.36183 |
| OID20229 | NRCAM     | Cardiometabolic | 3.3738   | 3.8806   | 3.89905  | 0.001061 | 0.003017 | 1.659157 | 0.003593 | 0.009764 | 1.606143 |

|          |        |                 |          |          |          |          |          |          |          |          |          |
|----------|--------|-----------------|----------|----------|----------|----------|----------|----------|----------|----------|----------|
| OID20230 | HSPB1  | Cardiometabolic | -2.09035 | -0.11085 | 0.68015  | 0.001015 | 0.002926 | 4.398769 | 0.000633 | 0.002405 | 7.269973 |
| OID20231 | THBD   | Cardiometabolic | -3.20575 | -2.9078  | -2.87535 | 0.026442 | 0.047195 | 1.294684 | 0.063883 | 0.10407  | 1.206979 |
| OID20232 | KYAT1  | Cardiometabolic | 1.96955  | 2.4123   | 2.34545  | 0.00461  | 0.010414 | 1.303689 | 0.070868 | 0.112772 | 1.255707 |
| OID20233 | FAM3C  | Cardiometabolic | 2.8006   | 3.94735  | 3.84425  | 2.89E-05 | 0.000149 | 2.261845 | 8.1E-05  | 0.000463 | 2.353487 |
| OID20234 | TYMP   | Cardiometabolic | -3.15685 | -3.39935 | -2.7864  | 0.792136 | 0.833109 | -1.32846 | 0.544896 | 0.615531 | 1.061902 |
| OID20235 | PCSK9  | Cardiometabolic | -2.3093  | -2.6694  | -2.80075 | 0.003069 | 0.007295 | -1.47116 | 0.156336 | 0.220157 | -1.37302 |
| OID20236 | IGFBP7 | Cardiometabolic | 4.0016   | 5.22055  | 5.2207   | 3.4E-06  | 3.44E-05 | 2.710859 | 1.78E-05 | 0.000147 | 2.671963 |
| OID20237 | UMOD   | Cardiometabolic | -3.15355 | -2.47715 | -2.2766  | 0.003855 | 0.008911 | 1.237304 | 0.002813 | 0.007919 | 1.270767 |
| OID20238 | PLTP   | Cardiometabolic | 1.58075  | -0.1272  | 0.44095  | 1.53E-06 | 1.95E-05 | -2.69213 | 5.58E-05 | 0.000342 | -2.38692 |
| OID20239 | MFAP5  | Cardiometabolic | -0.7269  | -3.6572  | -3.0168  | 1.37E-08 | 1.16E-06 | -5.44696 | 3.15E-07 | 1.15E-05 | -5.17515 |
| OID20240 | LDLR   | Cardiometabolic | 2.7833   | 2.78925  | 2.537    | 0.685529 | 0.741587 | 1.009541 | 0.339675 | 0.420952 | -1.00333 |
| OID20241 | CA4    | Cardiometabolic | 2.6614   | 3.21545  | 3.14445  | 0.047017 | 0.076708 | 1.274075 | 0.011614 | 0.025866 | 1.6905   |
| OID20242 | EPHB4  | Cardiometabolic | 2.0822   | 1.48205  | 1.52     | 5.82E-05 | 0.000261 | -1.4651  | 0.00031  | 0.001369 | -1.47406 |
| OID20243 | CDH5   | Cardiometabolic | -1.48885 | -0.75575 | -0.9611  | 0.243043 | 0.311754 | 1.079902 | 0.03982  | 0.069181 | 1.261246 |
| OID20244 | CES1   | Cardiometabolic | -1.3593  | -1.1135  | -1.0188  | 0.192244 | 0.257419 | 1.079827 | 0.122752 | 0.181647 | 1.181607 |
| OID20245 | FABP4  | Cardiometabolic | 2.274    | 2.45905  | 2.4952   | 0.038948 | 0.065091 | 1.25462  | 0.009089 | 0.020965 | 1.302876 |

|          |          |                 |          |          |          |          |          |          |          |          |          |
|----------|----------|-----------------|----------|----------|----------|----------|----------|----------|----------|----------|----------|
| OID20246 | IGFBP1   | Cardiometabolic | 1.68785  | 1.014    | 1.4168   | 0.029773 | 0.051891 | -1.36254 | 0.233802 | 0.307442 | -1.03764 |
| OID20247 | PLAT     | Cardiometabolic | 3.1782   | 1.43575  | 1.9779   | 4.56E-06 | 4.07E-05 | -2.26475 | 0.000235 | 0.00109  | -1.94181 |
| OID20248 | ICAM2    | Cardiometabolic | -0.0621  | -0.46795 | -0.241   | 0.000152 | 0.000582 | -1.31098 | 0.003229 | 0.008886 | -1.16874 |
| OID20249 | ADAMTS13 | Cardiometabolic | -3.3364  | -3.7605  | -3.1314  | 0.005753 | 0.012584 | -1.19478 | 0.177871 | 0.246282 | -1.05651 |
| OID20250 | IL1RL1   | Cardiometabolic | -0.39395 | 1.0682   | -0.1772  | 0.002096 | 0.005302 | 1.925789 | 0.732871 | 0.785832 | 1.002394 |
| OID20251 | GDF15    | Cardiometabolic | 4.69195  | 4.8067   | 4.76265  | 0.819809 | 0.855656 | -1.10114 | 0.198086 | 0.267855 | 1.065847 |
| OID20252 | PLA2G1B  | Cardiometabolic | 1.24045  | 1.9389   | 2.10095  | 4.45E-05 | 0.000208 | 1.628507 | 4.01E-06 | 5.37E-05 | 1.679638 |
| OID20253 | NOTCH3   | Cardiometabolic | 0.61975  | -0.74135 | -0.6802  | 8.65E-07 | 1.32E-05 | -2.87607 | 4.42E-06 | 5.58E-05 | -2.85067 |
| OID20254 | LTBP2    | Cardiometabolic | 6.80505  | 7.12925  | 7.2111   | 0.001406 | 0.003794 | 1.250756 | 0.001918 | 0.005802 | 1.432564 |
| OID20255 | TGFBR3   | Cardiometabolic | 1.80595  | -0.7745  | -0.2838  | 1.17E-07 | 4.46E-06 | -4.21768 | 8.54E-07 | 2.18E-05 | -4.36748 |
| OID20256 | VWF      | Cardiometabolic | -4.1984  | -3.6864  | -3.72785 | 0.030078 | 0.052339 | 1.535225 | 0.091658 | 0.141151 | 1.347934 |
| OID20257 | PEAR1    | Cardiometabolic | -1.25715 | -0.89795 | -1.15795 | 0.119236 | 0.170915 | 1.102975 | 0.206742 | 0.277849 | 1.147266 |
| OID20258 | REG3A    | Cardiometabolic | 2.63135  | 3.49675  | 3.30875  | 7.53E-06 | 5.62E-05 | 2.016915 | 6.41E-05 | 0.000378 | 1.800004 |
| OID20259 | XG       | Cardiometabolic | 2.75805  | 2.65135  | 2.87225  | 0.240941 | 0.309781 | -1.08249 | 0.847698 | 0.881621 | 1.043333 |
| OID20260 | ADGRE5   | Cardiometabolic | -1.20455 | -1.3424  | -0.9891  | 0.01363  | 0.026869 | -1.10026 | 0.555386 | 0.62481  | 1.036629 |
| OID20261 | FUCA1    | Cardiometabolic | 3.29205  | 3.5481   | 3.54775  | 0.931647 | 0.94281  | 1.129865 | 0.34021  | 0.421139 | 1.091642 |



|          |           |                 |         |          |         |          |          |          |          |          |          |
|----------|-----------|-----------------|---------|----------|---------|----------|----------|----------|----------|----------|----------|
| OID20262 | CD209     | Cardiometabolic | -0.6036 | -1.49155 | -1.1973 | 0.003078 | 0.0073   | -2.01342 | 0.144998 | 0.206496 | -1.48468 |
| OID20263 | MB        | Cardiometabolic | 0.43045 | 2.52225  | 2.54785 | 6.47E-05 | 0.000285 | 4.262796 | 8.82E-06 | 9.59E-05 | 3.880386 |
| OID20264 | DKK3      | Cardiometabolic | 2.52515 | 5.05065  | 4.90655 | 1.6E-07  | 5.23E-06 | 5.2014   | 8.24E-07 | 2.18E-05 | 5.994336 |
| OID20265 | TNFRSF10C | Cardiometabolic | 0.33525 | 0.65665  | 0.80165 | 0.255269 | 0.325157 | 1.130491 | 0.074564 | 0.118141 | 1.163846 |
| OID20266 | REG1B     | Cardiometabolic | 1.87605 | 3.0646   | 2.64535 | 0.000941 | 0.002742 | 2.377425 | 0.005486 | 0.013943 | 1.699959 |
| OID20267 | IL2RA     | Cardiometabolic | 0.2688  | 0.54755  | 0.79155 | 0.020736 | 0.038568 | 1.342898 | 0.006616 | 0.016252 | 1.44483  |
| OID20268 | PDGFRB    | Cardiometabolic | 1.9014  | 1.9775   | 1.79855 | 0.085954 | 0.12858  | 1.008178 | 0.07779  | 0.122369 | -1.06751 |
| OID20269 | MET       | Cardiometabolic | 1.68935 | 1.2394   | 1.36215 | 0.000934 | 0.002741 | -1.27655 | 0.004743 | 0.012311 | -1.25306 |
| OID20270 | ESAM      | Cardiometabolic | 4.8443  | 4.8731   | 4.9209  | 0.343529 | 0.41633  | 1.184682 | 0.807567 | 0.847714 | 1.131158 |
| OID20271 | CA3       | Cardiometabolic | 1.63455 | 2.18615  | 2.57175 | 0.015737 | 0.030208 | 1.440181 | 0.045966 | 0.078249 | 1.654849 |
| OID20272 | TNFSF13B  | Cardiometabolic | 2.87455 | 2.7727   | 3.6339  | 0.316723 | 0.387262 | 1.181607 | 0.004079 | 0.010792 | 1.457807 |
| OID20273 | ALCAM     | Cardiometabolic | 1.47195 | 1.4711   | 1.37905 | 0.711143 | 0.766275 | -1.04012 | 0.276038 | 0.354906 | -1.01234 |
| OID20274 | PLA2G2A   | Cardiometabolic | 1.6505  | 0.4827   | 0.6526  | 0.020759 | 0.038568 | -1.6362  | 0.00253  | 0.007253 | -1.85087 |
| OID20275 | MSMB      | Cardiometabolic | 0.18025 | 0.86665  | 0.96115 | 0.000499 | 0.001617 | 1.611495 | 0.00024  | 0.001102 | 1.818438 |
| OID20276 | CTSB      | Cardiometabolic | 5.00335 | 6.03285  | 6.1357  | 1.82E-06 | 2.22E-05 | 2.203581 | 9.07E-06 | 9.76E-05 | 2.204269 |
| OID20277 | ICAM3     | Cardiometabolic | -2.3278 | -1.9546  | -1.8541 | 0.04338  | 0.071627 | 1.179397 | 0.002011 | 0.005999 | 1.461348 |

|          |           |                 |          |          |          |          |          |          |          |          |          |
|----------|-----------|-----------------|----------|----------|----------|----------|----------|----------|----------|----------|----------|
| OID20278 | DPT       | Cardiometabolic | 0.7053   | 1.15475  | 1.24785  | 0.835838 | 0.869082 | 1.275489 | 0.236252 | 0.310293 | 1.416372 |
| OID20279 | CRTAC1    | Cardiometabolic | 1.10685  | 2.5309   | 2.62045  | 1.19E-06 | 1.64E-05 | 2.683377 | 2.35E-06 | 3.69E-05 | 2.819032 |
| OID20280 | CPA1      | Cardiometabolic | 1.54865  | 1.84285  | 1.98005  | 0.104825 | 0.153056 | 1.164895 | 0.007683 | 0.01826  | 1.239407 |
| OID20281 | SERPINA11 | Cardiometabolic | -5.4898  | -5.83095 | -4.9831  | 0.146339 | 0.204037 | -1.16922 | 0.042789 | 0.073756 | 1.297019 |
| OID20282 | CXCL16    | Cardiometabolic | 4.44915  | 4.38385  | 4.5463   | 0.651942 | 0.710856 | 1.10202  | 0.605105 | 0.669763 | 1.161388 |
| OID20283 | SEMA7A    | Cardiometabolic | 4.7195   | 6.15355  | 6.1951   | 9.9E-07  | 1.45E-05 | 3.075562 | 4.37E-06 | 5.58E-05 | 3.013625 |
| OID20284 | LGALS3    | Cardiometabolic | 1.45385  | 1.77015  | 1.7039   | 0.009407 | 0.019235 | 1.253186 | 0.035684 | 0.063195 | 1.206435 |
| OID20285 | MEGF9     | Cardiometabolic | 3.3946   | 3.31065  | 3.23485  | 0.267255 | 0.338462 | -1.04395 | 0.137804 | 0.198466 | -1.01227 |
| OID20286 | CORO1A    | Cardiometabolic | -0.85915 | -0.83425 | -0.97065 | 0.707223 | 0.763551 | -1.2038  | 0.6908   | 0.748193 | -1.1303  |
| OID20287 | ENG       | Cardiometabolic | -1.2692  | -1.5162  | -1.51575 | 0.001096 | 0.003093 | -1.13895 | 0.186894 | 0.256087 | -1.04247 |
| OID20288 | ENPP2     | Cardiometabolic | 2.6436   | 3.71725  | 3.73615  | 2.33E-05 | 0.000128 | 2.31498  | 0.00011  | 0.000579 | 2.320764 |
| OID20289 | CPB1      | Cardiometabolic | 1.0698   | 1.53435  | 1.71925  | 0.003211 | 0.00755  | 1.358533 | 0.001938 | 0.005829 | 1.428598 |
| OID20290 | SELE      | Cardiometabolic | -4.4777  | -3.78825 | -3.66715 | 0.053264 | 0.084514 | 1.392522 | 0.013451 | 0.029188 | 1.306312 |
| OID20291 | PAM       | Cardiometabolic | 4.3495   | 4.78415  | 4.78325  | 0.011409 | 0.023028 | 1.18218  | 0.02045  | 0.040605 | 1.141357 |
| OID20292 | COL6A3    | Cardiometabolic | 2.67375  | 3.11405  | 2.9665   | 0.000831 | 0.002473 | 1.357592 | 0.000851 | 0.002966 | 1.573525 |
| OID20293 | CST6      | Cardiometabolic | 2.91135  | 3.1997   | 3.25475  | 0.895037 | 0.916255 | 1.023173 | 0.33802  | 0.419646 | 1.18896  |

|          |         |                 |          |          |          |          |          |          |          |          |          |
|----------|---------|-----------------|----------|----------|----------|----------|----------|----------|----------|----------|----------|
| OID20294 | CSTB    | Cardiometabolic | 3.32     | 4.0211   | 3.7827   | 4.85E-06 | 4.3E-05  | 1.592618 | 6.41E-05 | 0.000378 | 1.377068 |
| OID20295 | DLK1    | Cardiometabolic | 0.8631   | 0.84865  | 0.9718   | 0.1767   | 0.239822 | -1.04837 | 0.717095 | 0.771932 | 1.065182 |
| OID20296 | GUSB    | Cardiometabolic | 5.6087   | 5.3186   | 5.2858   | 0.026477 | 0.047195 | -1.22226 | 0.013536 | 0.029314 | -1.17862 |
| OID20297 | SCARF1  | Cardiometabolic | 1.6098   | 1.92835  | 1.77845  | 0.188427 | 0.253235 | 1.143733 | 0.066504 | 0.107543 | 1.064296 |
| OID20298 | CELA3A  | Cardiometabolic | -1.5249  | -2.0275  | -1.6309  | 0.168843 | 0.231159 | -1.16748 | 0.93342  | 0.949856 | -1.0601  |
| OID20299 | CCN3    | Cardiometabolic | 4.23515  | 4.0769   | 4.20215  | 0.270109 | 0.341288 | -1.00542 | 0.998161 | 0.998161 | 1.06135  |
| OID20300 | HYOU1   | Cardiometabolic | 1.3782   | 0.9525   | 1.18695  | 0.009958 | 0.020249 | -1.35637 | 0.04412  | 0.075812 | -1.1928  |
| OID20301 | LILRB2  | Cardiometabolic | -0.2512  | 0.10315  | 0.07985  | 0.410452 | 0.483558 | 1.089563 | 0.067674 | 0.108794 | 1.14671  |
| OID20302 | ST6GAL1 | Cardiometabolic | 0.02665  | -0.9458  | -0.80685 | 0.000184 | 0.000688 | -1.94544 | 0.030886 | 0.055869 | -1.62282 |
| OID20303 | TIE1    | Cardiometabolic | 0.63035  | -0.14555 | 0.0171   | 0.149052 | 0.206902 | -1.54601 | 0.379908 | 0.458899 | -1.35933 |
| OID20304 | SIRPA   | Cardiometabolic | 4.29015  | 4.44435  | 4.3552   | 0.036998 | 0.062499 | 1.272089 | 0.085198 | 0.133259 | 1.163927 |
| OID20305 | CASP3   | Cardiometabolic | 0.0874   | 2.3034   | 1.5338   | 2.35E-05 | 0.000128 | 5.025266 | 0.002343 | 0.006824 | 2.382457 |
| OID20306 | PTPRS   | Cardiometabolic | 3.621    | 3.83375  | 3.91315  | 0.008162 | 0.017167 | 1.258975 | 0.030155 | 0.054909 | 1.31768  |
| OID20307 | CNTN1   | Cardiometabolic | 4.12805  | 4.63045  | 4.57595  | 0.000941 | 0.002742 | 1.463325 | 0.004579 | 0.011942 | 1.697839 |
| OID20308 | BPIFB1  | Cardiometabolic | -6.09785 | -6.52765 | -6.14955 | 0.397412 | 0.471739 | -1.16429 | 0.491281 | 0.56505  | -1.12748 |
| OID20309 | AZU1    | Cardiometabolic | -2.08095 | -2.24835 | -1.7782  | 0.11121  | 0.16067  | -1.53938 | 0.137914 | 0.198466 | 1.041707 |

|          |         |                 |          |          |         |          |          |          |          |          |          |
|----------|---------|-----------------|----------|----------|---------|----------|----------|----------|----------|----------|----------|
| OID20310 | PTPRF   | Cardiometabolic | 2.50195  | 1.44795  | 1.5452  | 6.82E-06 | 5.24E-05 | -1.73466 | 4.63E-05 | 0.000301 | -1.84421 |
| OID20311 | NOTCH1  | Cardiometabolic | 2.45315  | 1.8254   | 1.63455 | 1.35E-06 | 1.81E-05 | -1.49138 | 6.63E-07 | 1.87E-05 | -1.62721 |
| OID20312 | CHIT1   | Cardiometabolic | 4.23445  | 4.48805  | 4.34625 | 0.895393 | 0.916255 | 1.058008 | 0.025335 | 0.04788  | 1.481029 |
| OID20313 | PDGFA   | Cardiometabolic | 3.8659   | 4.0654   | 3.85875 | 0.100537 | 0.147777 | 1.222937 | 0.115849 | 0.173376 | 1.165258 |
| OID20314 | ACP5    | Cardiometabolic | 3.6625   | 3.34575  | 3.57835 | 0.314263 | 0.386406 | -1.0072  | 0.677001 | 0.735761 | 1.13418  |
| OID20315 | ITGB2   | Cardiometabolic | 0.2248   | 0.20575  | 0.04365 | 0.477775 | 0.553373 | 1.032184 | 0.076611 | 0.120687 | -1.20752 |
| OID20316 | FAS     | Cardiometabolic | 2.89215  | 2.40435  | 2.55555 | 0.077998 | 0.118453 | -1.24561 | 0.126097 | 0.185595 | -1.30297 |
| OID20317 | PLXNB2  | Cardiometabolic | 3.28915  | 3.622    | 3.5219  | 0.220094 | 0.287012 | 1.09047  | 0.090721 | 0.139904 | 1.018891 |
| OID20318 | GAS6    | Cardiometabolic | 5.3767   | 5.7414   | 5.76445 | 0.007125 | 0.01525  | 1.433111 | 0.000676 | 0.002516 | 1.54601  |
| OID20319 | EGFR    | Cardiometabolic | 1.7524   | 1.55945  | 1.40215 | 0.122645 | 0.17421  | -1.13383 | 0.014673 | 0.030924 | -1.1691  |
| OID20320 | QPCT    | Cardiometabolic | 3.10815  | 4.20275  | 4.10325 | 7.79E-07 | 1.28E-05 | 2.328579 | 4.01E-06 | 5.37E-05 | 2.397283 |
| OID20321 | RNASET2 | Cardiometabolic | 4.38115  | 5.60715  | 5.57015 | 7.65E-06 | 5.64E-05 | 2.39222  | 2.99E-05 | 0.000216 | 2.501858 |
| OID20322 | SPP1    | Cardiometabolic | 0.71065  | 2.77015  | 2.60155 | 2.87E-05 | 0.000149 | 2.896378 | 0.000235 | 0.00109  | 2.868408 |
| OID20323 | LILRB1  | Cardiometabolic | 0.63945  | 0.48465  | 0.6797  | 0.408131 | 0.481858 | -1.0913  | 0.504681 | 0.575621 | 1.04652  |
| OID20324 | LILRB5  | Cardiometabolic | -1.79775 | -1.53385 | -1.4387 | 0.171592 | 0.234338 | 1.157891 | 0.001778 | 0.005467 | 1.34742  |
| OID20325 | IGFBP2  | Cardiometabolic | 2.8785   | 1.18565  | 1.58195 | 0.000174 | 0.000658 | -2.50177 | 0.000415 | 0.001731 | -1.90053 |

|          |         |                 |          |          |          |          |          |          |          |          |          |
|----------|---------|-----------------|----------|----------|----------|----------|----------|----------|----------|----------|----------|
| OID20326 | PI3     | Cardiometabolic | 1.56075  | 1.78595  | 1.8072   | 0.000937 | 0.002742 | 1.301297 | 0.000789 | 0.002821 | 1.283026 |
| OID20327 | RETN    | Cardiometabolic | 0.5314   | 0.77575  | 0.83385  | 0.040376 | 0.067172 | 1.102325 | 0.029813 | 0.054376 | 1.16163  |
| OID20328 | CCL15   | Cardiometabolic | 1.45755  | 1.14735  | 1.26115  | 0.029153 | 0.051053 | -1.28891 | 0.027474 | 0.050785 | -1.14584 |
| OID20329 | PRTN3   | Cardiometabolic | -1.51905 | -1.66505 | -1.47285 | 0.529893 | 0.601056 | -1.42939 | 0.434393 | 0.511215 | 1.043369 |
| OID20330 | FAP     | Cardiometabolic | -1.4801  | -0.8179  | -0.8314  | 0.000482 | 0.001571 | 1.357028 | 0.000556 | 0.002205 | 1.367509 |
| OID20331 | PPIB    | Cardiometabolic | 4.38555  | 5.034    | 5.02455  | 7.04E-07 | 1.25E-05 | 1.495316 | 1.1E-07  | 6.37E-06 | 1.659214 |
| OID20332 | COL18A1 | Cardiometabolic | 1.226    | 2.09425  | 2.04765  | 1.05E-05 | 7.12E-05 | 2.105116 | 1.82E-05 | 0.000149 | 2.226689 |
| OID20333 | AMY2A   | Cardiometabolic | 1.3792   | 1.3717   | 1.43715  | 0.789108 | 0.832148 | -1.06161 | 0.69779  | 0.754108 | 1.063227 |
| OID20334 | CCL16   | Cardiometabolic | 0.30785  | -0.7732  | -0.66045 | 0.000195 | 0.000725 | -2.11558 | 0.000335 | 0.001441 | -1.97178 |
| OID20335 | COL1A1  | Cardiometabolic | 0.56095  | 1.44215  | 1.42915  | 2.47E-05 | 0.000133 | 2.208627 | 0.000282 | 0.001283 | 1.812021 |
| OID20336 | BLMH    | Cardiometabolic | 0.0951   | 0.62675  | 0.4966   | 0.035602 | 0.0607   | 1.518924 | 0.325697 | 0.40964  | 1.215037 |
| OID20337 | PRCP    | Cardiometabolic | 2.91555  | 3.14345  | 3.22525  | 0.001235 | 0.00338  | 1.241471 | 0.000176 | 0.000864 | 1.322163 |
| OID20338 | PGLYRP1 | Cardiometabolic | 1.6995   | 2.06305  | 2.13615  | 0.016633 | 0.031651 | 1.16542  | 0.006509 | 0.016023 | 1.457807 |
| OID20339 | CD59    | Cardiometabolic | 2.48935  | 3.86345  | 3.81905  | 2.24E-06 | 2.59E-05 | 2.768971 | 1.58E-05 | 0.000135 | 3.045122 |
| OID20340 | AMY2B   | Cardiometabolic | 1.674    | 1.6115   | 1.51195  | 0.321238 | 0.392346 | -1.09981 | 0.271175 | 0.349882 | 1.03154  |
| OID20341 | TCN2    | Cardiometabolic | 2.79645  | 2.46025  | 3.1853   | 0.473557 | 0.549066 | 1.10784  | 0.171749 | 0.238709 | 1.258888 |

|          |              |                 |         |         |          |          |          |          |          |          |          |
|----------|--------------|-----------------|---------|---------|----------|----------|----------|----------|----------|----------|----------|
| OID20342 | SERPINE1     | Cardiometabolic | 1.5863  | 2.62275 | 2.31915  | 1.79E-05 | 0.000104 | 1.845997 | 8.66E-05 | 0.000488 | 1.536928 |
| OID20343 | MCAM         | Cardiometabolic | 5.1513  | 4.94705 | 4.89935  | 0.10038  | 0.147744 | -1.03605 | 0.023566 | 0.045317 | -1.11903 |
| OID20344 | DEFA1_DEFA1B | Cardiometabolic | 5.8592  | 5.79415 | 5.95685  | 0.110878 | 0.160401 | -1.11092 | 0.277487 | 0.356352 | 1.024592 |
| OID20345 | VASN         | Cardiometabolic | 4.565   | 4.9156  | 4.87845  | 4.46E-06 | 4.05E-05 | 1.42568  | 9.16E-05 | 0.000503 | 1.273324 |
| OID20346 | ART3         | Cardiometabolic | 3.9926  | 4.2965  | 4.2838   | 0.121179 | 0.172733 | 1.278587 | 0.087533 | 0.136134 | 1.166996 |
| OID20347 | CNDP1        | Cardiometabolic | 4.0504  | 4.71405 | 4.76585  | 0.001024 | 0.002927 | 1.471768 | 0.001242 | 0.004071 | 1.682143 |
| OID20348 | IL18BP       | Cardiometabolic | 4.83705 | 5.1006  | 5.22875  | 0.018976 | 0.0356   | 1.116087 | 0.000658 | 0.002467 | 1.303599 |
| OID20349 | F9           | Cardiometabolic | 0.4529  | 0.1619  | 0.5609   | 0.09086  | 0.134905 | -1.27514 | 0.488588 | 0.564705 | 1.166552 |
| OID20350 | ANPEP        | Cardiometabolic | 1.0734  | 1.84055 | 1.69185  | 0.000585 | 0.001839 | 1.523564 | 0.000439 | 0.00181  | 1.525255 |
| OID20351 | SSC5D        | Cardiometabolic | 2.4033  | 1.19695 | 1.6052   | 3.15E-05 | 0.000159 | -2.14712 | 0.000356 | 0.00152  | -1.65267 |
| OID20352 | ITIH3        | Cardiometabolic | 0.6621  | 1.032   | 1.0776   | 0.304431 | 0.376849 | 1.079864 | 0.33137  | 0.415348 | 1.048335 |
| OID20353 | CDH1         | Cardiometabolic | 3.8441  | 4.20005 | 4.37905  | 0.002204 | 0.005488 | 1.259324 | 0.011661 | 0.025918 | 1.192426 |
| OID20354 | NCAM1        | Cardiometabolic | 5.83545 | 6.13515 | 6.15895  | 0.001711 | 0.004433 | 1.387656 | 0.02288  | 0.044386 | 1.451053 |
| OID20355 | LBP          | Cardiometabolic | -0.2335 | -2.2774 | -1.85665 | 1.6E-05  | 9.65E-05 | -3.24013 | 0.000309 | 0.001369 | -3.08677 |
| OID20356 | OSMR         | Cardiometabolic | 3.80045 | 3.99085 | 4.01555  | 0.049212 | 0.07923  | 1.170967 | 0.014603 | 0.030894 | 1.188177 |
| OID20357 | HYAL1        | Cardiometabolic | 3.59935 | 2.02735 | 2.5792   | 1.71E-05 | 0.000101 | -2.31049 | 0.000785 | 0.002816 | -2.39214 |

|          |         |                 |         |         |         |          |          |          |          |          |          |
|----------|---------|-----------------|---------|---------|---------|----------|----------|----------|----------|----------|----------|
| OID20358 | CTSD    | Cardiometabolic | 2.88425 | 5.30915 | 5.1402  | 1.42E-06 | 1.87E-05 | 4.921336 | 1.29E-05 | 0.00012  | 5.71994  |
| OID20359 | TNC     | Cardiometabolic | 5.26285 | 3.63875 | 3.7516  | 4.48E-09 | 4.92E-07 | -2.9673  | 8.13E-08 | 5.25E-06 | -2.96339 |
| OID20360 | CD163   | Cardiometabolic | 4.20375 | 4.8824  | 4.49375 | 4.44E-05 | 0.000208 | 1.725124 | 0.149782 | 0.212756 | 1.248763 |
| OID20361 | SPARCL1 | Cardiometabolic | 4.6388  | 5.90145 | 5.93975 | 1.15E-06 | 1.64E-05 | 2.58874  | 6.06E-06 | 7.19E-05 | 2.803444 |
| OID20362 | NID1    | Cardiometabolic | 4.2103  | 3.87435 | 3.83985 | 0.00099  | 0.002861 | -1.20966 | 0.005751 | 0.014484 | -1.08478 |
| OID20363 | AXL     | Cardiometabolic | 5.4685  | 5.8894  | 5.7247  | 0.000251 | 0.000893 | 1.51803  | 0.001713 | 0.005299 | 1.449444 |
| OID20364 | PRSS2   | Cardiometabolic | 5.44125 | 5.94835 | 6.0387  | 0.012742 | 0.025485 | 1.499883 | 0.001782 | 0.005467 | 1.512987 |
| OID20365 | CTS2    | Cardiometabolic | 5.1498  | 6.34465 | 6.27395 | 7.89E-06 | 5.72E-05 | 2.435554 | 7.26E-05 | 0.000424 | 2.439017 |
| OID20366 | CHL1    | Cardiometabolic | 4.94225 | 5.39585 | 5.46335 | 0.000505 | 0.001631 | 1.454527 | 0.002045 | 0.006069 | 1.518556 |
| OID20367 | C1QTNF1 | Cardiometabolic | 6.2567  | 4.983   | 5.3464  | 2.58E-06 | 2.83E-05 | -2.1114  | 0.000163 | 0.000811 | -1.74279 |
| OID20368 | THBS4   | Cardiometabolic | 2.4982  | 1.61675 | 1.62495 | 2.21E-06 | 2.58E-05 | -1.51645 | 1.58E-05 | 0.000135 | -1.63376 |
| OID20369 | TFRC    | Cardiometabolic | 0.2211  | 0.35925 | 0.47285 | 0.134152 | 0.188844 | 1.275842 | 0.031563 | 0.056813 | 1.309395 |
| OID20370 | KIT     | Cardiometabolic | 1.87215 | 2.1318  | 2.08775 | 0.120167 | 0.172026 | 1.181197 | 0.337316 | 0.419449 | 1.224973 |
| OID20371 | TFF3    | Cardiometabolic | 6.65475 | 7.30635 | 7.3981  | 0.003603 | 0.0084   | 1.52425  | 0.001876 | 0.00569  | 1.514561 |
| OID20372 | F7      | Cardiometabolic | 1.36295 | 1.36405 | 1.25365 | 0.027978 | 0.049628 | -1.1719  | 0.232879 | 0.306595 | -1.0357  |
| OID20373 | RARRES2 | Cardiometabolic | 5.16925 | 5.53795 | 5.55685 | 0.013885 | 0.027127 | 1.381227 | 0.021942 | 0.042946 | 1.34574  |

|          |        |                 |          |          |          |          |          |          |          |          |          |
|----------|--------|-----------------|----------|----------|----------|----------|----------|----------|----------|----------|----------|
| OID20374 | APOM   | Cardiometabolic | -0.65755 | -0.36785 | 0.3839   | 0.000512 | 0.00165  | 1.585898 | 1.04E-05 | 0.000105 | 2.063009 |
| OID20375 | TIMD4  | Cardiometabolic | -0.65525 | -0.6787  | -0.51465 | 0.048974 | 0.079078 | -1.37402 | 0.634301 | 0.695072 | -1.00933 |
| OID20376 | ITGB1  | Cardiometabolic | 1.19965  | 1.28075  | 1.2426   | 0.621273 | 0.684898 | -1.05948 | 0.459789 | 0.536502 | -1.00187 |
| OID20377 | CD55   | Cardiometabolic | 6.3024   | 6.86915  | 6.92805  | 0.00014  | 0.000543 | 1.701904 | 0.00061  | 0.002356 | 1.86995  |
| OID20378 | CD14   | Cardiometabolic | 5.59685  | 5.7712   | 5.77415  | 0.839867 | 0.872445 | -1.05041 | 0.350988 | 0.431079 | 1.062601 |
| OID20379 | SELP   | Cardiometabolic | 4.0772   | 4.3818   | 4.26325  | 0.000152 | 0.000582 | 1.667978 | 0.000822 | 0.002885 | 1.664397 |
| OID20380 | CD46   | Cardiometabolic | 7.25245  | 7.1737   | 7.12705  | 0.455167 | 0.529421 | 1.001596 | 0.134527 | 0.195644 | -1.01168 |
| OID20381 | GP1BA  | Cardiometabolic | -1.16945 | -0.2449  | -0.01785 | 0.000236 | 0.000853 | 2.012864 | 0.000207 | 0.000979 | 1.743516 |
| OID20382 | FCN2   | Cardiometabolic | -2.8608  | -1.86    | -1.8691  | 0.002828 | 0.006781 | 1.358157 | 0.001947 | 0.005829 | 1.712317 |
| OID20383 | HSPG2  | Cardiometabolic | 5.705    | 6.641    | 6.67665  | 6.56E-06 | 5.14E-05 | 1.949021 | 4.97E-05 | 0.000313 | 2.129626 |
| OID20384 | PCOLCE | Cardiometabolic | 3.7901   | 4.5169   | 4.65165  | 0.003888 | 0.00897  | 1.838017 | 0.004878 | 0.012602 | 2.055301 |
| OID20385 | IL6R   | Cardiometabolic | 2.965    | 3.269    | 3.19765  | 0.406543 | 0.481409 | -1.02076 | 0.086217 | 0.134469 | 1.118527 |
| OID20386 | SOD1   | Cardiometabolic | 3.73125  | 5.42175  | 5.3259   | 2.65E-05 | 0.000141 | 3.131057 | 0.000201 | 0.000956 | 3.113204 |
| OID20387 | FCGR3B | Cardiometabolic | 1.67225  | 2.47365  | 2.4362   | 0.000295 | 0.001019 | 1.49516  | 2.87E-05 | 0.000209 | 1.663821 |
| OID20388 | TFPI   | Cardiometabolic | 3.74955  | 2.41915  | 2.4627   | 7.11E-05 | 0.000309 | -2.28802 | 0.000117 | 0.000602 | -2.23605 |
| OID20389 | AOC3   | Cardiometabolic | 1.985    | 2.73405  | 2.67305  | 4.73E-05 | 0.000218 | 1.434452 | 6.55E-06 | 7.57E-05 | 1.595159 |



|          |        |                 |          |         |          |          |          |          |          |          |          |
|----------|--------|-----------------|----------|---------|----------|----------|----------|----------|----------|----------|----------|
| OID20390 | NRP1   | Cardiometabolic | 3.7178   | 4.15565 | 4.12915  | 0.002148 | 0.005403 | 1.409907 | 0.002469 | 0.007135 | 1.416765 |
| OID20391 | FCGR2A | Cardiometabolic | 3.4728   | 3.45195 | 3.63685  | 0.942555 | 0.951218 | 1.02445  | 0.313996 | 0.396284 | 1.076539 |
| OID20392 | LCN2   | Cardiometabolic | 4.64975  | 5.53615 | 5.53355  | 3.06E-06 | 3.23E-05 | 2.13739  | 7.73E-06 | 8.6E-05  | 2.113084 |
| OID20393 | CR2    | Cardiometabolic | -1.42455 | -1.1031 | -1.03005 | 0.562914 | 0.630693 | 1.051829 | 0.143131 | 0.204632 | 1.166835 |
| OID20394 | ADA2   | Cardiometabolic | 4.93755  | 4.95555 | 5.26325  | 0.273864 | 0.34513  | 1.062159 | 0.028155 | 0.051869 | 1.282314 |
| OID20395 | CCL18  | Cardiometabolic | 1.9845   | -0.5529 | 0.27055  | 0.000662 | 0.002029 | -3.1428  | 0.002629 | 0.007459 | -2.43142 |
| OID20396 | VCAM1  | Cardiometabolic | 2.3887   | 2.3568  | 2.6981   | 0.172114 | 0.234759 | -1.16091 | 0.306974 | 0.388763 | 1.202428 |
| OID20397 | CD93   | Cardiometabolic | 3.4242   | 3.31615 | 3.535    | 0.024077 | 0.043409 | -1.09126 | 0.422209 | 0.499016 | -1.04616 |
| OID20398 | IGFBP3 | Cardiometabolic | 1.63405  | 0.75055 | 1.1796   | 0.052747 | 0.084131 | -1.69261 | 0.069391 | 0.110904 | -1.28766 |
| OID20399 | CHI3L1 | Cardiometabolic | 5.25425  | 6.66085 | 6.76455  | 0.000108 | 0.000439 | 2.528795 | 0.000807 | 0.002852 | 2.378249 |
| OID20400 | CST3   | Cardiometabolic | -0.363   | 2.17575 | 1.90015  | 7.22E-06 | 5.47E-05 | 5.032063 | 5.34E-05 | 0.000331 | 4.868239 |
| OID20401 | CCL14  | Cardiometabolic | 5.77295  | 6.5745  | 6.58355  | 1.91E-07 | 5.38E-06 | 1.677078 | 1.97E-07 | 8.18E-06 | 1.82798  |
| OID20402 | PROC   | Cardiometabolic | 1.54985  | 0.8396  | 1.5852   | 0.028266 | 0.049897 | -1.28953 | 0.421708 | 0.498961 | 1.184066 |
| OID20403 | ANG    | Cardiometabolic | 1.4712   | 2.49175 | 2.57615  | 1.24E-05 | 8.04E-05 | 2.801598 | 8.9E-05  | 0.000499 | 2.680868 |
| OID20404 | FETUB  | Cardiometabolic | 1.8962   | 1.8226  | 2.1258   | 0.190877 | 0.256214 | -1.05019 | 0.830509 | 0.868475 | 1.054128 |
| OID20405 | COMP   | Cardiometabolic | 2.50455  | 2.99315 | 2.94815  | 0.001135 | 0.003154 | 1.319737 | 0.006357 | 0.015757 | 1.34355  |

|          |         |                 |          |         |         |          |          |          |          |          |          |
|----------|---------|-----------------|----------|---------|---------|----------|----------|----------|----------|----------|----------|
| OID20406 | DPP4    | Cardiometabolic | -0.341   | 0.7413  | 0.89215 | 0.008943 | 0.018491 | 1.383574 | 0.00262  | 0.007453 | 1.785094 |
| OID20407 | ANGPTL3 | Cardiometabolic | 2.27425  | 3.0448  | 2.9107  | 4.58E-07 | 1.01E-05 | 1.419468 | 4.71E-07 | 1.48E-05 | 1.612166 |
| OID20408 | PTGDS   | Cardiometabolic | 0.3557   | 2.10685 | 2.10855 | 2.41E-06 | 2.75E-05 | 3.152836 | 9.6E-06  | 0.0001   | 3.126178 |
| OID20409 | CA1     | Cardiometabolic | 0.62345  | 2.38135 | 1.78685 | 0.01127  | 0.022789 | 2.420408 | 0.137053 | 0.198006 | 1.500351 |
| OID20410 | C2      | Cardiometabolic | 0.67835  | 1.55205 | 1.65405 | 1.08E-06 | 1.56E-05 | 1.860126 | 4.28E-07 | 1.43E-05 | 2.005275 |
| OID20411 | ICAM1   | Cardiometabolic | 3.60225  | 3.8634  | 3.93415 | 0.125625 | 0.178212 | 1.185873 | 0.00875  | 0.020355 | 1.25867  |
| OID20412 | CCL5    | Cardiometabolic | -4.03585 | -2.8665 | -2.8601 | 0.001129 | 0.003147 | 2.015866 | 0.001688 | 0.005237 | 2.408859 |
| OID20413 | IGFBP6  | Cardiometabolic | 4.5702   | 6.02715 | 5.85675 | 5.89E-06 | 4.89E-05 | 2.937421 | 4.69E-05 | 0.000303 | 2.974609 |
| OID20414 | EFEMP1  | Cardiometabolic | 3.7855   | 5.61875 | 5.54455 | 3.12E-06 | 3.27E-05 | 3.239452 | 2.33E-05 | 0.000177 | 3.302137 |
| OID20415 | REG1A   | Cardiometabolic | 5.0667   | 5.99585 | 5.83845 | 0.000129 | 0.000512 | 1.904154 | 0.000925 | 0.003215 | 1.70214  |
| OID20416 | GGH     | Cardiometabolic | 4.6099   | 5.0561  | 5.18975 | 0.002183 | 0.005448 | 1.426223 | 0.001023 | 0.003487 | 1.637619 |
| OID20417 | TGFBI   | Cardiometabolic | 3.5308   | 4.4623  | 4.55525 | 0.021846 | 0.040046 | 1.287748 | 0.005519 | 0.013994 | 1.595435 |
| OID20418 | TIMP1   | Cardiometabolic | 4.5699   | 6.15955 | 6.1266  | 3.86E-05 | 0.000184 | 3.427009 | 0.000478 | 0.001929 | 3.567961 |
| OID20421 | PAPPA   | Inflammation    | 2.82195  | 2.73145 | 2.53825 | 0.225493 | 0.292579 | -1.14124 | 0.196767 | 0.266399 | -1.3223  |
| OID20422 | IL20RA  | Inflammation    | 0.7313   | 0.70235 | 0.7751  | 0.718075 | 0.772987 | 1.061975 | 0.608298 | 0.672619 | -1.12249 |
| OID20423 | EIF5A   | Inflammation    | -0.404   | 0.52125 | 0.55715 | 0.031899 | 0.055157 | 1.922855 | 0.190659 | 0.260054 | 1.999307 |

|          |        |                  |          |          |          |          |          |          |          |          |          |
|----------|--------|------------------|----------|----------|----------|----------|----------|----------|----------|----------|----------|
| OID20425 | RAB37  | Inflammat<br>ion | -1.4137  | -0.5069  | -0.3424  | 0.010021 | 0.020338 | 2.277262 | 0.015125 | 0.031693 | 2.552834 |
| OID20429 | LILRB4 | Inflammat<br>ion | -1.88105 | -1.66415 | -1.57035 | 0.571596 | 0.639117 | 1.043514 | 0.090448 | 0.139876 | 1.282714 |
| OID20430 | IL13   | Inflammat<br>ion | -5.16445 | -4.5561  | -3.81865 | 0.073816 | 0.11304  | 1.549551 | 0.001477 | 0.004688 | 2.693627 |
| OID20434 | LTO1   | Inflammat<br>ion | -0.91665 | -0.3177  | 0.18285  | 0.022147 | 0.040461 | 2.180335 | 0.009168 | 0.02106  | 2.698112 |
| OID20436 | LAP3   | Inflammat<br>ion | -3.9373  | -1.52915 | -1.2883  | 0.000181 | 0.000679 | 3.285698 | 0.000363 | 0.001544 | 4.568277 |
| OID20437 | AMBN   | Inflammat<br>ion | -1.5813  | 0.27585  | 0.12855  | 0.000622 | 0.001939 | 3.059615 | 0.00283  | 0.007926 | 2.85997  |
| OID20438 | LRRN1  | Inflammat<br>ion | -1.6395  | -2.1041  | -1.86525 | 0.002358 | 0.00578  | -1.18214 | 0.003838 | 0.010277 | -1.0295  |
| OID20442 | NBN    | Inflammat<br>ion | -2.6927  | -1.54655 | -1.85785 | 0.013102 | 0.026015 | 2.178825 | 0.126433 | 0.185841 | 1.90554  |
| OID20443 | FCRL3  | Inflammat<br>ion | -2.3414  | -1.494   | -1.7759  | 0.042654 | 0.070639 | 1.396872 | 0.105461 | 0.15928  | 1.219128 |
| OID20448 | NCLN   | Inflammat<br>ion | -0.22555 | 0.3515   | 0.1798   | 0.068122 | 0.105202 | 2.028973 | 0.187051 | 0.256087 | 2.008544 |
| OID20457 | SCGN   | Inflammat<br>ion | -1.59    | -1.18945 | -1.35925 | 0.036046 | 0.061267 | 1.377498 | 0.215366 | 0.287329 | 1.124279 |
| OID20458 | CXCL14 | Inflammat<br>ion | 1.23575  | 0.5367   | 0.365    | 0.16054  | 0.220341 | -1.31217 | 0.005424 | 0.013852 | -1.51987 |
| OID20459 | MVK    | Inflammat<br>ion | -3.6765  | -2.2896  | -2.56465 | 0.000177 | 0.000667 | 3.691993 | 0.000946 | 0.003266 | 2.813274 |
| OID20461 | IL3RA  | Inflammat<br>ion | -0.7875  | -0.31925 | 0.0827   | 0.036139 | 0.06133  | 1.490349 | 0.024229 | 0.046267 | 2.008544 |
| OID20462 | SIT1   | Inflammat<br>ion | -0.93915 | 0.0516   | 0.2112   | 0.020838 | 0.038606 | 1.40976  | 0.012971 | 0.028314 | 2.078078 |
| OID20465 | NRTN   | Inflammat<br>ion | -0.4911  | 1.1144   | 0.36805  | 0.000423 | 0.001394 | 3.201615 | 0.015816 | 0.032725 | 2.267339 |

|          |               |                  |          |          |          |          |          |          |          |          |          |
|----------|---------------|------------------|----------|----------|----------|----------|----------|----------|----------|----------|----------|
| OID20467 | PADI2         | Inflammat<br>ion | 0.04295  | -0.14685 | -0.53925 | 0.205181 | 0.272746 | -1.11973 | 0.004349 | 0.011396 | -1.45675 |
| OID20469 | IL17A         | Inflammat<br>ion | -3.41015 | -1.55815 | -2.17885 | 0.00067  | 0.002048 | 3.327296 | 0.006268 | 0.015588 | 2.555579 |
| OID20475 | SPRY2         | Inflammat<br>ion | 0.16375  | -0.0101  | -0.04565 | 0.72381  | 0.777322 | 1.023421 | 0.551219 | 0.6215   | -1.31731 |
| OID20480 | TNFRSF13<br>C | Inflammat<br>ion | -0.88415 | -1.06365 | -1.05495 | 0.274658 | 0.345372 | -1.04156 | 0.203844 | 0.27429  | -1.02947 |
| OID20481 | IL17D         | Inflammat<br>ion | 2.99095  | 0.7337   | 1.3505   | 1.15E-07 | 4.46E-06 | -4.54427 | 8.48E-07 | 2.18E-05 | -3.19164 |
| OID20482 | MILR1         | Inflammat<br>ion | -2.34815 | -2.649   | -2.24995 | 0.544789 | 0.61541  | -1.1113  | 0.937323 | 0.952064 | 1.081175 |
| OID20483 | PRDX3         | Inflammat<br>ion | -0.72515 | 0.92195  | 0.317    | 0.000674 | 0.002054 | 2.594488 | 0.014326 | 0.03051  | 1.52119  |
| OID20485 | IRAK1         | Inflammat<br>ion | -2.6334  | -1.6866  | -1.7051  | 0.022106 | 0.040454 | 1.607646 | 0.042132 | 0.072851 | 1.539114 |
| OID20486 | IL12RB1       | Inflammat<br>ion | -2.77555 | -2.11915 | -2.3846  | 0.02894  | 0.050761 | 1.636655 | 0.095849 | 0.146373 | 1.26164  |
| OID20487 | IL1RL2        | Inflammat<br>ion | -4.34245 | -4.1196  | -4.10525 | 0.914885 | 0.929272 | 1.12783  | 0.72502  | 0.779698 | 1.178703 |
| OID20488 | IL1A          | Inflammat<br>ion | -0.813   | 1.06085  | 1.6632   | 0.005765 | 0.012584 | 2.695681 | 0.007586 | 0.018108 | 2.729052 |
| OID20490 | FGF5          | Inflammat<br>ion | -3.59125 | -3.2666  | -3.1278  | 0.150858 | 0.208881 | 1.421732 | 0.543092 | 0.614124 | 1.243581 |
| OID20491 | CSF3          | Inflammat<br>ion | -4.08325 | -3.50525 | -2.72395 | 0.01386  | 0.027127 | 1.858257 | 0.000696 | 0.002551 | 2.532391 |
| OID20498 | IL15RA        | Inflammat<br>ion | -3.0176  | -1.98695 | -2.2524  | 0.043036 | 0.071165 | 1.657203 | 0.349442 | 0.429661 | 1.241126 |
| OID20501 | FABP9         | Inflammat<br>ion | -3.6842  | -3.17775 | -3.0697  | 0.049759 | 0.079877 | 1.243107 | 0.06744  | 0.108736 | 1.185339 |
| OID20504 | ITM2A         | Inflammat<br>ion | -0.6425  | -1.42805 | -1.0485  | 0.000486 | 0.00158  | -1.26835 | 0.089404 | 0.138651 | -1.36051 |

|          |         |                  |          |          |          |          |          |          |          |          |          |
|----------|---------|------------------|----------|----------|----------|----------|----------|----------|----------|----------|----------|
| OID20506 | IFNLR1  | Inflammat<br>ion | -0.70005 | -0.82785 | -0.8497  | 0.183832 | 0.248275 | -1.05636 | 0.232198 | 0.306067 | -1.12818 |
| OID20508 | SULT2A1 | Inflammat<br>ion | -2.3611  | -1.78845 | -1.72815 | 0.01333  | 0.026372 | 1.838781 | 0.004015 | 0.010696 | 2.008544 |
| OID20509 | SPINK4  | Inflammat<br>ion | 4.4171   | 4.7346   | 4.4366   | 0.328865 | 0.400326 | 1.304458 | 0.476399 | 0.554116 | 1.264047 |
| OID20510 | NUB1    | Inflammat<br>ion | -3.80645 | -2.7302  | -2.7283  | 0.003823 | 0.008856 | 1.845933 | 0.009874 | 0.022354 | 1.75747  |
| OID20511 | PSPN    | Inflammat<br>ion | -4.55435 | -4.574   | -4.0938  | 0.049685 | 0.079874 | 1.479746 | 0.029633 | 0.054229 | 1.79185  |
| OID20512 | ALDH3A1 | Inflammat<br>ion | 1.0631   | 5.8351   | 4.94285  | 6.7E-05  | 0.000294 | 26.24735 | 0.002125 | 0.006256 | 15.70661 |
| OID20513 | BCL2L11 | Inflammat<br>ion | 0.92765  | 1.3868   | 1.29915  | 0.020249 | 0.037749 | 1.374732 | 0.038595 | 0.067479 | 1.388378 |
| OID20520 | HLA-DRA | Inflammat<br>ion | 1.766    | 0.78865  | 1.27365  | 5.19E-06 | 4.56E-05 | -2.10089 | 0.000444 | 0.001818 | -1.72273 |
| OID20522 | EPO     | Inflammat<br>ion | 0.4091   | -1.16515 | -0.50245 | 2.75E-05 | 0.000144 | -2.08204 | 0.000298 | 0.00134  | -1.75115 |
| OID20523 | CCL7    | Inflammat<br>ion | -3.63765 | -2.4932  | -3.2355  | 0.286286 | 0.357613 | 1.538474 | 0.40199  | 0.480421 | 1.079153 |
| OID20525 | EDAR    | Inflammat<br>ion | -3.45525 | -3.03245 | -2.995   | 0.211499 | 0.278449 | 1.441929 | 0.298435 | 0.379262 | 1.417796 |
| OID20527 | DPP10   | Inflammat<br>ion | 2.34085  | 1.7245   | 1.58135  | 0.006738 | 0.014478 | -1.24229 | 0.00077  | 0.002782 | -1.2967  |
| OID20530 | LSP1    | Inflammat<br>ion | -2.41055 | -2.974   | -3.44125 | 0.00315  | 0.007437 | -1.56255 | 0.000968 | 0.003323 | -1.77732 |
| OID20531 | STX8    | Inflammat<br>ion | -0.67765 | -0.676   | -0.9579  | 0.501545 | 0.57544  | 1.002568 | 0.110171 | 0.166164 | -1.06463 |
| OID20533 | TRIM21  | Inflammat<br>ion | -4.2484  | -4.22595 | -4.93335 | 0.803776 | 0.843734 | 1.063928 | 0.06225  | 0.102321 | -1.26822 |
| OID20535 | IL7     | Inflammat<br>ion | 2.56075  | 1.77945  | 1.98425  | 0.000136 | 0.000533 | -1.72937 | 0.001864 | 0.00567  | -1.52536 |

|          |              |                  |          |          |          |          |          |          |          |          |          |
|----------|--------------|------------------|----------|----------|----------|----------|----------|----------|----------|----------|----------|
| OID20537 | SIGLEC10     | Inflammat<br>ion | -1.98085 | -2.05965 | -2.21035 | 0.166273 | 0.227925 | -1.02218 | 0.893459 | 0.92028  | -1.17243 |
| OID20538 | ISM1         | Inflammat<br>ion | -4.8989  | -6.30475 | -6.4541  | 7.71E-07 | 1.28E-05 | -3.34928 | 1.26E-07 | 6.94E-06 | -3.52238 |
| OID20540 | BTN3A2       | Inflammat<br>ion | -1.22555 | -2.02055 | -1.66745 | 0.054045 | 0.085507 | -1.51761 | 0.454713 | 0.531144 | -1.34471 |
| OID20542 | SCRN1        | Inflammat<br>ion | -0.26965 | -1.22795 | -1.23905 | 0.002323 | 0.005719 | -1.81623 | 0.000612 | 0.002356 | -2.2931  |
| OID20548 | CEACAM2<br>1 | Inflammat<br>ion | -4.6111  | -4.114   | -4.09805 | 0.037887 | 0.063511 | 1.648381 | 0.165879 | 0.231136 | 1.162677 |
| OID20550 | COL9A1       | Inflammat<br>ion | -1.6017  | -1.56335 | -1.2537  | 0.176291 | 0.239822 | 1.076054 | 0.203435 | 0.274075 | 1.045614 |
| OID20556 | CNTNAP2      | Inflammat<br>ion | 6.5171   | 6.34205  | 6.29315  | 0.13603  | 0.191244 | -1.00979 | 0.013438 | 0.029188 | -1.14175 |
| OID20560 | SELPLG       | Inflammat<br>ion | -4.1718  | -4.2851  | -4.1837  | 0.671349 | 0.728083 | -1.05625 | 0.780227 | 0.827719 | 1.053361 |
| OID20561 | CXADR        | Inflammat<br>ion | -0.3948  | -0.7592  | -0.71665 | 0.02269  | 0.041317 | -1.23705 | 0.018965 | 0.038208 | -1.19615 |
| OID20562 | IL15         | Inflammat<br>ion | -0.2888  | -0.4342  | -0.3078  | 0.200803 | 0.26725  | -1.27859 | 0.586655 | 0.652632 | -1.20556 |
| OID20563 | IL6          | Inflammat<br>ion | -0.11635 | 0.1358   | 0.79905  | 0.407312 | 0.481409 | 1.214532 | 0.072083 | 0.114541 | 1.563631 |
| OID20564 | FCAR         | Inflammat<br>ion | -2.3787  | -1.88535 | -2.24425 | 0.037107 | 0.062539 | 1.153366 | 0.032594 | 0.058477 | 1.154445 |
| OID20565 | CD83         | Inflammat<br>ion | -0.2024  | -0.46755 | -0.5227  | 0.595636 | 0.659948 | -1.05008 | 0.335807 | 0.418414 | 1.047137 |
| OID20566 | NCR1         | Inflammat<br>ion | -4.22865 | -3.54145 | -3.71125 | 0.13183  | 0.186053 | 1.364384 | 0.284564 | 0.364588 | 1.241126 |
| OID20567 | NCF2         | Inflammat<br>ion | -6.99905 | -7.2407  | -7.0723  | 0.411646 | 0.484446 | -1.1113  | 0.820043 | 0.859167 | -1.093   |
| OID20568 | NPPC         | Inflammat<br>ion | 3.51165  | 3.63245  | 3.33445  | 0.550721 | 0.621472 | 1.11632  | 0.213857 | 0.286011 | -1.09331 |

|          |               |                  |          |          |          |          |          |          |          |          |          |
|----------|---------------|------------------|----------|----------|----------|----------|----------|----------|----------|----------|----------|
| OID20569 | CCL28         | Inflammat<br>ion | -0.6838  | -0.00035 | -0.1038  | 0.021708 | 0.039913 | 1.59859  | 0.020164 | 0.040181 | 1.560924 |
| OID20570 | PTX3          | Inflammat<br>ion | -2.7987  | -2.56285 | -2.92645 | 0.893042 | 0.915556 | -1.02559 | 0.563751 | 0.63263  | 1.083463 |
| OID20571 | PTH1R         | Inflammat<br>ion | -3.3569  | -2.82925 | -2.76895 | 0.077785 | 0.118453 | 1.58447  | 0.202049 | 0.272543 | 1.299809 |
| OID20572 | EGLN1         | Inflammat<br>ion | -3.2779  | -3.13575 | -3.3408  | 0.056108 | 0.088516 | 1.1776   | 0.135801 | 0.196871 | 1.241126 |
| OID20573 | CLEC4A        | Inflammat<br>ion | -4.84415 | -4.6899  | -4.32595 | 0.66044  | 0.717273 | 1.175154 | 0.52235  | 0.5925   | 1.556872 |
| OID20574 | OSM           | Inflammat<br>ion | -5.4422  | -4.70315 | -4.54605 | 0.002242 | 0.005567 | 1.868979 | 9.32E-05 | 0.000508 | 2.313537 |
| OID20576 | IL4R          | Inflammat<br>ion | -3.58585 | -3.8316  | -3.9528  | 0.041506 | 0.068946 | -1.3583  | 0.066823 | 0.107899 | -1.08523 |
| OID20580 | LY75          | Inflammat<br>ion | -3.31365 | -3.47485 | -3.4566  | 0.225431 | 0.292579 | -1.12218 | 0.666126 | 0.725587 | -1.09194 |
| OID20584 | CD4           | Inflammat<br>ion | -3.09095 | -3.3417  | -3.12605 | 0.113532 | 0.163808 | -1.35712 | 0.867687 | 0.897946 | -1.13508 |
| OID20585 | IL17RB        | Inflammat<br>ion | -1.6646  | -2.89405 | -2.8304  | 1.59E-05 | 9.63E-05 | -2.1536  | 1.38E-05 | 0.000123 | -2.30561 |
| OID20586 | LTA           | Inflammat<br>ion | -4.81555 | -4.80475 | -4.3939  | 0.182725 | 0.247084 | -1.08621 | 0.016895 | 0.034709 | 1.388378 |
| OID20589 | HEXIM1        | Inflammat<br>ion | -3.36845 | -2.8563  | -2.92855 | 0.101507 | 0.148805 | 1.421191 | 0.159319 | 0.222844 | 1.219128 |
| OID20593 | MICB_MI<br>CA | Inflammat<br>ion | -2.05595 | -1.92615 | -2.11885 | 0.141464 | 0.198375 | -1.32708 | 0.584813 | 0.651242 | -1.16894 |
| OID20595 | CD200R1       | Inflammat<br>ion | -7.08035 | -6.3784  | -6.5463  | 0.039656 | 0.066073 | 1.1776   | 0.070291 | 0.112179 | 1.241126 |
| OID20596 | KRT19         | Inflammat<br>ion | -3.40505 | -2.189   | -2.74595 | 7.83E-05 | 0.000337 | 2.40219  | 0.025621 | 0.048033 | 1.70102  |
| OID20597 | PLXNA4        | Inflammat<br>ion | 0.8233   | -0.69455 | -0.93195 | 2.14E-05 | 0.000119 | -2.5169  | 3.79E-06 | 5.2E-05  | -2.57844 |

|          |         |                  |          |          |          |          |          |          |          |          |          |
|----------|---------|------------------|----------|----------|----------|----------|----------|----------|----------|----------|----------|
| OID20598 | PTPRM   | Inflammat<br>ion | -4.7736  | -4.52055 | -4.56115 | 0.697651 | 0.753957 | 1.091226 | 0.875985 | 0.90568  | 1.436542 |
| OID20599 | CD70    | Inflammat<br>ion | -6.37215 | -5.77165 | -5.44345 | 0.219688 | 0.286822 | -1.02883 | 0.066414 | 0.107543 | 1.79036  |
| OID20600 | TGFA    | Inflammat<br>ion | 0.21635  | 0.2434   | 0.17345  | 0.109243 | 0.158873 | 1.287034 | 0.288087 | 0.368671 | -1.08192 |
| OID20601 | IL5RA   | Inflammat<br>ion | -5.3181  | -5.73685 | -5.5641  | 0.207369 | 0.274434 | -1.48324 | 0.935914 | 0.951512 | -1.21887 |
| OID20603 | CD200   | Inflammat<br>ion | 1.756    | 0.932    | 1.0417   | 0.000815 | 0.00243  | -1.35693 | 0.000324 | 0.001399 | -1.46739 |
| OID20604 | GZMB    | Inflammat<br>ion | -5.78185 | -2.89355 | -3.82955 | 3.17E-07 | 7.73E-06 | 4.405635 | 2.58E-06 | 3.93E-05 | 6.391701 |
| OID20606 | LIFR    | Inflammat<br>ion | -3.79    | -4.8413  | -4.4315  | 2.27E-05 | 0.000126 | -1.94929 | 0.004066 | 0.010785 | -1.5495  |
| OID20607 | CD84    | Inflammat<br>ion | -5.0646  | -4.85755 | -5.02745 | 0.809904 | 0.848209 | 1.154325 | 0.744813 | 0.797081 | 1.195157 |
| OID20609 | CLEC4D  | Inflammat<br>ion | -0.4408  | -0.63305 | -0.7436  | 0.749791 | 0.79697  | -1.01621 | 0.402538 | 0.480421 | -1.1475  |
| OID20610 | CCL3    | Inflammat<br>ion | -4.4018  | -4.3362  | -4.11385 | 0.552133 | 0.622281 | -1.02979 | 0.361921 | 0.442527 | 1.012414 |
| OID20611 | TNFSF10 | Inflammat<br>ion | -6.47025 | -6.9297  | -7.05145 | 0.064499 | 0.100454 | -1.73345 | 0.012507 | 0.027411 | -1.57309 |
| OID20612 | TLR3    | Inflammat<br>ion | 1.97395  | 1.85655  | 1.8531   | 0.73497  | 0.785591 | -1.14088 | 0.899524 | 0.923063 | 1.031683 |
| OID20614 | PCDH1   | Inflammat<br>ion | -1.4962  | -1.40155 | -1.50705 | 0.595169 | 0.659948 | 1.04623  | 0.421616 | 0.498961 | 1.087338 |
| OID20615 | HPCAL1  | Inflammat<br>ion | -4.5505  | -4.79755 | -4.9292  | 0.21593  | 0.283602 | -1.23602 | 0.195839 | 0.26547  | -1.34471 |
| OID20617 | CKAP4   | Inflammat<br>ion | -0.7355  | -2.71205 | -2.4907  | 6.45E-06 | 5.13E-05 | -3.38792 | 3.7E-06  | 5.14E-05 | -3.70173 |
| OID20619 | IDS     | Inflammat<br>ion | 0.61845  | 1.01975  | 1.17605  | 0.01527  | 0.029414 | 1.528377 | 0.032827 | 0.058799 | 1.675626 |



|          |          |                  |          |          |          |          |          |          |          |          |          |
|----------|----------|------------------|----------|----------|----------|----------|----------|----------|----------|----------|----------|
| OID20620 | DFFA     | Inflammat<br>ion | -3.64985 | -4.3469  | -4.15265 | 0.909923 | 0.925813 | -1.23876 | 0.700083 | 0.755842 | -1.25518 |
| OID20621 | TGFB1    | Inflammat<br>ion | -5.6586  | -5.55995 | -5.15995 | 0.643345 | 0.705687 | 1.119768 | 0.008459 | 0.019846 | 1.291099 |
| OID20622 | CXCL17   | Inflammat<br>ion | -2.6134  | -3.23185 | -3.24645 | 0.951232 | 0.958214 | -1.12043 | 0.569976 | 0.636657 | -1.05863 |
| OID20623 | NUDC     | Inflammat<br>ion | -5.85625 | -6.0086  | -5.7745  | 0.987272 | 0.987272 | -1.1113  | 0.386906 | 0.466326 | 1.020517 |
| OID20624 | TNFSF12  | Inflammat<br>ion | 2.8452   | 2.22175  | 2.0978   | 0.001383 | 0.00374  | -1.66342 | 0.000154 | 0.000768 | -1.49319 |
| OID20625 | EIF4G1   | Inflammat<br>ion | -4.88855 | -4.45155 | -4.33455 | 0.075555 | 0.115542 | 1.448992 | 0.227328 | 0.30161  | 1.516978 |
| OID20626 | BSG      | Inflammat<br>ion | -0.0844  | -0.3676  | -0.5196  | 0.085333 | 0.128175 | -1.10723 | 0.008483 | 0.019861 | -1.13579 |
| OID20627 | DNAJA2   | Inflammat<br>ion | -3.49605 | -3.04495 | -3.11985 | 0.048154 | 0.078099 | 1.288149 | 0.413044 | 0.49035  | 1.134534 |
| OID20628 | CD244    | Inflammat<br>ion | -5.02685 | -4.85525 | -5.02505 | 0.528414 | 0.599998 | 1.160382 | 0.789576 | 0.834349 | 1.008492 |
| OID20629 | KLRB1    | Inflammat<br>ion | -5.4875  | -5.05125 | -4.9577  | 0.157776 | 0.21709  | 1.142703 | 0.035052 | 0.062175 | 1.140606 |
| OID20630 | SERPINB8 | Inflammat<br>ion | -2.94295 | -1.99055 | -2.37955 | 1.26E-05 | 8.11E-05 | 1.528165 | 0.001635 | 0.005116 | 1.779905 |
| OID20631 | CXCL8    | Inflammat<br>ion | 0.1215   | 0.60075  | 0.6379   | 0.035197 | 0.060104 | 1.296345 | 0.016914 | 0.034709 | 1.229695 |
| OID20632 | KLRD1    | Inflammat<br>ion | -7.28635 | -7.23065 | -6.7525  | 0.654045 | 0.712442 | -1.19433 | 0.482663 | 0.559624 | 1.298189 |
| OID20633 | IL16     | Inflammat<br>ion | -5.7923  | -5.42175 | -5.3788  | 0.266441 | 0.33782  | 1.089752 | 0.216276 | 0.287844 | 1.275931 |
| OID20634 | NFASC    | Inflammat<br>ion | 1.56225  | 1.74475  | 1.77655  | 0.008877 | 0.018391 | 1.274958 | 0.006275 | 0.015588 | 1.355476 |
| OID20635 | CD79B    | Inflammat<br>ion | -5.4918  | -4.9476  | -4.736   | 0.052896 | 0.084174 | 1.196027 | 0.008991 | 0.020783 | 1.32464  |

|          |               |                  |          |          |          |          |          |          |          |          |          |
|----------|---------------|------------------|----------|----------|----------|----------|----------|----------|----------|----------|----------|
| OID20636 | CLEC7A        | Inflammat<br>ion | -0.41005 | -0.59905 | -0.57725 | 0.120914 | 0.172645 | -1.14969 | 0.389241 | 0.468113 | -1.10726 |
| OID20637 | CD22          | Inflammat<br>ion | -7.2086  | -7.10405 | -6.91885 | 0.533655 | 0.604699 | 1.04968  | 0.73497  | 0.787314 | 1.233194 |
| OID20638 | LAMP3         | Inflammat<br>ion | -7.7052  | -6.6222  | -6.8675  | 0.001485 | 0.003957 | 1.939184 | 0.007755 | 0.018392 | 1.801252 |
| OID20641 | GMPR          | Inflammat<br>ion | -2.7476  | -1.08225 | -1.0081  | 0.003219 | 0.007553 | 2.449946 | 0.001948 | 0.005829 | 2.695401 |
| OID20642 | TPSAB1        | Inflammat<br>ion | -6.61895 | -6.27055 | -5.86405 | 0.142975 | 0.200239 | 1.273148 | 0.016084 | 0.033133 | 2.433445 |
| OID20643 | PPP1R9B       | Inflammat<br>ion | -4.27765 | -4.3047  | -4.2659  | 0.658158 | 0.715502 | 1.521242 | 0.92463  | 0.941784 | -1.29092 |
| OID20645 | ADA           | Inflammat<br>ion | -4.40305 | -3.64875 | -3.74165 | 8.01E-05 | 0.000344 | 1.547136 | 0.00078  | 0.002809 | 1.526471 |
| OID20646 | TNFRSF11<br>A | Inflammat<br>ion | -2.77375 | -2.864   | -2.7778  | 0.635403 | 0.699771 | -1.01248 | 0.67977  | 0.737537 | -1.02151 |
| OID20647 | CD160         | Inflammat<br>ion | -5.73765 | -5.4174  | -5.27805 | 0.287076 | 0.357786 | 1.209701 | 0.012956 | 0.028314 | 1.388233 |
| OID20649 | CD6           | Inflammat<br>ion | -8.0597  | -7.75905 | -7.4901  | 0.284762 | 0.356114 | 1.711724 | 0.075836 | 0.119943 | 1.56857  |
| OID20650 | VEGFA         | Inflammat<br>ion | 0.9764   | -0.12615 | 0.0236   | 5.56E-05 | 0.000251 | -2.01224 | 0.000319 | 0.001393 | -1.78151 |
| OID20651 | ADAM23        | Inflammat<br>ion | -2.0002  | -3.74925 | -3.68225 | 1.39E-09 | 2.47E-07 | -3.40428 | 1.65E-08 | 2.26E-06 | -2.98225 |
| OID20652 | IL18R1        | Inflammat<br>ion | -5.2108  | -5.08895 | -5.3255  | 0.175144 | 0.238595 | 1.140092 | 0.334142 | 0.416918 | -1.0572  |
| OID20653 | TNFRSF4       | Inflammat<br>ion | -5.16505 | -4.37915 | -4.38605 | 0.001189 | 0.003279 | 1.496041 | 0.001069 | 0.003566 | 1.309213 |
| OID20654 | C1QA          | Inflammat<br>ion | -3.46565 | -4.5033  | -4.0893  | 5.42E-05 | 0.000247 | -1.94767 | 0.024581 | 0.046615 | -1.59649 |
| OID20656 | HGF           | Inflammat<br>ion | 3.45475  | 1.93805  | 2.22985  | 7.13E-08 | 3.26E-06 | -2.62934 | 2.84E-06 | 4.23E-05 | -2.68068 |

|          |        |                  |          |          |          |          |          |          |          |          |          |
|----------|--------|------------------|----------|----------|----------|----------|----------|----------|----------|----------|----------|
| OID20657 | MERTK  | Inflammat<br>ion | -4.51565 | -5.9948  | -5.467   | 9.91E-05 | 0.000406 | -2.03941 | 0.003195 | 0.008838 | -1.89612 |
| OID20658 | AGRP   | Inflammat<br>ion | -1.8363  | -3.57595 | -4.0345  | 2.05E-05 | 0.000116 | -3.13453 | 1.05E-06 | 2.38E-05 | -3.7218  |
| OID20660 | CTSO   | Inflammat<br>ion | 1.73265  | 1.1885   | 1.3656   | 0.016895 | 0.031985 | -1.29563 | 0.047687 | 0.080802 | -1.18954 |
| OID20661 | FLT3LG | Inflammat<br>ion | -1.5365  | -1.5026  | -1.36205 | 0.789571 | 0.832148 | 1        | 0.405197 | 0.483068 | 1.121166 |
| OID20662 | VEGFD  | Inflammat<br>ion | -8.64545 | -9.7392  | -9.1256  | 0.001855 | 0.004769 | -1.67725 | 0.123422 | 0.182393 | -1.41069 |
| OID20663 | GZMA   | Inflammat<br>ion | -5.317   | -4.95785 | -4.18775 | 0.016305 | 0.031136 | 1.307173 | 0.002034 | 0.006052 | 2.159803 |
| OID20664 | CLSTN2 | Inflammat<br>ion | 3.5487   | 3.64245  | 3.73995  | 0.086399 | 0.128895 | 1.122138 | 0.009977 | 0.022541 | 1.27253  |
| OID20665 | FASLG  | Inflammat<br>ion | -6.338   | -5.53315 | -5.92815 | 0.006912 | 0.014823 | 1.501704 | 0.003204 | 0.00884  | 1.585348 |
| OID20666 | IL12B  | Inflammat<br>ion | -4.98965 | -3.8454  | -3.52945 | 9.27E-05 | 0.000387 | 1.709116 | 4.18E-06 | 5.53E-05 | 1.898553 |
| OID20667 | CDSN   | Inflammat<br>ion | -4.6989  | -4.12625 | -4.40775 | 0.437747 | 0.510782 | 1.1776   | 0.349237 | 0.429661 | 1.265493 |
| OID20668 | CCL11  | Inflammat<br>ion | -6.8499  | -7.8764  | -7.54475 | 0.001759 | 0.004545 | -1.8377  | 0.00961  | 0.021892 | -1.54355 |
| OID20669 | KYNU   | Inflammat<br>ion | -5.87685 | -4.6439  | -4.2448  | 0.031045 | 0.053851 | 1.90587  | 0.009507 | 0.021701 | 2.846916 |
| OID20670 | LY9    | Inflammat<br>ion | -7.0326  | -6.495   | -6.26935 | 0.079892 | 0.120662 | 1.263828 | 0.05018  | 0.084376 | 1.659444 |
| OID20671 | CCL20  | Inflammat<br>ion | -5.00875 | -5.1361  | -5.55015 | 0.900389 | 0.92051  | -1.11199 | 0.238235 | 0.311407 | -1.45538 |
| OID20672 | MMP1   | Inflammat<br>ion | -3.2775  | -3.02005 | -2.8872  | 0.003192 | 0.007522 | 1.550464 | 0.000594 | 0.002309 | 1.552722 |
| OID20673 | PGF    | Inflammat<br>ion | -3.20005 | -4.53755 | -4.5167  | 3.47E-05 | 0.00017  | -2.8567  | 0.000473 | 0.001916 | -2.01768 |

|          |         |                  |          |          |          |          |          |          |          |          |          |
|----------|---------|------------------|----------|----------|----------|----------|----------|----------|----------|----------|----------|
| OID20674 | CCL25   | Inflammat<br>ion | -6.3784  | -6.50165 | -6.3352  | 0.122392 | 0.174076 | -1.26387 | 0.366093 | 0.446633 | -1.17952 |
| OID20675 | CXCL9   | Inflammat<br>ion | 0.29195  | 0.83035  | 0.94135  | 0.035902 | 0.061117 | 1.249846 | 0.022847 | 0.044386 | 1.369263 |
| OID20676 | SMPDL3A | Inflammat<br>ion | 1.31175  | 1.443    | 1.52255  | 0.557539 | 0.625996 | 1.138512 | 0.964567 | 0.972539 | 1.041852 |
| OID20677 | EPHA1   | Inflammat<br>ion | -3.90355 | -4.31265 | -3.94275 | 0.001584 | 0.004171 | -1.41603 | 0.423125 | 0.49956  | -1.04522 |
| OID20678 | IFNGR1  | Inflammat<br>ion | 1.60025  | 1.38405  | 1.291    | 0.021738 | 0.039913 | -1.0896  | 0.018292 | 0.036947 | -1.13391 |
| OID20679 | CTSC    | Inflammat<br>ion | 2.7979   | 2.17315  | 2.48675  | 1.4E-05  | 8.81E-05 | -1.56879 | 0.140887 | 0.20195  | -1.19897 |
| OID20680 | CD276   | Inflammat<br>ion | -1.77405 | -3.26765 | -2.65155 | 3.04E-06 | 3.23E-05 | -2.64368 | 0.000509 | 0.002045 | -1.80801 |
| OID20681 | DBNL    | Inflammat<br>ion | -3.1078  | -2.34505 | -2.54665 | 2.73E-05 | 0.000144 | 1.553853 | 0.000957 | 0.003292 | 1.415341 |
| OID20684 | TIMP3   | Inflammat<br>ion | 5.1115   | 0.91805  | 0.9212   | 3.91E-10 | 1.43E-07 | -15.9341 | 5.49E-10 | 1.51E-07 | -14.8023 |
| OID20685 | PLA2G4A | Inflammat<br>ion | -3.28975 | -2.822   | -2.89805 | 0.009006 | 0.018553 | 1.345554 | 0.027215 | 0.050391 | 1.27306  |
| OID20686 | CCL21   | Inflammat<br>ion | -1.32875 | -0.7936  | -0.6153  | 0.000131 | 0.000516 | 1.497701 | 3.68E-06 | 5.14E-05 | 1.604362 |
| OID20687 | MMP10   | Inflammat<br>ion | 0.8338   | 0.7445   | 0.8891   | 0.023394 | 0.042318 | -1.4711  | 0.15745  | 0.221074 | -1.06186 |
| OID20688 | SCGB1A1 | Inflammat<br>ion | -0.28725 | -0.29435 | -0.26405 | 0.013366 | 0.026396 | 1.248287 | 0.001312 | 0.004267 | 1.499415 |
| OID20689 | ENPP7   | Inflammat<br>ion | -3.5575  | -3.28295 | -2.92725 | 0.007956 | 0.016767 | 1.407905 | 0.000707 | 0.002578 | 1.597815 |
| OID20690 | SIGLEC1 | Inflammat<br>ion | -2.6691  | -2.62595 | -2.27505 | 0.14944  | 0.207178 | 1.030361 | 0.056352 | 0.093749 | 1.222005 |
| OID20691 | F2R     | Inflammat<br>ion | -0.36675 | 0.24985  | 0.1319   | 0.392982 | 0.467998 | 1.376925 | 0.156112 | 0.220157 | 1.266942 |

|          |               |                  |          |          |          |          |          |          |          |          |          |
|----------|---------------|------------------|----------|----------|----------|----------|----------|----------|----------|----------|----------|
| OID20692 | CD48          | Inflammat<br>ion | -2.8348  | -2.80705 | -2.5472  | 0.795905 | 0.836272 | -1.14429 | 0.026497 | 0.049479 | 1.128495 |
| OID20693 | CCL23         | Inflammat<br>ion | -3.3866  | -3.898   | -4.08235 | 0.013699 | 0.026947 | -1.46932 | 0.025295 | 0.04788  | -1.60943 |
| OID20694 | IL18          | Inflammat<br>ion | -5.2804  | -3.74495 | -4.18775 | 0.000244 | 0.000877 | 2.069741 | 0.003727 | 0.010031 | 2.321086 |
| OID20695 | CCL4          | Inflammat<br>ion | -0.4932  | -0.2603  | -0.19405 | 0.083096 | 0.125156 | 1.251016 | 0.018015 | 0.03663  | 1.338391 |
| OID20696 | IL10RB        | Inflammat<br>ion | -0.83555 | -0.9011  | -0.8229  | 0.128568 | 0.181684 | -1.04359 | 0.580742 | 0.648024 | -1.02569 |
| OID20697 | CXCL10        | Inflammat<br>ion | -1.7184  | -2.955   | -2.70695 | 0.301761 | 0.373966 | -3.06216 | 0.677463 | 0.735761 | -2.40761 |
| OID20698 | EGF           | Inflammat<br>ion | -2.08515 | -2.25895 | -1.88865 | 0.810357 | 0.848209 | 1.006781 | 0.377926 | 0.457008 | 1.18649  |
| OID20699 | CRLF1         | Inflammat<br>ion | -0.41285 | -0.13145 | -0.13555 | 0.004341 | 0.009931 | 1.310348 | 0.001924 | 0.005803 | 1.249759 |
| OID20700 | IL1RN         | Inflammat<br>ion | -2.3713  | 1.07015  | 0.03545  | 4.54E-05 | 0.000211 | 8.301373 | 0.000936 | 0.003242 | 4.554207 |
| OID20701 | CRIM1         | Inflammat<br>ion | 4.7787   | 4.16155  | 4.1432   | 0.000481 | 0.001571 | -1.39857 | 0.000542 | 0.002163 | -1.31376 |
| OID20702 | TNFRSF13<br>B | Inflammat<br>ion | -3.21095 | -3.34595 | -3.23565 | 0.910636 | 0.925813 | -1.12596 | 0.592319 | 0.6576   | -1.37545 |
| OID20703 | ANGPTL4       | Inflammat<br>ion | -0.3679  | -0.6302  | -0.3791  | 0.918071 | 0.931647 | -1.23093 | 0.040607 | 0.070436 | 1.194577 |
| OID20704 | CST7          | Inflammat<br>ion | -2.37185 | -2.44515 | -2.11865 | 0.843929 | 0.874684 | -1.08828 | 0.031211 | 0.056272 | 1.125331 |
| OID20705 | ERBB3         | Inflammat<br>ion | -2.38155 | -2.70945 | -2.5654  | 0.005435 | 0.012032 | -1.2438  | 0.010491 | 0.023509 | -1.16143 |
| OID20706 | NELL2         | Inflammat<br>ion | 1.7861   | 2.31375  | 2.606    | 0.000459 | 0.001504 | 1.577948 | 0.000121 | 0.000618 | 1.775346 |
| OID20707 | MANF          | Inflammat<br>ion | -0.58525 | -0.2936  | -0.08415 | 0.307931 | 0.380324 | 1.24509  | 0.014538 | 0.030816 | 1.449143 |

|          |                   |                  |          |          |          |          |          |          |          |          |          |
|----------|-------------------|------------------|----------|----------|----------|----------|----------|----------|----------|----------|----------|
| OID20708 | LY6D              | Inflammat<br>ion | -0.5523  | -0.2455  | -0.13355 | 0.004493 | 0.010193 | 1.270988 | 0.000425 | 0.001762 | 1.402159 |
| OID20709 | CCN2              | Inflammat<br>ion | 1.02845  | 1.23085  | 1.1272   | 0.907881 | 0.925583 | 1.173648 | 0.760012 | 0.809402 | -1.20748 |
| OID20710 | GLOD4             | Inflammat<br>ion | 0.49755  | 1.2134   | 1.0219   | 6.4E-07  | 1.2E-05  | 1.726799 | 0.000308 | 0.001369 | 1.449495 |
| OID20711 | MGLL              | Inflammat<br>ion | -4.3945  | -3.93475 | -4.0127  | 0.004778 | 0.010728 | 1.551754 | 0.017941 | 0.036548 | 1.234391 |
| OID20712 | DNER              | Inflammat<br>ion | 2.52385  | 2.24865  | 2.32195  | 0.000396 | 0.001317 | -1.19557 | 9.93E-05 | 0.000527 | -1.20932 |
| OID20713 | BTN2A1            | Inflammat<br>ion | 3.2577   | 3.57135  | 3.51965  | 0.054011 | 0.085507 | 1.179152 | 0.093776 | 0.143807 | 1.319325 |
| OID20714 | SHMT1             | Inflammat<br>ion | -2.35445 | -0.13095 | -0.6341  | 0.000273 | 0.000951 | 4.817885 | 0.002616 | 0.007453 | 3.62241  |
| OID20715 | FGF19             | Inflammat<br>ion | -1.3271  | -3.109   | -2.6289  | 3.65E-06 | 3.61E-05 | -3.31659 | 1.64E-05 | 0.000137 | -3.2578  |
| OID20716 | CD58              | Inflammat<br>ion | -2.29935 | -2.4639  | -2.3129  | 0.374532 | 0.450423 | -1.08136 | 0.960597 | 0.969426 | 1.103893 |
| OID20717 | PTPN6             | Inflammat<br>ion | -4.82805 | -4.38035 | -4.4158  | 0.232928 | 0.300182 | 1.406929 | 0.244354 | 0.317891 | 1.41539  |
| OID20718 | HSPA1A            | Inflammat<br>ion | -0.82135 | -0.3163  | -0.50595 | 0.003108 | 0.007354 | 1.36273  | 0.104182 | 0.157565 | 1.216132 |
| OID20719 | CSF1              | Inflammat<br>ion | 0.57215  | 0.8596   | 0.65585  | 0.523984 | 0.596201 | 1.140052 | 0.859968 | 0.892481 | 1.178825 |
| OID20720 | SPINT2            | Inflammat<br>ion | 4.26135  | 4.2602   | 4.44115  | 0.757847 | 0.8032   | 1.007444 | 0.619925 | 0.681359 | 1.129826 |
| OID20721 | CKMT1A_<br>CKMT1B | Inflammat<br>ion | -4.57135 | -2.77975 | -3.18025 | 0.002488 | 0.006044 | 3.473042 | 0.019069 | 0.038321 | 2.849483 |
| OID20722 | FIS1              | Inflammat<br>ion | -2.82055 | -3.19195 | -3.06365 | 0.608961 | 0.672    | -1.29025 | 0.345162 | 0.425829 | -1.34471 |
| OID20723 | SCGB3A2           | Inflammat<br>ion | -3.8009  | -4.4886  | -4.62225 | 0.0003   | 0.001032 | -1.47258 | 0.005011 | 0.012915 | -1.57549 |

|          |               |                  |          |          |          |          |          |          |          |          |          |
|----------|---------------|------------------|----------|----------|----------|----------|----------|----------|----------|----------|----------|
| OID20724 | CD40          | Inflammat<br>ion | 0.32075  | 0.4896   | 0.3983   | 0.752759 | 0.798619 | 1.027366 | 0.452273 | 0.528856 | 1.078181 |
| OID20725 | OMD           | Inflammat<br>ion | 0.77955  | 0.53835  | 0.5661   | 0.009006 | 0.018553 | -1.24225 | 0.098901 | 0.150199 | -1.06677 |
| OID20726 | ANGPTL2       | Inflammat<br>ion | -2.66165 | -4.1967  | -4.12505 | 2.05E-05 | 0.000116 | -2.84248 | 3.88E-05 | 0.00026  | -2.65461 |
| OID20727 | GAL           | Inflammat<br>ion | -5.9339  | -5.6074  | -5.36655 | 0.274093 | 0.34513  | 1.2444   | 0.131373 | 0.191564 | 1.356087 |
| OID20728 | SCG3          | Inflammat<br>ion | 3.51375  | 3.23445  | 3.73445  | 0.106316 | 0.155027 | -1.30767 | 0.800106 | 0.842297 | 1.09509  |
| OID20729 | PDLIM7        | Inflammat<br>ion | -2.12755 | -1.34335 | -1.28735 | 0.007467 | 0.015889 | 1.50906  | 0.017283 | 0.035338 | 1.66048  |
| OID20730 | SMOC2         | Inflammat<br>ion | 1.82225  | 1.28105  | 1.24845  | 4.66E-05 | 0.000216 | -1.7796  | 0.00236  | 0.006854 | -1.59698 |
| OID20731 | TREM2         | Inflammat<br>ion | 0.67075  | -1.7062  | -1.41815 | 4.9E-07  | 1.03E-05 | -4.81805 | 6.53E-06 | 7.57E-05 | -4.58461 |
| OID20732 | MZB1          | Inflammat<br>ion | -3.91975 | -4.36565 | -3.8989  | 0.575734 | 0.642435 | -1.19951 | 0.063099 | 0.102946 | 1.167725 |
| OID20733 | TNFSF13       | Inflammat<br>ion | 3.44195  | 1.5952   | 1.9535   | 2.46E-08 | 1.42E-06 | -2.96997 | 5.72E-07 | 1.7E-05  | -2.78466 |
| OID20734 | ROBO1         | Inflammat<br>ion | 1.4582   | -0.14515 | -0.0925  | 3.5E-07  | 8.17E-06 | -2.63253 | 3.12E-06 | 4.51E-05 | -2.40719 |
| OID20735 | TNFRSF11<br>B | Inflammat<br>ion | 1.8147   | 1.18975  | 1.53125  | 0.00087  | 0.002575 | -1.54002 | 0.137505 | 0.198397 | -1.26313 |
| OID20736 | ENPP5         | Inflammat<br>ion | 2.12375  | 2.58015  | 2.5162   | 0.027204 | 0.048332 | 1.36155  | 0.149291 | 0.212333 | 1.291995 |
| OID20737 | LAIR1         | Inflammat<br>ion | 2.5166   | 2.902    | 2.6849   | 0.049085 | 0.079141 | 1.188836 | 0.028274 | 0.052002 | 1.197396 |
| OID20738 | COLEC12       | Inflammat<br>ion | 2.52945  | 3.41115  | 3.45325  | 2.35E-05 | 0.000128 | 1.995223 | 4.59E-05 | 0.0003   | 2.224683 |
| OID20739 | SIRPB1        | Inflammat<br>ion | -1.0664  | -1.20855 | -0.93885 | 0.153418 | 0.212157 | -1.09889 | 0.801728 | 0.843197 | -1.06958 |

|          |        |                  |          |          |          |          |          |          |          |          |          |
|----------|--------|------------------|----------|----------|----------|----------|----------|----------|----------|----------|----------|
| OID20740 | ANGPT1 | Inflammat<br>ion | -2.32015 | -3.0096  | -2.83985 | 0.001124 | 0.00314  | -1.48437 | 0.008705 | 0.020293 | -1.40776 |
| OID20741 | PDGFB  | Inflammat<br>ion | -5.2421  | -4.62915 | -5.2267  | 0.422392 | 0.496559 | 1.570039 | 0.805813 | 0.846682 | -1.06245 |
| OID20742 | CRKL   | Inflammat<br>ion | -2.05    | -1.96635 | -2.00655 | 0.276236 | 0.346636 | -1.05343 | 0.486324 | 0.563274 | 1.030397 |
| OID20743 | EPCAM  | Inflammat<br>ion | -3.60675 | -2.73325 | -2.87805 | 0.000685 | 0.002075 | 1.850032 | 0.006639 | 0.01627  | 1.750176 |
| OID20744 | DNPH1  | Inflammat<br>ion | -3.02495 | -2.26805 | -2.42125 | 0.009471 | 0.019329 | 1.757774 | 0.039208 | 0.068334 | 1.537728 |
| OID20745 | CCL17  | Inflammat<br>ion | -4.8509  | -5.7834  | -5.5895  | 0.300342 | 0.372628 | -1.53204 | 0.786541 | 0.832005 | -1.53251 |
| OID20746 | MEGF10 | Inflammat<br>ion | 2.26645  | 0.74705  | 0.7964   | 6.44E-08 | 3.08E-06 | -2.51612 | 5.35E-08 | 3.91E-06 | -2.15995 |
| OID20747 | CRHBP  | Inflammat<br>ion | -3.84865 | -5.06    | -4.72325 | 5.84E-06 | 4.89E-05 | -2.02434 | 0.000171 | 0.000842 | -1.84114 |
| OID20748 | LGALS4 | Inflammat<br>ion | -1.72585 | -2.29145 | -1.9857  | 0.002778 | 0.00669  | -1.43968 | 0.185526 | 0.254671 | -1.24259 |
| OID20749 | LHPP   | Inflammat<br>ion | 1.44595  | 2.18145  | 2.24725  | 7.43E-06 | 5.58E-05 | 1.626138 | 0.000545 | 0.002167 | 1.413969 |
| OID20750 | TPP1   | Inflammat<br>ion | 2.9673   | 4.29665  | 4.27625  | 2.06E-06 | 2.46E-05 | 2.817177 | 6.09E-06 | 7.19E-05 | 3.114715 |
| OID20751 | CRELD2 | Inflammat<br>ion | 0.1946   | -0.48705 | -0.54625 | 0.000131 | 0.000516 | -1.51556 | 0.000224 | 0.001046 | -1.4102  |
| OID20752 | CTRC   | Inflammat<br>ion | -4.9503  | -5.98095 | -5.84    | 0.000392 | 0.001307 | -2.04068 | 0.002705 | 0.007656 | -1.63399 |
| OID20753 | MEPE   | Inflammat<br>ion | -4.2819  | -4.88765 | -4.82165 | 0.000249 | 0.00089  | -1.8264  | 0.000287 | 0.001304 | -1.72692 |
| OID20754 | CDON   | Inflammat<br>ion | 0.99665  | 0.92015  | 0.97065  | 0.489804 | 0.563737 | 1.145438 | 0.847735 | 0.881621 | 1.02406  |
| OID20755 | ADGRE2 | Inflammat<br>ion | -4.41015 | -4.4614  | -4.42405 | 0.222039 | 0.289203 | -1.12159 | 0.27403  | 0.352738 | 1.000243 |



|          |         |                  |          |          |          |          |          |          |          |          |          |
|----------|---------|------------------|----------|----------|----------|----------|----------|----------|----------|----------|----------|
| OID20756 | AGER    | Inflammat<br>ion | -2.507   | -2.8818  | -2.89745 | 0.046317 | 0.075791 | -1.15621 | 0.451344 | 0.528333 | 1.005456 |
| OID20757 | IL1R2   | Inflammat<br>ion | -3.42955 | -2.9026  | -3.20455 | 0.000292 | 0.001011 | 1.594827 | 0.210418 | 0.282443 | 1.22731  |
| OID20758 | ESM1    | Inflammat<br>ion | 2.26295  | -0.48675 | -0.27255 | 1.48E-08 | 1.16E-06 | -5.81972 | 8.72E-08 | 5.32E-06 | -4.80588 |
| OID20759 | SPON1   | Inflammat<br>ion | 3.94565  | 4.4125   | 4.40565  | 0.428111 | 0.502207 | 1.308986 | 0.343477 | 0.424226 | 1.292666 |
| OID20760 | ATP5IF1 | Inflammat<br>ion | -1.3241  | -0.94005 | -0.8822  | 0.005574 | 0.012314 | 1.652672 | 0.036813 | 0.064673 | 1.516452 |
| OID20761 | SKAP2   | Inflammat<br>ion | -4.1964  | -4.27615 | -4.42045 | 0.902198 | 0.920645 | -1.03839 | 0.896499 | 0.922034 | -1.01614 |
| OID20762 | CXCL1   | Inflammat<br>ion | 0.7878   | -0.03965 | -0.2048  | 0.005888 | 0.012802 | -1.80344 | 0.014338 | 0.03051  | -2.04202 |
| OID20763 | PRSS8   | Inflammat<br>ion | -0.90915 | -1.1232  | -0.98865 | 0.004639 | 0.010447 | -1.21159 | 0.036683 | 0.064617 | -1.13135 |
| OID20764 | PLAUR   | Inflammat<br>ion | 0.0718   | 0.05835  | 0.2959   | 0.286837 | 0.357786 | -1.02619 | 0.732158 | 0.785832 | 1.027259 |
| OID20765 | CCL22   | Inflammat<br>ion | -8.43875 | -8.68215 | -7.9745  | 0.777746 | 0.82191  | -1.1113  | 0.975215 | 0.981472 | -1.34471 |
| OID20766 | PRELP   | Inflammat<br>ion | 3.0049   | 2.29405  | 2.7959   | 0.00268  | 0.006495 | -1.52737 | 0.170648 | 0.23748  | -1.24608 |
| OID20767 | MATN2   | Inflammat<br>ion | 0.9945   | 0.15665  | 0.29315  | 6.79E-05 | 0.000297 | -1.74158 | 0.007263 | 0.017566 | -1.5042  |
| OID20768 | LTBR    | Inflammat<br>ion | -0.43485 | -0.70025 | -0.66735 | 0.028694 | 0.05041  | -1.10347 | 0.155403 | 0.219604 | -1.02211 |
| OID20769 | LAMA4   | Inflammat<br>ion | -1.2289  | -1.04735 | -0.7481  | 0.28379  | 0.355709 | -1.15261 | 0.290281 | 0.370615 | 1.196234 |
| OID20770 | FST     | Inflammat<br>ion | -2.22985 | -3.0033  | -2.8604  | 0.001424 | 0.003822 | -1.23795 | 0.00137  | 0.004412 | -1.32492 |
| OID20771 | CHRD1   | Inflammat<br>ion | 2.841    | 3.1653   | 2.99565  | 0.019    | 0.0356   | 1.275842 | 0.023337 | 0.045033 | 1.108301 |

|          |          |                  |          |          |          |          |          |          |          |          |          |
|----------|----------|------------------|----------|----------|----------|----------|----------|----------|----------|----------|----------|
| OID20772 | CCL24    | Inflammat<br>ion | -3.77495 | -4.82765 | -4.49125 | 0.000948 | 0.002753 | -1.63824 | 0.002722 | 0.007683 | -1.81623 |
| OID20773 | LGMM     | Inflammat<br>ion | 3.02685  | 2.15705  | 2.5284   | 0.050409 | 0.080684 | -1.17723 | 0.777    | 0.825093 | -1.08309 |
| OID20774 | DAG1     | Inflammat<br>ion | 1.76305  | 1.19805  | 1.526    | 5.62E-05 | 0.000253 | -1.34406 | 0.009811 | 0.022257 | -1.27766 |
| OID20775 | PNLIPRP2 | Inflammat<br>ion | -4.52355 | -5.2995  | -5.1224  | 0.064419 | 0.100454 | -1.61748 | 0.376802 | 0.456654 | -1.22086 |
| OID20776 | OSCAR    | Inflammat<br>ion | -1.86955 | -2.59635 | -2.38935 | 9.43E-05 | 0.000391 | -1.64627 | 0.020076 | 0.04008  | -1.26861 |
| OID20777 | PON3     | Inflammat<br>ion | -6.64505 | -5.96135 | -5.8916  | 0.086237 | 0.128827 | 1.225652 | 0.012385 | 0.027252 | 1.264923 |
| OID20778 | FABP1    | Inflammat<br>ion | -0.96915 | -1.45205 | -0.97255 | 0.025668 | 0.046051 | -1.62068 | 0.413091 | 0.49035  | -1.2571  |
| OID20779 | MPIG6B   | Inflammat<br>ion | -4.82645 | -4.2244  | -4.68845 | 0.090442 | 0.13456  | 1.176621 | 0.892704 | 0.92028  | 1.090054 |
| OID20780 | B4GALT1  | Inflammat<br>ion | 0.58715  | -2.04545 | -1.55585 | 1.18E-08 | 1.08E-06 | -4.74481 | 1.99E-07 | 8.18E-06 | -4.25527 |
| OID20781 | LGALS9   | Inflammat<br>ion | 0.22905  | 0.50345  | 0.4289   | 0.001217 | 0.003341 | 1.126424 | 0.00329  | 0.009032 | 1.191724 |
| OID20782 | FSTL3    | Inflammat<br>ion | 0.606    | 0.30055  | 0.07905  | 0.097558 | 0.143976 | -1.13567 | 0.030991 | 0.055967 | -1.21167 |
| OID20783 | TNFRSF14 | Inflammat<br>ion | 3.1142   | 3.1249   | 2.9764   | 0.583473 | 0.649091 | 1.052558 | 0.479943 | 0.557648 | -1.00793 |
| OID20784 | REG4     | Inflammat<br>ion | -2.32335 | -1.80585 | -1.8878  | 0.315158 | 0.386499 | 1.077098 | 0.037945 | 0.066555 | 1.279695 |
| OID20785 | WFIKKN2  | Inflammat<br>ion | 2.0899   | 1.2088   | 1.56635  | 0.010478 | 0.021226 | -1.52832 | 0.053482 | 0.089403 | -1.23119 |
| OID20786 | AGRN     | Inflammat<br>ion | 4.5325   | 3.27285  | 3.6447   | 2.02E-05 | 0.000115 | -2.0824  | 0.006694 | 0.016333 | -1.83045 |
| OID20787 | TFF2     | Inflammat<br>ion | -0.7966  | -0.53835 | -0.3188  | 0.19838  | 0.264668 | 1.139499 | 0.019091 | 0.038321 | 1.276594 |

|          |         |              |          |          |          |          |          |          |          |          |          |
|----------|---------|--------------|----------|----------|----------|----------|----------|----------|----------|----------|----------|
| OID20788 | CXCL3   | Inflammation | -3.4606  | -5.04965 | -4.46195 | 0.002857 | 0.006833 | -3.25284 | 0.100607 | 0.152577 | -1.73418 |
| OID20789 | NME3    | Inflammation | -2.7056  | -2.6618  | -2.5473  | 0.155956 | 0.215396 | -1.06014 | 0.367879 | 0.448314 | -1.02473 |
| OID20792 | NDRG1   | Neurology    | -1.318   | -0.8489  | -1.12425 | 0.003596 | 0.0084   | 1.266064 | 0.183023 | 0.252281 | 1.108378 |
| OID20793 | ODAM    | Neurology    | -1.2412  | -1.65055 | -1.69865 | 0.391959 | 0.467287 | -1.43212 | 0.195672 | 0.26547  | -1.39441 |
| OID20797 | COPE    | Neurology    | -0.77175 | -0.24605 | -0.18575 | 0.056845 | 0.089421 | 1.549551 | 0.020769 | 0.041089 | 2.308011 |
| OID20799 | SLC16A1 | Neurology    | -1.1484  | -0.43535 | -0.61965 | 0.557582 | 0.625996 | 1.394792 | 0.809727 | 0.849169 | 1.461196 |
| OID20801 | CALB2   | Neurology    | 0.8629   | 0.05475  | -0.2186  | 0.000412 | 0.001362 | -1.52124 | 9.53E-05 | 0.000515 | -2.09333 |
| OID20806 | AMFR    | Neurology    | -1.6693  | -0.8547  | -1.09005 | 0.000762 | 0.002292 | 2.073905 | 0.030516 | 0.055291 | 1.291995 |
| OID20807 | MMP13   | Neurology    | -2.574   | -1.98895 | -2.2931  | 0.071878 | 0.11038  | 1.500091 | 0.211263 | 0.283232 | 1.298009 |
| OID20808 | CDHR1   | Neurology    | 5.02495  | 3.4523   | 3.4331   | 5.32E-07 | 1.06E-05 | -2.51324 | 1.17E-06 | 2.48E-05 | -2.88146 |
| OID20809 | IL34    | Neurology    | 5.17975  | 5.30255  | 5.09385  | 0.396657 | 0.471352 | -1.13634 | 0.144473 | 0.206014 | -1.28842 |
| OID20810 | ANXA5   | Neurology    | -0.31975 | 0.1931   | -0.6564  | 0.138564 | 0.194557 | 1.37102  | 0.499458 | 0.571255 | -1.25941 |
| OID20816 | TDGF1   | Neurology    | -1.782   | -3.02435 | -2.9928  | 0.028578 | 0.050286 | -2.35487 | 0.051846 | 0.086911 | -1.74993 |
| OID20824 | LIF     | Neurology    | 4.14795  | 5.4645   | 5.7343   | 5.46E-05 | 0.000248 | 2.387995 | 3.85E-08 | 3.25E-06 | 3.335031 |
| OID20830 | MAPT    | Neurology    | 2.869    | 3.174    | 2.75615  | 0.298645 | 0.371362 | 1.176621 | 0.915186 | 0.933898 | 1.065995 |
| OID20840 | EPHA10  | Neurology    | 2.1906   | 0.5198   | 0.64305  | 2.55E-06 | 2.83E-05 | -2.611   | 9.56E-06 | 0.0001   | -2.18185 |
| OID20841 | GHRHR   | Neurology    | -1.4195  | -0.7143  | -0.9962  | 0.101951 | 0.149256 | 1.549551 | 0.143673 | 0.205141 | 1.239192 |
| OID20846 | FKBP7   | Neurology    | -0.4188  | -0.5087  | -0.39305 | 0.59013  | 0.655833 | -1.07531 | 0.370407 | 0.450396 | 1.129826 |
| OID20847 | PTS     | Neurology    | 0.72705  | 1.0137   | 1.00845  | 0.725642 | 0.777322 | 1.029433 | 0.755449 | 0.805323 | 1.252578 |
| OID20849 | NXPH1   | Neurology    | 2.7541   | 0.30695  | 0.74465  | 1.2E-09  | 2.47E-07 | -4.09922 | 4.11E-09 | 6.44E-07 | -4.53468 |
| OID20855 | ILKAP   | Neurology    | -1.17365 | -0.5555  | -0.44215 | 0.003703 | 0.008613 | 1.912885 | 0.005712 | 0.014419 | 1.584415 |
| OID20861 | GDNF    | Neurology    | -3.616   | -2.97815 | -2.21985 | 0.009902 | 0.020171 | 1.892312 | 0.003065 | 0.008521 | 2.735207 |
| OID20862 | SLIT2   | Neurology    | 2.66085  | 0.23175  | 0.5142   | 5.54E-07 | 1.09E-05 | -5.38557 | 3.82E-05 | 0.000258 | -3.99045 |
| OID20863 | NOS1    | Neurology    | -2.02095 | -2.48715 | -2.5225  | 0.192675 | 0.257682 | -1.68395 | 0.302325 | 0.383761 | -1.25937 |
| OID20866 | MUC13   | Neurology    | -4.5923  | -3.47645 | -3.6708  | 0.001337 | 0.003635 | 2.251677 | 0.003614 | 0.009798 | 2.008544 |
| OID20871 | NEFL    | Neurology    | 0.24245  | 0.515    | -0.5245  | 0.59946  | 0.663516 | -1.17707 | 0.076088 | 0.120036 | -1.89842 |
| OID20872 | FHIT    | Neurology    | -1.2801  | -1.24845 | -0.6229  | 0.185487 | 0.249895 | 1.152327 | 0.1841   | 0.25331  | 1.526471 |

|          |              |           |          |          |          |          |          |          |          |          |          |
|----------|--------------|-----------|----------|----------|----------|----------|----------|----------|----------|----------|----------|
| OID20873 | KIRREL2      | Neurology | 1.35775  | -0.09285 | 0.0769   | 2.11E-05 | 0.000118 | -2.48045 | 0.000117 | 0.000602 | -2.37528 |
| OID20874 | CLSTN1       | Neurology | 0.71895  | 2.2011   | 2.025    | 3.74E-05 | 0.000182 | 2.788714 | 2.75E-05 | 0.000203 | 2.654058 |
| OID20876 | GSTP1        | Neurology | 0.3658   | 1.5496   | 0.8951   | 0.000371 | 0.001247 | 2.438595 | 0.022166 | 0.043254 | 1.613004 |
| OID20877 | MAX          | Neurology | -1.10005 | -0.3301  | -0.6158  | 0.033018 | 0.056646 | 1.603751 | 0.080776 | 0.126522 | 1.193418 |
| OID20880 | PTK7         | Neurology | 0.41365  | -0.50185 | -0.33275 | 0.001081 | 0.003066 | -1.44358 | 0.001027 | 0.003491 | -2.03962 |
| OID20889 | ISLR2        | Neurology | -0.3371  | -1.62895 | -1.72565 | 2.59E-05 | 0.000139 | -2.43058 | 0.00106  | 0.003547 | -1.90752 |
| OID20891 | ECE1         | Neurology | -2.44055 | -2.5139  | -2.11865 | 0.875396 | 0.899986 | -1.05493 | 0.214657 | 0.286731 | -1.06201 |
| OID20895 | AKT1S1       | Neurology | -2.597   | -2.456   | -2.6239  | 0.120711 | 0.172579 | 1.019492 | 0.487355 | 0.563873 | -1.10194 |
| OID20897 | DPEP1        | Neurology | -5.93105 | -5.5146  | -5.55085 | 0.02013  | 0.03759  | 1.714158 | 0.024091 | 0.046083 | 1.94174  |
| OID20900 | IL18RAP      | Neurology | -7.8752  | -7.07245 | -6.2581  | 0.008768 | 0.018233 | 1.928461 | 0.007638 | 0.018193 | 2.765902 |
| OID20901 | CRIP2        | Neurology | -4.4805  | -3.1433  | -3.70025 | 0.000903 | 0.002665 | 1.587658 | 0.013873 | 0.029635 | 1.302425 |
| OID20902 | PPP3R1       | Neurology | -2.0973  | -1.93655 | -2.28995 | 0.842919 | 0.874684 | -1.06319 | 0.651046 | 0.710585 | -1.17153 |
| OID20903 | DARS1        | Neurology | -2.68565 | -2.1607  | -2.38255 | 0.264504 | 0.335752 | 1.493451 | 0.750742 | 0.801863 | 1.33256  |
| OID20904 | MAD1L1       | Neurology | -3.39275 | -2.6656  | -2.84745 | 0.001412 | 0.003801 | 1.57538  | 0.025521 | 0.048033 | 1.422669 |
| OID20906 | SKAP1        | Neurology | -5.4609  | -4.07545 | -4.24805 | 0.016459 | 0.031375 | 2.397698 | 0.078415 | 0.123175 | 1.78912  |
| OID20909 | GGT5         | Neurology | -5.40185 | -4.90615 | -4.7406  | 0.64635  | 0.708276 | -1.03462 | 0.096241 | 0.146768 | 1.291636 |
| OID20910 | CLPP         | Neurology | -1.6946  | -0.66565 | -0.49335 | 0.000646 | 0.001999 | 2.325595 | 0.001805 | 0.005519 | 2.532391 |
| OID20911 | IL6          | Neurology | -0.15095 | 0.24515  | 0.58915  | 0.365829 | 0.440439 | 1.189372 | 0.070571 | 0.112464 | 1.318274 |
| OID20912 | PTPRN2       | Neurology | 2.30355  | 1.77815  | 1.76235  | 3E-05    | 0.000152 | -1.32777 | 4.71E-05 | 0.000303 | -1.39508 |
| OID20913 | NMNAT1       | Neurology | -0.9151  | -0.80455 | -0.7306  | 0.961942 | 0.967228 | 1.002012 | 0.923058 | 0.941056 | 1.042321 |
| OID20915 | CSF2RA       | Neurology | -2.21255 | -2.6693  | -2.4739  | 0.023563 | 0.042553 | -1.20752 | 0.395756 | 0.474522 | -1.16239 |
| OID20916 | PSG1         | Neurology | -4.10165 | -3.1411  | -3.1061  | 0.000186 | 0.000694 | 1.520136 | 2.63E-05 | 0.000196 | 1.655653 |
| OID20917 | DRAXIN       | Neurology | -0.6729  | -2.77095 | -2.68245 | 7.92E-06 | 5.72E-05 | -3.75341 | 1.69E-05 | 0.000141 | -3.81676 |
| OID20918 | EBAG9        | Neurology | -3.5369  | -2.8317  | -2.90395 | 0.011491 | 0.023151 | 1.400459 | 0.036722 | 0.064617 | 2.057083 |
| OID20919 | ULBP2        | Neurology | -0.1135  | -0.2461  | 0.00625  | 0.210292 | 0.277525 | -1.06884 | 0.997143 | 0.998161 | 1.016598 |
| OID20921 | ABHD14B      | Neurology | -3.7946  | -3.12785 | -3.2287  | 0.001629 | 0.00427  | 1.587493 | 0.003491 | 0.009512 | 1.505142 |
| OID20922 | PHOSPHO<br>1 | Neurology | -3.1549  | -3.06115 | -3.1299  | 0.725006 | 0.777322 | 1.070437 | 0.594058 | 0.658864 | 1.105884 |
| OID20923 | CRADD        | Neurology | -5.0573  | -4.3966  | -5.59995 | 0.108472 | 0.157961 | 1.427806 | 0.821489 | 0.859862 | -1.06847 |

|          |          |           |          |          |          |          |          |          |          |          |          |
|----------|----------|-----------|----------|----------|----------|----------|----------|----------|----------|----------|----------|
| OID20924 | SPOCK1   | Neurology | 5.27125  | 6.05975  | 5.87245  | 0.000202 | 0.000739 | 1.544243 | 0.000224 | 0.001046 | 1.454981 |
| OID20926 | WWP2     | Neurology | -4.65965 | -4.0528  | -3.95165 | 0.069696 | 0.10733  | 1.286053 | 0.057867 | 0.096125 | 1.500663 |
| OID20927 | APRT     | Neurology | -5.20815 | -3.81365 | -4.4396  | 0.009161 | 0.018837 | 2.559656 | 0.085825 | 0.134048 | 1.590687 |
| OID20931 | NAAA     | Neurology | 0.1826   | -2.14835 | -1.5515  | 5.7E-06  | 4.85E-05 | -3.36814 | 5.46E-05 | 0.000337 | -3.26278 |
| OID20932 | SERPINB9 | Neurology | -0.46115 | -0.19405 | -0.01505 | 0.032016 | 0.055186 | 1.215584 | 0.007493 | 0.017925 | 1.446333 |
| OID20933 | GFRA3    | Neurology | -3.8672  | -4.54805 | -4.4389  | 0.00026  | 0.00092  | -1.42306 | 0.010381 | 0.023348 | -1.57037 |
| OID20934 | DKK4     | Neurology | -0.02165 | 0.01615  | 0.1124   | 0.859363 | 0.886824 | 1.162596 | 0.312599 | 0.394976 | -1.00125 |
| OID20935 | EFNA4    | Neurology | -0.03335 | -1.7292  | -1.3796  | 1.41E-05 | 8.86E-05 | -2.88526 | 0.000183 | 0.000886 | -2.44765 |
| OID20936 | VWC2     | Neurology | 0.5452   | -1.86955 | -1.73785 | 9.84E-07 | 1.45E-05 | -4.20425 | 4.5E-07  | 1.45E-05 | -4.57335 |
| OID20937 | FKBP5    | Neurology | -3.4194  | -2.39275 | -2.5036  | 3.52E-05 | 0.000172 | 1.985772 | 0.000297 | 0.00134  | 1.873908 |
| OID20938 | RSPO1    | Neurology | 1.0112   | 0.02375  | 0.1323   | 3.83E-05 | 0.000184 | -2.07247 | 2.5E-05  | 0.000189 | -1.8214  |
| OID20939 | WFIKKN1  | Neurology | -4.96305 | -5.60715 | -5.25275 | 0.047521 | 0.077301 | -1.48854 | 0.036657 | 0.064617 | -1.57009 |
| OID20940 | CDCP1    | Neurology | -0.8785  | -0.6725  | -0.6979  | 0.132301 | 0.186479 | 1.142782 | 0.088889 | 0.138048 | 1.132962 |
| OID20941 | IFNGR2   | Neurology | -1.16875 | -1.3983  | -1.33685 | 0.294206 | 0.366257 | -1.12471 | 0.227718 | 0.30161  | -1.04265 |
| OID20943 | SCARB2   | Neurology | 0.1936   | -1.03335 | -0.9756  | 9.94E-08 | 4.37E-06 | -2.22677 | 1.61E-07 | 7.38E-06 | -2.42477 |
| OID20944 | GPC5     | Neurology | 0.89535  | -0.52745 | -0.3208  | 1.5E-07  | 5.14E-06 | -2.6899  | 1.43E-06 | 2.71E-05 | -2.73938 |
| OID20945 | LY96     | Neurology | -4.44565 | -4.47495 | -4.41845 | 0.269932 | 0.341288 | 1.033508 | 0.387489 | 0.466517 | 1.098702 |
| OID20946 | FLRT2    | Neurology | -2.7984  | -3.0189  | -2.7807  | 0.039644 | 0.066073 | -1.19036 | 0.611893 | 0.674557 | -1.07427 |
| OID20947 | TMPRSS5  | Neurology | 0.38835  | -0.25125 | -0.2808  | 5.12E-05 | 0.000235 | -1.56884 | 0.000217 | 0.001025 | -1.38939 |
| OID20948 | SETMAR   | Neurology | -5.60225 | -5.05065 | -5.08375 | 0.029741 | 0.051891 | 1.285964 | 0.325498 | 0.40964  | 1.328778 |
| OID20949 | GLB1     | Neurology | 0.7992   | 0.2771   | 0.29455  | 0.004107 | 0.009453 | -1.44328 | 0.003447 | 0.009415 | -1.46586 |
| OID20950 | RHOC     | Neurology | -4.1319  | -3.78135 | -3.66905 | 0.116529 | 0.167691 | 1.253403 | 0.044896 | 0.076905 | 1.311666 |
| OID20951 | MDGA1    | Neurology | 2.53625  | 1.10345  | 1.14665  | 3.94E-06 | 3.8E-05  | -2.83049 | 1.05E-05 | 0.000105 | -2.72915 |
| OID20952 | TXLNA    | Neurology | -3.07605 | -2.8802  | -3.13715 | 0.774238 | 0.818992 | -1.17789 | 0.94494  | 0.956262 | -1.0284  |
| OID20953 | TNFSF14  | Neurology | -5.67865 | -4.78665 | -5.36385 | 0.000596 | 0.001866 | 2.352427 | 0.007474 | 0.017925 | 1.543922 |
| OID20955 | STAMBP   | Neurology | -4.89375 | -4.43555 | -4.40075 | 0.004446 | 0.010107 | 1.373827 | 0.034016 | 0.060632 | 1.442329 |
| OID20956 | DNMBP    | Neurology | -3.70645 | -3.13165 | -3.22975 | 9.31E-05 | 0.000387 | 1.450198 | 0.000725 | 0.002627 | 1.359051 |
| OID20957 | TNR      | Neurology | 3.6787   | 4.22395  | 4.10465  | 0.028187 | 0.04985  | 1.302741 | 0.026941 | 0.050053 | 1.284093 |
| OID20958 | CC2D1A   | Neurology | -3.05645 | -2.56045 | -2.79205 | 0.004516 | 0.010225 | 1.303012 | 0.090357 | 0.139876 | 1.254489 |

|          |               |           |          |          |          |          |          |          |          |          |          |
|----------|---------------|-----------|----------|----------|----------|----------|----------|----------|----------|----------|----------|
| OID20959 | MITD1         | Neurology | -4.07995 | -2.64585 | -3.31925 | 7.18E-06 | 5.47E-05 | 2.500905 | 0.010398 | 0.023348 | 1.627209 |
| OID20960 | FKBP4         | Neurology | -3.4451  | -3.20285 | -3.2106  | 0.048863 | 0.079015 | 1.144645 | 0.020886 | 0.041246 | 1.219509 |
| OID20961 | NPM1          | Neurology | -2.20415 | -1.07025 | -1.36775 | 0.005434 | 0.012032 | 1.971304 | 0.038125 | 0.066765 | 2.253082 |
| OID20962 | PRDX1         | Neurology | 1.06825  | 2.0415   | 2.04965  | 6.28E-05 | 0.00028  | 1.854782 | 0.000799 | 0.002849 | 1.689856 |
| OID20963 | LPO           | Neurology | -3.8529  | -4.53555 | -4.48765 | 0.844413 | 0.874684 | -1.71642 | 0.749734 | 0.801566 | 1.010241 |
| OID20964 | TNFRSF6B      | Neurology | -2.9825  | -4.77675 | -3.80345 | 0.004387 | 0.009993 | -2.42469 | 0.090602 | 0.139904 | -3.06556 |
| OID20965 | LAIR2         | Neurology | -3.21805 | -3.4405  | -3.42475 | 0.387157 | 0.46307  | 1.200429 | 0.284139 | 0.364469 | 1.188795 |
| OID20966 | CD274         | Neurology | -1.4888  | -1.8502  | -1.92665 | 0.005737 | 0.012584 | -1.20506 | 0.065359 | 0.106003 | -1.18267 |
| OID20967 | TNFRSF10<br>A | Neurology | -2.8504  | -2.30125 | -2.3012  | 0.001124 | 0.00314  | 1.21934  | 0.00044  | 0.00181  | 1.4799   |
| OID20968 | FRZB          | Neurology | 0.0495   | 0.12445  | 0.3244   | 0.968232 | 0.971772 | 1.035301 | 0.847898 | 0.881621 | 1.142386 |
| OID20969 | PSME1         | Neurology | -4.2402  | -3.6572  | -3.71825 | 0.012855 | 0.025664 | 1.395469 | 0.029712 | 0.054282 | 1.338855 |
| OID20970 | LAYN          | Neurology | 2.1421   | 1.8541   | 1.7526   | 0.847748 | 0.877311 | 1.0475   | 0.701196 | 0.756299 | -1.10581 |
| OID20971 | SNCG          | Neurology | -2.0454  | -2.2233  | -2.21895 | 0.147043 | 0.20463  | -1.05205 | 0.251105 | 0.325902 | -1.17259 |
| OID20973 | CCS           | Neurology | -4.7676  | -4.2597  | -4.5454  | 0.013746 | 0.026953 | 1.421979 | 0.242205 | 0.315469 | 1.166511 |
| OID20974 | ADGRB3        | Neurology | -0.4112  | -1.12065 | -1.3188  | 8.95E-07 | 1.35E-05 | -1.38319 | 2.01E-07 | 8.18E-06 | -1.48519 |
| OID20975 | HNMT          | Neurology | -4.08215 | -5.5563  | -5.4383  | 0.002788 | 0.006699 | -2.20083 | 0.003655 | 0.009885 | -2.06194 |
| OID20976 | CX3CL1        | Neurology | -3.5282  | -3.5549  | -3.8368  | 0.829185 | 0.8638   | -1.02073 | 0.664962 | 0.725053 | -1.13171 |
| OID20978 | AFP           | Neurology | -6.9247  | -6.06135 | -6.35    | 0.02085  | 0.038606 | 1.758749 | 0.119651 | 0.178018 | 1.39944  |
| OID20979 | MATN3         | Neurology | -1.8429  | -2.76235 | -2.7607  | 0.048046 | 0.078039 | -1.65893 | 0.039061 | 0.068185 | -1.36495 |
| OID20980 | OBP2B         | Neurology | -1.36535 | -1.90095 | -1.91265 | 6.31E-05 | 0.00028  | -1.44033 | 2.09E-05 | 0.000167 | -1.7483  |
| OID20981 | TNFRSF10<br>B | Neurology | -1.12925 | -1.0757  | -1.0641  | 0.012246 | 0.024627 | 1.309395 | 0.030346 | 0.055166 | 1.264792 |
| OID20982 | EPHB6         | Neurology | -0.96435 | -2.6837  | -2.791   | 2.8E-07  | 7.16E-06 | -3.57031 | 1.05E-06 | 2.38E-05 | -3.36778 |
| OID20983 | CALCA         | Neurology | -3.63115 | -3.88575 | -4.0288  | 0.085251 | 0.128175 | -1.30351 | 0.012265 | 0.027096 | -1.4289  |
| OID20984 | SFRP1         | Neurology | 4.1552   | 1.5413   | 1.9412   | 2.05E-06 | 2.46E-05 | -5.43489 | 0.000125 | 0.000633 | -3.06227 |
| OID20985 | TNFRSF9       | Neurology | -3.5754  | -2.73065 | -2.68805 | 0.008867 | 0.018391 | 1.533417 | 0.000682 | 0.002529 | 1.752665 |
| OID20986 | RBKS          | Neurology | -0.6247  | -0.3104  | -0.45515 | 0.336857 | 0.409147 | 1.144248 | 0.55299  | 0.622752 | 1.134377 |
| OID20988 | CD63          | Neurology | -3.78065 | -4.0863  | -4.5287  | 0.005024 | 0.011235 | -1.29016 | 4.4E-06  | 5.58E-05 | -1.82267 |

|          |           |           |          |          |          |          |          |          |          |          |          |
|----------|-----------|-----------|----------|----------|----------|----------|----------|----------|----------|----------|----------|
| OID20989 | PSME2     | Neurology | -4.35415 | -3.7289  | -3.50825 | 0.004357 | 0.009946 | 2.000901 | 0.003378 | 0.009248 | 1.643931 |
| OID20990 | ASGR1     | Neurology | -5.1694  | -4.59805 | -4.60305 | 0.016075 | 0.030803 | 1.640289 | 0.007159 | 0.017352 | 1.481851 |
| OID20992 | FUT8      | Neurology | -3.2097  | -4.17805 | -4.11175 | 0.000797 | 0.00239  | -1.75747 | 0.000575 | 0.002265 | -1.9445  |
| OID20994 | BMP4      | Neurology | -5.2224  | -5.24355 | -5.13005 | 0.307861 | 0.380324 | -1.18715 | 0.792017 | 0.835383 | 1.105118 |
| OID20995 | CST5      | Neurology | -1.13295 | -1.34935 | -1.19155 | 0.433153 | 0.506081 | -1.01491 | 0.298211 | 0.379262 | -1.07814 |
| OID20996 | ASAH2     | Neurology | -1.0442  | -3.2211  | -2.5941  | 4E-06    | 3.8E-05  | -2.83825 | 5.3E-06  | 6.54E-05 | -3.35753 |
| OID20997 | CXCL8     | Neurology | -0.02325 | 0.38015  | 0.50545  | 0.062724 | 0.098106 | 1.187107 | 0.024013 | 0.046015 | 1.121671 |
| OID20998 | BCAN      | Neurology | 1.8278   | 1.4782   | 1.2413   | 0.006037 | 0.013074 | -1.26484 | 0.004175 | 0.01102  | -1.25959 |
| OID20999 | ACVRL1    | Neurology | -3.5669  | -3.2006  | -3.1648  | 0.066073 | 0.102469 | 1.16538  | 0.022369 | 0.043548 | 1.129043 |
| OID21001 | ADAM22    | Neurology | 2.0141   | 0.96725  | 0.8021   | 6.51E-06 | 5.14E-05 | -2.06229 | 3.16E-06 | 4.51E-05 | -2.21039 |
| OID21004 | CCL2      | Neurology | 1.04685  | 1.7064   | 1.79585  | 0.038069 | 0.063719 | 1.219128 | 0.000692 | 0.00255  | 1.819069 |
| OID21005 | CDH15     | Neurology | -2.75645 | -3.11735 | -2.667   | 0.002408 | 0.005863 | -1.51819 | 0.252068 | 0.326766 | -1.13379 |
| OID21006 | CNTN5     | Neurology | 1.86275  | 0.93815  | 0.972    | 1.1E-07  | 4.46E-06 | -1.94524 | 1.39E-07 | 6.98E-06 | -1.82273 |
| OID21007 | ROBO2     | Neurology | 1.7695   | 0.53425  | 0.72945  | 2.66E-06 | 2.86E-05 | -2.10577 | 1.11E-05 | 0.00011  | -2.09732 |
| OID21008 | CDH3      | Neurology | 1.9649   | 1.20925  | 1.1319   | 1.13E-05 | 7.4E-05  | -1.58112 | 1.22E-06 | 2.48E-05 | -1.66077 |
| OID21009 | DDR1      | Neurology | 2.4806   | 2.58705  | 2.61215  | 0.27141  | 0.342538 | 1.163483 | 0.293794 | 0.374229 | 1.163685 |
| OID21010 | CD300C    | Neurology | -0.7302  | -0.7854  | -0.96885 | 0.210967 | 0.278081 | -1.16955 | 0.861455 | 0.89318  | -1.04138 |
| OID21011 | PVR       | Neurology | -0.3353  | -1.74415 | -1.6147  | 1.65E-08 | 1.17E-06 | -2.45879 | 2.46E-08 | 3.01E-06 | -2.20473 |
| OID21012 | TXNDC5    | Neurology | 0.11755  | -0.23725 | -0.16875 | 0.067571 | 0.104644 | -1.17911 | 0.110869 | 0.166904 | -1.25946 |
| OID21013 | FUT3_FUT5 | Neurology | 4.04945  | 4.12705  | 4.6054   | 0.252165 | 0.322326 | 1.305453 | 0.015771 | 0.032725 | 1.369928 |
| OID21014 | STC1      | Neurology | 2.421    | 0.25065  | 0.75095  | 0.052792 | 0.084131 | -1.94895 | 0.442742 | 0.519926 | -1.84395 |
| OID21015 | RWDD1     | Neurology | -0.15715 | -0.04215 | -0.07805 | 0.308973 | 0.381183 | 1.105922 | 0.178737 | 0.246859 | 1.120467 |
| OID21016 | VTA1      | Neurology | -4.59425 | -3.7128  | -3.96945 | 0.0019   | 0.004864 | 1.515664 | 0.023487 | 0.045244 | 1.45902  |
| OID21017 | EZR       | Neurology | -0.87515 | 0.56455  | 0.18655  | 3E-07    | 7.49E-06 | 2.45105  | 1.27E-05 | 0.000119 | 2.071822 |
| OID21018 | CD8A      | Neurology | -6.9647  | -6.38325 | -5.8791  | 0.034551 | 0.059092 | 1.494228 | 0.0137   | 0.029463 | 2.301062 |
| OID21019 | MMP8      | Neurology | -4.26595 | -3.93255 | -3.80875 | 0.000596 | 0.001866 | 1.588428 | 0.00581  | 0.014597 | 1.533151 |
| OID21020 | SEMA4D    | Neurology | -0.13735 | -0.622   | -0.62255 | 0.002348 | 0.005767 | -1.2588  | 0.001251 | 0.00409  | -1.29424 |
| OID21021 | PDCD5     | Neurology | -2.22535 | -2.44955 | -2.6404  | 0.228154 | 0.295069 | -1.17475 | 0.882781 | 0.911847 | -1.1765  |

|          |          |           |          |          |          |          |          |          |          |          |          |
|----------|----------|-----------|----------|----------|----------|----------|----------|----------|----------|----------|----------|
| OID21022 | NSFL1C   | Neurology | -0.83945 | -0.50355 | -0.6516  | 0.005597 | 0.01234  | 1.294594 | 0.116655 | 0.174032 | 1.085831 |
| OID21023 | SERPINB6 | Neurology | 3.0121   | 2.99915  | 3.12415  | 0.263294 | 0.334603 | 1.111764 | 0.114133 | 0.171199 | 1.212429 |
| OID21024 | CXCL13   | Neurology | -4.2618  | -5.223   | -5.13985 | 0.330839 | 0.402283 | -1.82576 | 0.494377 | 0.567216 | -2.09333 |
| OID21025 | CD34     | Neurology | -5.4629  | -5.3437  | -4.98795 | 0.206889 | 0.274353 | 1.378071 | 0.231299 | 0.305615 | 1.368741 |
| OID21026 | VCAN     | Neurology | 0.7032   | 1.0537   | 0.71315  | 0.44997  | 0.523932 | 1.200346 | 0.943142 | 0.955323 | 1.011362 |
| OID21027 | PPCDC    | Neurology | -1.96405 | -1.96485 | -2.15745 | 0.398079 | 0.472021 | 1.110416 | 0.902929 | 0.924828 | -1.14457 |
| OID21028 | SMPD1    | Neurology | 2.30465  | 0.8966   | 1.22725  | 1.73E-05 | 0.000101 | -1.95511 | 0.001663 | 0.005172 | -1.92532 |
| OID21029 | BST2     | Neurology | -2.67445 | -2.34365 | -2.34235 | 0.909622 | 0.925813 | -1.09555 | 0.633106 | 0.694455 | 1.013327 |
| OID21030 | CCL19    | Neurology | -5.92305 | -6.9964  | -6.4075  | 0.037452 | 0.062974 | -3.1341  | 0.238666 | 0.311599 | -2.54788 |
| OID21031 | SULT1A1  | Neurology | -3.54015 | -3.12545 | -3.29935 | 0.983579 | 0.984998 | -1.12097 | 0.61679  | 0.679038 | -1.27606 |
| OID21032 | SUMF2    | Neurology | 2.7002   | 3.22815  | 3.0335   | 0.001712 | 0.004433 | 1.46871  | 0.007484 | 0.017925 | 1.330621 |
| OID21033 | PRL      | Neurology | -4.423   | -4.89705 | -4.29715 | 0.002399 | 0.005853 | -1.54034 | 0.690954 | 0.748193 | -1.06925 |
| OID21034 | LBR      | Neurology | -1.6785  | -0.82075 | -0.9272  | 0.002398 | 0.005853 | 1.772456 | 0.019671 | 0.039413 | 1.376591 |
| OID21035 | LAMP2    | Neurology | 0.5902   | 0.7627   | 0.7967   | 0.901556 | 0.920645 | 1.020977 | 0.445598 | 0.52272  | 1.148937 |
| OID21036 | ANXA3    | Neurology | -6.2941  | -4.6269  | -5.03195 | 5.23E-05 | 0.000239 | 3.205835 | 0.000578 | 0.002266 | 2.322534 |
| OID21037 | ENO1     | Neurology | -0.10895 | 1.54115  | 1.10505  | 6.36E-05 | 0.000281 | 2.846226 | 0.000141 | 0.000708 | 2.348029 |
| OID21038 | CHGB     | Neurology | 4.6656   | 5.14525  | 5.12775  | 6E-06    | 4.92E-05 | 1.70734  | 1.34E-05 | 0.000123 | 1.753576 |
| OID21039 | ADAM8    | Neurology | -2.69115 | -2.4268  | -2.3979  | 0.738474 | 0.787228 | 1.017021 | 0.157766 | 0.221235 | 1.105577 |
| OID21040 | CD74     | Neurology | 0.4341   | 0.2067   | 0.47985  | 0.879601 | 0.903463 | -1.15053 | 0.015192 | 0.031773 | 1.193336 |
| OID21041 | LGALS8   | Neurology | 0.4047   | 0.9501   | 0.78205  | 0.000126 | 0.000502 | 1.472584 | 0.001325 | 0.004291 | 1.368315 |
| OID21042 | CXCL11   | Neurology | -4.5138  | -4.55415 | -4.9692  | 0.217691 | 0.285232 | -1.02836 | 0.408835 | 0.48635  | -1.14461 |
| OID21043 | FABP5    | Neurology | -1.06435 | 0.74315  | 1.22325  | 0.0079   | 0.016682 | 2.401357 | 0.005321 | 0.01365  | 2.420324 |
| OID21044 | GOLM2    | Neurology | 0.10445  | -1.26585 | -0.9505  | 1.18E-07 | 4.46E-06 | -2.64313 | 1.08E-06 | 2.38E-05 | -2.05951 |
| OID21045 | RGMB     | Neurology | 2.09405  | 0.26055  | 0.436    | 1.8E-07  | 5.23E-06 | -3.37889 | 5.54E-06 | 6.68E-05 | -2.88966 |
| OID21046 | ENO2     | Neurology | 4.0769   | 4.42055  | 4.4929   | 0.006695 | 0.014413 | 1.271693 | 0.002306 | 0.006735 | 1.433359 |
| OID21047 | OXT      | Neurology | -1.1299  | -1.60115 | -1.2527  | 0.349735 | 0.422452 | -1.17601 | 0.541795 | 0.613289 | 1.162072 |
| OID21048 | SCARF2   | Neurology | -1.95305 | -1.52655 | -1.4098  | 0.000408 | 0.001354 | 1.301207 | 0.000113 | 0.000591 | 1.379313 |
| OID21049 | TNFRSF8  | Neurology | -3.70995 | -3.6974  | -3.7694  | 0.649161 | 0.709939 | 1.064592 | 0.797571 | 0.840434 | 1.0511   |
| OID21050 | THY1     | Neurology | 2.6497   | 2.69185  | 2.7325   | 0.480737 | 0.555047 | 1.034583 | 0.497903 | 0.570666 | 1.110031 |



|          |          |           |          |          |          |          |          |          |          |          |          |
|----------|----------|-----------|----------|----------|----------|----------|----------|----------|----------|----------|----------|
| OID21051 | BST1     | Neurology | -3.0593  | -2.75425 | -2.65165 | 0.01676  | 0.031838 | 1.235975 | 0.001056 | 0.003545 | 1.348916 |
| OID21052 | TNFRSF21 | Neurology | 1.2686   | 0.5103   | 0.3958   | 8.23E-07 | 1.29E-05 | -1.56303 | 9.54E-07 | 2.31E-05 | -1.41962 |
| OID21053 | CPPED1   | Neurology | -0.95475 | 0.66505  | 0.1741   | 0.000916 | 0.002697 | 3.073324 | 0.010304 | 0.023231 | 2.712833 |
| OID21054 | CPM      | Neurology | 0.5352   | 0.40905  | 0.27005  | 0.071996 | 0.110407 | -1.12459 | 0.03427  | 0.060986 | -1.09897 |
| OID21055 | NCAN     | Neurology | 2.9275   | 4.0488   | 3.97635  | 0.00228  | 0.005638 | 2.101836 | 0.000393 | 0.001658 | 2.334559 |
| OID21056 | CTSS     | Neurology | 0.3024   | 0.4112   | 0.6186   | 0.10085  | 0.148039 | 1.022535 | 0.002169 | 0.006367 | 1.266371 |
| OID21057 | NTRK3    | Neurology | -0.1054  | -0.96595 | -0.96185 | 8.06E-06 | 5.75E-05 | -1.47565 | 1.22E-06 | 2.48E-05 | -1.56765 |
| OID21058 | SCARA5   | Neurology | -3.26845 | -3.116   | -2.98895 | 0.984101 | 0.984998 | 1.077024 | 0.07312  | 0.11602  | 1.255098 |
| OID21059 | LRPAP1   | Neurology | 1.63565  | 1.14975  | 1.2092   | 0.008409 | 0.017653 | -1.37316 | 0.046907 | 0.079605 | -1.37869 |
| OID21060 | CPA2     | Neurology | -0.57835 | -0.847   | -0.90775 | 0.008438 | 0.017681 | -1.19222 | 0.00242  | 0.007012 | -1.32588 |
| OID21061 | CLEC1B   | Neurology | -4.3263  | -4.34735 | -4.101   | 0.807983 | 0.84734  | -1.09699 | 0.978404 | 0.98378  | 1.128182 |
| OID21062 | FOLR2    | Neurology | -0.9449  | -0.96305 | -0.1725  | 0.118044 | 0.169428 | 1.053215 | 0.000808 | 0.002852 | 1.667631 |
| OID21063 | MSR1     | Neurology | -0.00865 | -0.62885 | -0.9052  | 1.17E-05 | 7.65E-05 | -1.77571 | 0.000166 | 0.00082  | -1.57975 |
| OID21064 | JAM2     | Neurology | 4.5153   | 4.18945  | 4.1703   | 0.012918 | 0.025695 | -1.22999 | 0.013704 | 0.029463 | -1.0949  |
| OID21065 | RGMA     | Neurology | -0.4528  | -1.9173  | -1.61415 | 7.29E-07 | 1.27E-05 | -2.8297  | 3.03E-05 | 0.000217 | -2.18079 |
| OID21066 | DKK1     | Neurology | 0.8707   | 0.6271   | 0.54035  | 0.861002 | 0.887681 | -1.02968 | 0.153542 | 0.217535 | -1.75443 |
| OID21067 | BIN2     | Neurology | -1.8662  | -0.89225 | -1.4866  | 0.000126 | 0.000502 | 2.256442 | 0.015297 | 0.03187  | 1.372922 |
| OID21068 | CCN5     | Neurology | 0.9083   | -0.31355 | -0.0146  | 2.9E-05  | 0.000149 | -1.9668  | 0.000667 | 0.002491 | -1.98412 |
| OID21069 | CGA      | Neurology | 1.14785  | 0.89095  | 1.01865  | 0.964992 | 0.969407 | -1.04801 | 0.151524 | 0.214952 | 1.03976  |
| OID21070 | APP      | Neurology | 6.36165  | 7.43995  | 7.54365  | 5.81E-06 | 4.89E-05 | 1.98364  | 1.82E-06 | 3.21E-05 | 2.013981 |
| OID21071 | ITGAM    | Neurology | 0.06265  | 0.3397   | 0.07285  | 0.014189 | 0.027574 | 1.175521 | 0.561688 | 0.631253 | -1.09863 |
| OID21072 | APOH     | Neurology | 1.9318   | 2.32965  | 2.3097   | 0.937955 | 0.948319 | -1.05052 | 0.752786 | 0.803264 | 1.148141 |
| OID21073 | MIF      | Neurology | 4.91065  | 5.8846   | 5.8256   | 2.83E-08 | 1.52E-06 | 2.163849 | 1.5E-07  | 7.18E-06 | 2.080312 |
| OID21074 | NPTX1    | Neurology | 5.459    | 4.63615  | 4.67175  | 0.0002   | 0.000736 | -1.79061 | 0.001111 | 0.003674 | -1.59654 |
| OID21075 | GGT1     | Neurology | 0.892    | 0.8046   | 0.8454   | 0.814785 | 0.852032 | -1.05588 | 0.592287 | 0.6576   | -1.03283 |
| OID21076 | BCAM     | Neurology | 4.20585  | 4.1972   | 4.1587   | 0.487741 | 0.56229  | 1.046629 | 0.473458 | 0.55128  | 1.091188 |
| OID21077 | STIP1    | Neurology | 0.1226   | 0.57465  | 0.48555  | 0.082968 | 0.125136 | 1.28187  | 0.237666 | 0.311407 | 1.237776 |
| OID21078 | AHSP     | Neurology | -1.8156  | -1.55855 | -1.90255 | 0.20745  | 0.274434 | -1.15221 | 0.641527 | 0.70229  | -1.17952 |
| OID21079 | DSC2     | Neurology | 3.7782   | 3.83365  | 3.83395  | 0.520433 | 0.592775 | 1.025907 | 0.498832 | 0.571134 | 1.130883 |

|          |          |           |          |          |          |          |          |          |          |          |          |
|----------|----------|-----------|----------|----------|----------|----------|----------|----------|----------|----------|----------|
| OID21080 | CD164    | Neurology | 7.32675  | 8.2426   | 8.31725  | 6.67E-06 | 5.19E-05 | 2.089996 | 3.54E-05 | 0.000246 | 2.291989 |
| OID21081 | NRP2     | Neurology | 1.83155  | 0.4068   | 0.6398   | 3.01E-05 | 0.000153 | -2.28105 | 0.000321 | 0.001393 | -2.18192 |
| OID21082 | SIGLEC5  | Neurology | 2.24035  | 1.46395  | 1.83885  | 0.012618 | 0.025328 | -1.45433 | 0.08671  | 0.135046 | -1.47264 |
| OID21083 | MMP3     | Neurology | 2.03895  | 4.0783   | 2.47995  | 0.005941 | 0.012893 | 3.914288 | 0.231755 | 0.305849 | 1.310757 |
| OID21084 | WARS     | Neurology | -0.01795 | 0.0596   | 0.02765  | 0.853105 | 0.882024 | -1.50948 | 0.551313 | 0.6215   | -1.1959  |
| OID21085 | NID2     | Neurology | 4.686    | 4.72155  | 5.0341   | 0.502935 | 0.576433 | -1.0121  | 0.048956 | 0.08257  | 1.172916 |
| OID21086 | HARS1    | Neurology | 0.5842   | 1.0251   | 1.11555  | 0.005753 | 0.012584 | 1.264135 | 0.013804 | 0.029604 | 1.184436 |
| OID21087 | PEBP1    | Neurology | 6.50525  | 7.2594   | 7.2492   | 6.47E-07 | 1.2E-05  | 1.628733 | 1.4E-06  | 2.71E-05 | 1.692786 |
| OID21088 | SERPINB1 | Neurology | 3.8225   | 4.73955  | 4.07145  | 0.000209 | 0.000758 | 2.045424 | 0.005425 | 0.013852 | 1.358675 |
| OID21089 | IL17RA   | Neurology | 0.9167   | 0.90915  | 0.89545  | 0.708736 | 0.764432 | 1.014768 | 0.94853  | 0.959011 | 1.000555 |
| OID21090 | CLEC14A  | Neurology | 1.67465  | 0.72265  | 0.8214   | 1.2E-06  | 1.64E-05 | -1.77154 | 2.26E-06 | 3.69E-05 | -1.79957 |
| OID21091 | GP6      | Neurology | -1.6048  | -1.6552  | -1.20965 | 0.83251  | 0.866442 | -1.05662 | 0.189296 | 0.258516 | 1.116513 |
| OID21092 | CNTN3    | Neurology | 0.3438   | 0.2318   | 0.20695  | 0.013719 | 0.026947 | -1.13875 | 0.095476 | 0.146006 | -1.04932 |
| OID21093 | INHBC    | Neurology | -2.223   | -3.65985 | -2.94815 | 0.000373 | 0.001247 | -2.38064 | 0.045161 | 0.077128 | -1.656   |
| OID21094 | PIK3IP1  | Neurology | 5.41135  | 5.8989   | 5.95445  | 0.001566 | 0.004142 | 1.355805 | 0.003674 | 0.009912 | 1.478362 |
| OID21095 | NCAM2    | Neurology | 1.75265  | 0.24225  | 0.35615  | 1.93E-08 | 1.22E-06 | -2.48423 | 4.16E-08 | 3.26E-06 | -2.62551 |
| OID21096 | CA6      | Neurology | -3.59335 | -3.2149  | -3.0576  | 0.865439 | 0.890583 | 1.299944 | 0.696589 | 0.753551 | 1.562547 |
| OID21097 | SPINK1   | Neurology | 3.05765  | 3.80745  | 3.85245  | 0.00136  | 0.003687 | 1.4081   | 0.000638 | 0.002414 | 1.414459 |
| OID21098 | SUSD2    | Neurology | -0.24875 | -0.01265 | -0.06715 | 0.230857 | 0.297863 | 1.236318 | 0.095025 | 0.14552  | 1.184846 |
| OID21099 | MESD     | Neurology | 4.35025  | 3.42865  | 3.4863   | 0.000197 | 0.000727 | -1.88524 | 0.000244 | 0.001115 | -1.93657 |
| OID21100 | MPO      | Neurology | -3.6103  | -3.01795 | -2.8635  | 0.001652 | 0.004309 | 1.678357 | 0.000825 | 0.002885 | 1.687632 |
| OID21101 | GUCA2A   | Neurology | 2.54175  | 2.5602   | 2.7167   | 0.736012 | 0.785591 | 1.012871 | 0.913992 | 0.933547 | 1.006397 |
| OID21102 | PIGR     | Neurology | 1.38645  | 1.5777   | 1.6335   | 0.128222 | 0.181662 | 1.200512 | 0.133812 | 0.194862 | 1.160945 |
| OID21103 | MMP9     | Neurology | -2.04115 | -0.3686  | -0.76585 | 0.001106 | 0.003107 | 2.257381 | 0.000982 | 0.003358 | 1.89146  |
| OID21104 | THBS2    | Neurology | 2.34375  | 2.19095  | 2.29875  | 0.650817 | 0.710351 | -1.10336 | 0.599539 | 0.664272 | 1.218917 |
| OID21105 | PLA2G7   | Neurology | -2.6454  | -3.66675 | -3.61775 | 0.002769 | 0.006683 | -2.06859 | 0.035973 | 0.063605 | -2.11741 |
| OID21106 | NOMO1    | Neurology | 2.35645  | 1.11465  | 1.2859   | 1.8E-07  | 5.23E-06 | -2.2061  | 1.96E-06 | 3.32E-05 | -1.98618 |
| OID21107 | TNXB     | Neurology | -0.0238  | -0.70475 | -0.43365 | 0.00116  | 0.003208 | -1.38819 | 0.020562 | 0.040754 | -1.25553 |
| OID21108 | CD109    | Neurology | -0.41915 | -0.29035 | -0.3583  | 0.543783 | 0.614906 | -1.0864  | 0.790276 | 0.834349 | 1.039615 |

|          |         |           |          |          |          |          |          |          |          |          |          |
|----------|---------|-----------|----------|----------|----------|----------|----------|----------|----------|----------|----------|
| OID21109 | SPINT1  | Neurology | 2.06845  | 1.89205  | 2.0968   | 0.157416 | 0.216867 | -1.11736 | 0.610329 | 0.673509 | 1.001596 |
| OID21110 | CD99    | Neurology | 2.688    | 3.28715  | 3.18955  | 0.000627 | 0.001951 | 1.218833 | 0.001034 | 0.003495 | 1.345507 |
| OID21111 | FCRL5   | Neurology | -6.24025 | -5.6193  | -5.21155 | 0.02604  | 0.046566 | 2.256442 | 0.00111  | 0.003674 | 2.008544 |
| OID21112 | CLEC11A | Neurology | 1.3528   | -1.77955 | -0.8648  | 3.35E-06 | 3.44E-05 | -5.04533 | 0.000179 | 0.000869 | -3.63965 |
| OID21113 | DSG2    | Neurology | 1.86035  | 2.1761   | 2.23565  | 0.109904 | 0.159622 | 1.14021  | 0.045861 | 0.078192 | 1.241126 |
| OID21114 | SOD2    | Neurology | 1.94785  | 2.10425  | 2.18135  | 0.032235 | 0.055477 | 1.213185 | 0.025452 | 0.048018 | 1.247725 |
| OID21115 | NUDT5   | Neurology | 4.13835  | 3.97865  | 3.9479   | 0.225963 | 0.292579 | -1.01157 | 0.326102 | 0.40968  | -1.12264 |
| OID21116 | IL1R1   | Neurology | 2.19465  | 1.6797   | 1.8388   | 3.81E-05 | 0.000183 | -1.5132  | 0.001656 | 0.005165 | -1.33284 |
| OID21117 | CNTN4   | Neurology | 4.81255  | 4.8968   | 4.87615  | 0.527727 | 0.599839 | 1.065293 | 0.448207 | 0.52522  | 1.059953 |
| OID21118 | TMSB10  | Neurology | 4.9713   | 6.09695  | 6.00765  | 2.42E-05 | 0.000131 | 2.005553 | 0.000178 | 0.000869 | 1.979999 |
| OID21119 | CD177   | Neurology | -0.76575 | -0.3837  | -0.2216  | 0.156321 | 0.215628 | 1.242977 | 0.00748  | 0.017925 | 1.36822  |
| OID21120 | TREML2  | Neurology | -2.16695 | -1.69275 | -1.85465 | 0.543013 | 0.614668 | 1.018291 | 0.273186 | 0.352064 | 1.169871 |
| OID21121 | MYOC    | Neurology | 8.2328   | 8.0403   | 8.2921   | 0.732236 | 0.783621 | -1.06382 | 0.192315 | 0.261663 | 1.301567 |
| OID21122 | CD99L2  | Neurology | 4.65405  | 5.291    | 5.28035  | 0.000139 | 0.00054  | 1.642508 | 0.000464 | 0.001887 | 1.614626 |
| OID21123 | OGN     | Neurology | 3.52745  | 3.85375  | 4.1673   | 0.357993 | 0.431477 | 1.226672 | 0.042504 | 0.073379 | 1.327397 |
| OID21124 | PLAU    | Neurology | 2.17215  | 0.85165  | 1.31095  | 0.002914 | 0.006955 | -1.94963 | 0.068719 | 0.109991 | -1.6052  |
| OID21125 | EFNA1   | Neurology | 4.66345  | 5.0931   | 5.1235   | 4.52E-06 | 4.07E-05 | 1.426965 | 1.92E-06 | 3.32E-05 | 1.469882 |
| OID21126 | IL1RAP  | Neurology | -0.2627  | -0.37215 | -0.1321  | 0.008608 | 0.017968 | -1.07882 | 0.564067 | 0.63263  | 1.04888  |
| OID21127 | B4GAT1  | Neurology | 4.76285  | 5.9123   | 5.97875  | 8.44E-06 | 5.9E-05  | 2.611991 | 1.39E-05 | 0.000123 | 1.778795 |
| OID21128 | ALDH1A1 | Neurology | 0.55795  | 0.59305  | 1.25205  | 0.076042 | 0.116126 | 1.571944 | 0.055404 | 0.092312 | 1.655251 |
| OID21129 | PILRA   | Neurology | 3.4424   | 3.18275  | 3.38765  | 0.719653 | 0.773926 | -1.12183 | 0.345705 | 0.42602  | 1.056945 |
| OID21130 | CD300LG | Neurology | -0.41125 | 0.0078   | -0.00095 | 0.145027 | 0.202669 | 1.066179 | 0.009751 | 0.022167 | 1.184107 |
| OID21131 | PECAM1  | Neurology | -0.2224  | -0.0757  | -0.12035 | 0.606443 | 0.669894 | 1.096306 | 0.49146  | 0.56505  | 1.033437 |
| OID21132 | GNLY    | Neurology | -0.9498  | -2.53615 | -2.29505 | 0.0042   | 0.009627 | -2.69279 | 0.008794 | 0.020372 | -2.54074 |
| OID21133 | FCER2   | Neurology | 0.1392   | 0.0019   | 0.21715  | 0.825623 | 0.860906 | -1.00598 | 0.049096 | 0.082681 | 1.088167 |
| OID21134 | MFGE8   | Neurology | 6.8164   | 6.6397   | 6.65385  | 0.3147   | 0.386499 | 1.24104  | 0.568513 | 0.635669 | 1.212009 |
| OID21135 | TXNRD1  | Neurology | 2.6228   | 2.70875  | 2.66905  | 0.008515 | 0.017808 | 1.170764 | 0.216242 | 0.287844 | -1.00497 |
| OID21136 | IL7R    | Neurology | -1.8892  | -1.97365 | -1.7751  | 0.076559 | 0.116752 | -1.15926 | 0.832231 | 0.869448 | -1.07177 |
| OID21137 | HAVCR2  | Neurology | 4.0934   | 3.23005  | 3.4331   | 0.000111 | 0.00045  | -1.50822 | 0.00209  | 0.00617  | -1.32726 |

|          |          |                     |          |          |          |          |          |          |          |          |          |
|----------|----------|---------------------|----------|----------|----------|----------|----------|----------|----------|----------|----------|
| OID21138 | ARSA     | Neurology           | 5.12345  | 5.6496   | 5.74105  | 0.002246 | 0.005567 | 1.457504 | 0.002822 | 0.007926 | 1.815919 |
| OID21139 | ITGA5    | Neurology           | -3.28495 | -3.18815 | -3.07195 | 0.576377 | 0.642499 | 1.069362 | 0.30566  | 0.387546 | 1.039543 |
| OID21140 | FYB1     | Neurology           | -3.0707  | -3.58945 | -3.49915 | 0.429488 | 0.502749 | -1.41593 | 0.520502 | 0.591015 | -1.4082  |
| OID21141 | BLVRB    | Neurology           | 0.12485  | 1.203    | 0.92355  | 0.001215 | 0.003341 | 1.888316 | 0.062555 | 0.102441 | 1.514037 |
| OID21142 | RELT     | Neurology           | 7.03895  | 5.70565  | 6.0281   | 0.000583 | 0.001839 | -2.15823 | 0.000697 | 0.002551 | -1.60798 |
| OID21143 | DBI      | Neurology           | 5.29325  | 5.8902   | 5.768    | 2.82E-05 | 0.000148 | 1.473707 | 0.000101 | 0.000531 | 1.372209 |
| OID21144 | VSIG4    | Neurology           | 3.41215  | 4.32885  | 3.826    | 4.3E-05  | 0.000203 | 1.736943 | 0.025635 | 0.048033 | 1.319462 |
| OID21145 | TNFRSF1B | Neurology           | 2.91535  | 2.916    | 2.8639   | 0.562548 | 0.630693 | 1.025587 | 0.863677 | 0.894639 | -1.05172 |
| OID21146 | IGF2R    | Neurology           | 1.18715  | 0.85105  | 0.9559   | 0.001437 | 0.003848 | -1.25671 | 0.023068 | 0.044618 | -1.16078 |
| OID21147 | TIMP4    | Neurology           | 2.85125  | 1.4661   | 1.56065  | 3.32E-05 | 0.000166 | -2.57041 | 0.000186 | 0.00089  | -2.46776 |
| OID21148 | SPINK5   | Neurology           | -0.68965 | -0.30295 | -0.16175 | 1.04E-05 | 7.12E-05 | 1.334963 | 2.92E-07 | 1.1E-05  | 1.504308 |
| OID21149 | CA2      | Neurology           | 3.48325  | 3.47575  | 3.6376   | 0.11398  | 0.164239 | 1.464289 | 0.309302 | 0.39126  | 1.289311 |
| OID21150 | CTRB1    | Neurology           | 0.59755  | 0.8892   | 1.25795  | 0.478521 | 0.553653 | 1.063706 | 0.00668  | 0.016333 | 1.35327  |
| OID21151 | F11R     | Neurology           | 1.4677   | 1.58565  | 1.62055  | 0.254393 | 0.324418 | -1.00274 | 0.230414 | 0.304812 | 1.112342 |
| OID21152 | LILRA2   | Neurology           | -0.91395 | -1.03235 | -1.11875 | 0.007508 | 0.015914 | -1.23038 | 0.018159 | 0.036788 | -1.12998 |
| OID21153 | PAMR1    | Neurology           | 0.3813   | -2.0812  | -1.38275 | 3.89E-07 | 8.71E-06 | -6.19584 | 1.14E-05 | 0.000111 | -4.01862 |
| OID21154 | TFF1     | Neurology           | 3.5362   | 4.50825  | 4.40095  | 0.002154 | 0.005403 | 1.365425 | 0.00258  | 0.007376 | 1.6383   |
| OID21155 | TNFRSF1A | Neurology           | 4.7799   | 4.68335  | 4.65215  | 0.444671 | 0.518311 | 1.053945 | 0.646129 | 0.706624 | -1.0049  |
| OID21156 | CLPS     | Neurology           | -0.9214  | -2.3324  | -2.1661  | 1.12E-05 | 7.4E-05  | -2.95806 | 5.95E-05 | 0.000359 | -3.64066 |
| OID21157 | STC2     | Neurology           | 3.3009   | 3.42855  | 3.51415  | 0.002174 | 0.005438 | 1.159216 | 0.001534 | 0.004839 | 1.241514 |
| OID21158 | IGFBP4   | Neurology           | 4.7061   | 1.89495  | 2.812    | 0.001883 | 0.00483  | -2.51411 | 0.012365 | 0.027252 | -1.8569  |
| OID21159 | GRN      | Neurology           | 1.89455  | 1.85315  | 2.08635  | 0.200584 | 0.26725  | 1.033687 | 0.00064  | 0.002415 | 1.03742  |
| OID21160 | PARK7    | Neurology           | 4.2802   | 4.6736   | 4.7602   | 8.65E-05 | 0.000365 | 1.397308 | 0.000321 | 0.001393 | 1.502641 |
| OID30420 | DAND5    | Inflammat<br>ion_II | -0.2923  | 0.19855  | 0.59315  | 0.095776 | 0.141538 | 1.718143 | 0.026908 | 0.050053 | 2.470324 |
| OID30430 | FOLH1    | Inflammat<br>ion_II | -0.70795 | -0.91495 | -0.7263  | 0.789707 | 0.832148 | -1.03552 | 0.504848 | 0.575621 | -1.10995 |
| OID30442 | ST8SIA1  | Inflammat<br>ion_II | 3.79095  | 2.4374   | 2.66795  | 1.79E-12 | 1.97E-09 | -2.86126 | 9.72E-11 | 1.07E-07 | -2.62133 |

|          |         |                     |          |          |          |          |          |          |          |          |          |
|----------|---------|---------------------|----------|----------|----------|----------|----------|----------|----------|----------|----------|
| OID30447 | UNC5D   | Inflammat<br>ion_II | 2.86345  | 2.03565  | 2.16325  | 3.47E-07 | 8.17E-06 | -1.62586 | 4.05E-07 | 1.39E-05 | -1.64103 |
| OID30449 | GAD2    | Inflammat<br>ion_II | 0.80465  | 0.81605  | 1.01985  | 0.636857 | 0.700671 | -1.01428 | 0.631477 | 0.693362 | 1.153805 |
| OID30451 | NME1    | Inflammat<br>ion_II | 0.284    | 0.8236   | 0.7865   | 0.217665 | 0.285232 | 1.256012 | 0.053495 | 0.089403 | 2.071822 |
| OID30454 | FGF12   | Inflammat<br>ion_II | 0.12685  | 0.1199   | 0.44285  | 0.409216 | 0.48262  | -1.1113  | 0.127425 | 0.18655  | 1.113846 |
| OID30460 | PGR     | Inflammat<br>ion_II | -0.52765 | 0.196    | 0.26315  | 0.01681  | 0.031878 | 1.214995 | 0.06815  | 0.109239 | 1.954094 |
| OID30464 | KLRF1   | Inflammat<br>ion_II | -3.13895 | -2.0554  | -1.9909  | 0.024892 | 0.044733 | 1.549551 | 0.013199 | 0.028754 | 2.182528 |
| OID30477 | SMPD3   | Inflammat<br>ion_II | -0.35405 | 0.05195  | 0.24525  | 0.065793 | 0.102179 | 1.237947 | 0.009218 | 0.02109  | 1.615522 |
| OID30479 | TRAF3   | Inflammat<br>ion_II | -1.1907  | -0.41135 | -0.58115 | 0.0377   | 0.063295 | 1.799879 | 0.015107 | 0.031693 | 1.525783 |
| OID30480 | TERF1   | Inflammat<br>ion_II | 1.5341   | 1.1723   | 1.06405  | 0.022417 | 0.040886 | -1.13002 | 0.028819 | 0.052916 | -1.33904 |
| OID30481 | HS6ST2  | Inflammat<br>ion_II | 2.37125  | 1.5329   | 1.3656   | 1.13E-09 | 2.47E-07 | -1.76804 | 2.58E-10 | 1.19E-07 | -1.89343 |
| OID30483 | PRSS22  | Inflammat<br>ion_II | -1.32415 | -1.28435 | -1.0206  | 0.377591 | 0.453605 | -1.0147  | 0.021101 | 0.041595 | 1.297739 |
| OID30491 | ADAM12  | Inflammat<br>ion_II | -1.57545 | -1.1426  | -0.97345 | 0.023339 | 0.042287 | 1.331405 | 0.005611 | 0.014196 | 1.839993 |
| OID30509 | NAGA    | Inflammat<br>ion_II | 2.5785   | 2.15095  | 2.05935  | 0.001093 | 0.003093 | -1.35336 | 0.001468 | 0.004687 | -1.22846 |
| OID30510 | SLITRK1 | Inflammat<br>ion_II | -0.1413  | -0.9791  | -0.95345 | 3.84E-06 | 3.73E-05 | -2.00555 | 4.82E-05 | 0.000308 | -1.75583 |
| OID30515 | C1QL2   | Inflammat<br>ion_II | 4.26365  | 3.16365  | 3.21715  | 1.44E-07 | 5.09E-06 | -1.95051 | 1.59E-06 | 2.91E-05 | -1.9288  |
| OID30517 | TYRP1   | Inflammat<br>ion_II | 5.12255  | 4.61865  | 4.6991   | 0.000166 | 0.000629 | -1.29769 | 0.001566 | 0.004914 | -1.18079 |

|          |         |                     |          |          |          |          |          |          |          |          |          |
|----------|---------|---------------------|----------|----------|----------|----------|----------|----------|----------|----------|----------|
| OID30525 | BNIP3L  | Inflammat<br>ion_II | 1.7138   | 1.445    | 1.1758   | 0.065063 | 0.101189 | -1.17198 | 0.034987 | 0.062162 | -1.282   |
| OID30528 | ADAMTS1 | Inflammat<br>ion_II | 4.0651   | 2.7937   | 2.95045  | 0.000162 | 0.000618 | -2.5295  | 0.023081 | 0.044618 | -1.53677 |
| OID30529 | S100A13 | Inflammat<br>ion_II | 0.0268   | 1.3065   | 1.1855   | 2.65E-05 | 0.000141 | 2.163849 | 3.54E-05 | 0.000246 | 2.237209 |
| OID30531 | SEMA6C  | Inflammat<br>ion_II | -1.2821  | -0.87355 | -0.81705 | 0.031957 | 0.055171 | 1.1776   | 0.092145 | 0.141701 | 1.229098 |
| OID30536 | STAT2   | Inflammat<br>ion_II | -2.3597  | -1.77395 | -1.24235 | 0.005076 | 0.011329 | 1.956602 | 0.004483 | 0.011719 | 1.973354 |
| OID30538 | MTDH    | Inflammat<br>ion_II | -3.1534  | -1.07865 | -1.8894  | 0.000309 | 0.001042 | 2.738527 | 0.054433 | 0.090833 | 2.071822 |
| OID30539 | ERMAP   | Inflammat<br>ion_II | -2.4715  | -2.95535 | -2.9907  | 0.052353 | 0.083673 | -1.27235 | 0.188112 | 0.257219 | -1.1319  |
| OID30542 | GIPR    | Inflammat<br>ion_II | -0.0836  | 0.0974   | 0.21455  | 0.566994 | 0.634617 | 1.1776   | 0.227688 | 0.30161  | 1.241126 |
| OID30545 | NECTIN1 | Inflammat<br>ion_II | 0.82805  | 0.7915   | 0.6334   | 0.089752 | 0.133715 | -1.1113  | 0.020251 | 0.040282 | 1.032971 |
| OID30547 | LMOD1   | Inflammat<br>ion_II | -2.29495 | -1.8896  | -1.604   | 0.110059 | 0.159637 | 1.331359 | 0.004809 | 0.012453 | 1.338299 |
| OID30554 | VEGFB   | Inflammat<br>ion_II | -1.2623  | -1.7684  | -1.8974  | 0.017653 | 0.033361 | -1.45665 | 0.004346 | 0.011396 | -1.47734 |
| OID30559 | TOP2B   | Inflammat<br>ion_II | -2.9385  | -3.0256  | -2.29305 | 0.949555 | 0.957402 | -1.11069 | 0.441511 | 0.519036 | 1.594606 |
| OID30564 | PPL     | Inflammat<br>ion_II | -2.2201  | -0.8408  | -0.8741  | 0.001498 | 0.003983 | 1.728475 | 0.005128 | 0.013187 | 2.407774 |
| OID30565 | NXP3    | Inflammat<br>ion_II | 2.87555  | 2.3775   | 2.5267   | 0.000533 | 0.001712 | -1.37817 | 0.003804 | 0.010213 | -1.1911  |
| OID30573 | PDIA3   | Inflammat<br>ion_II | 0.4403   | -0.05475 | 0.2559   | 0.005877 | 0.012802 | -1.2902  | 0.156565 | 0.220157 | -1.2174  |
| OID30574 | GHR     | Inflammat<br>ion_II | -3.10665 | -2.45985 | -2.67785 | 0.004115 | 0.009453 | 1.651584 | 0.039421 | 0.068597 | 1.526471 |

|          |          |                     |          |          |          |          |          |          |          |          |          |
|----------|----------|---------------------|----------|----------|----------|----------|----------|----------|----------|----------|----------|
| OID30575 | BMP10    | Inflammat<br>ion_II | -5.31525 | -4.8891  | -5.057   | 0.102263 | 0.149514 | 1.190692 | 0.49282  | 0.566021 | 1.065995 |
| OID30576 | CD300A   | Inflammat<br>ion_II | -0.8317  | -0.88415 | -0.88325 | 0.891994 | 0.915335 | 1.062785 | 0.504748 | 0.575621 | 1.11265  |
| OID30578 | ERP29    | Inflammat<br>ion_II | -1.51185 | -0.96725 | -0.63095 | 0.028194 | 0.04985  | 1.311302 | 0.004231 | 0.011141 | 1.786703 |
| OID30579 | HEG1     | Inflammat<br>ion_II | -2.133   | -2.5309  | -2.5118  | 0.000659 | 0.002028 | -1.3169  | 0.000615 | 0.002359 | -1.30387 |
| OID30580 | DTD1     | Inflammat<br>ion_II | 1.1256   | 1.5006   | 1.5734   | 0.057898 | 0.090817 | 1.250712 | 0.01086  | 0.024286 | 1.478158 |
| OID30581 | CST1     | Inflammat<br>ion_II | -1.0227  | -0.9302  | -0.29025 | 0.637795 | 0.700999 | 1.088506 | 0.900723 | 0.92343  | 1.466523 |
| OID30582 | DIPK2B   | Inflammat<br>ion_II | -1.1255  | -3.2034  | -2.5197  | 6.84E-07 | 1.25E-05 | -3.74444 | 3.32E-05 | 0.000234 | -3.22746 |
| OID30583 | MXRA8    | Inflammat<br>ion_II | 0.586    | 0.522    | 0.6385   | 0.790919 | 0.832626 | -1.12479 | 0.342461 | 0.423448 | 1.065293 |
| OID30585 | ACHE     | Inflammat<br>ion_II | 4.8647   | 4.95085  | 4.994    | 0.186401 | 0.250819 | 1.106152 | 0.56534  | 0.633411 | 1.026974 |
| OID30586 | JAM3     | Inflammat<br>ion_II | 5.6882   | 5.4718   | 5.4862   | 0.146431 | 0.204037 | -1.09684 | 0.064956 | 0.105505 | -1.14211 |
| OID30587 | COL5A1   | Inflammat<br>ion_II | 1.54525  | 1.01065  | 1.2183   | 0.018469 | 0.034785 | -1.35238 | 0.134909 | 0.195939 | -1.41451 |
| OID30588 | ADGRD1   | Inflammat<br>ion_II | -2.51155 | -3.03585 | -2.80235 | 0.002044 | 0.005195 | -1.58058 | 0.015826 | 0.032725 | -1.39581 |
| OID30589 | TNFRSF17 | Inflammat<br>ion_II | -2.94645 | -3.31775 | -3.0004  | 0.67954  | 0.735833 | -1.25028 | 0.429655 | 0.506182 | -1.00521 |
| OID30590 | APPL2    | Inflammat<br>ion_II | -2.3923  | -2.43395 | -2.22665 | 0.261956 | 0.333288 | 1.112997 | 0.178134 | 0.246336 | 1.124123 |
| OID30591 | PAXX     | Inflammat<br>ion_II | -3.3618  | -4.3911  | -4.27395 | 0.004643 | 0.010447 | -2.03313 | 0.011532 | 0.025737 | -1.71    |
| OID30592 | HMCN2    | Inflammat<br>ion_II | -5.9459  | -6.1592  | -6.509   | 4.38E-06 | 4.05E-05 | -1.99868 | 7.36E-06 | 8.34E-05 | -1.79683 |

|          |          |                     |          |          |          |          |          |          |          |          |          |
|----------|----------|---------------------|----------|----------|----------|----------|----------|----------|----------|----------|----------|
| OID30593 | CELSR2   | Inflammat<br>ion_II | 2.46845  | -0.3161  | 0.2005   | 0.00027  | 0.000948 | -3.63751 | 0.001425 | 0.004563 | -2.22075 |
| OID30594 | GLA      | Inflammat<br>ion_II | -0.0639  | -0.82135 | -0.70365 | 0.048532 | 0.078596 | -1.55882 | 0.127105 | 0.186329 | -1.1743  |
| OID30595 | MENT     | Inflammat<br>ion_II | -4.6658  | -6.0769  | -5.3456  | 5.19E-07 | 1.06E-05 | -2.56641 | 0.000127 | 0.00064  | -1.69484 |
| OID30596 | PSTPIP2  | Inflammat<br>ion_II | -4.0026  | -3.89195 | -3.92915 | 0.383424 | 0.459414 | 1.075383 | 0.176471 | 0.244652 | 1.008527 |
| OID30597 | GNPDA2   | Inflammat<br>ion_II | -1.7769  | -0.97085 | -1.18255 | 1.52E-05 | 9.32E-05 | 1.67702  | 0.000658 | 0.002467 | 1.293742 |
| OID30598 | MFAP4    | Inflammat<br>ion_II | 2.1257   | 2.55275  | 2.59535  | 0.20851  | 0.275504 | 1.361078 | 0.195461 | 0.26547  | 1.545207 |
| OID30599 | SEMA3G   | Inflammat<br>ion_II | -1.22385 | -1.96795 | -1.56385 | 0.00162  | 0.004256 | -1.49231 | 0.154109 | 0.218056 | -1.17887 |
| OID30600 | GAPDH    | Inflammat<br>ion_II | -1.7166  | -0.07715 | -0.4381  | 0.037136 | 0.062539 | 2.731039 | 0.118342 | 0.176308 | 2.562408 |
| OID30601 | RLN2     | Inflammat<br>ion_II | 1.04395  | -2.76615 | -2.18285 | 6.24E-06 | 5E-05    | -10.8849 | 1.37E-05 | 0.000123 | -7.75002 |
| OID30602 | DDI2     | Inflammat<br>ion_II | -3.828   | -2.93965 | -3.7199  | 0.024739 | 0.044531 | 1.31736  | 0.400394 | 0.479425 | 1.235547 |
| OID30603 | UROD     | Inflammat<br>ion_II | -2.17215 | -0.61185 | -0.72685 | 1.42E-05 | 8.87E-05 | 2.87398  | 8.31E-05 | 0.000473 | 2.270484 |
| OID30604 | SERPINI1 | Inflammat<br>ion_II | 3.248    | 4.59785  | 4.51985  | 1.04E-05 | 7.12E-05 | 2.627972 | 2.67E-05 | 0.000198 | 2.664196 |
| OID30605 | YWHAQ    | Inflammat<br>ion_II | -1.2075  | -0.00325 | -0.42695 | 0.002071 | 0.005251 | 2.198927 | 0.016943 | 0.034709 | 1.595767 |
| OID30606 | CPA4     | Inflammat<br>ion_II | -1.28635 | -1.29705 | -1.21855 | 0.5781   | 0.643766 | 1.094256 | 0.239449 | 0.31225  | 1.066216 |
| OID30607 | PRR4     | Inflammat<br>ion_II | -1.12585 | 0.40625  | 0.43285  | 0.11023  | 0.159673 | 1.066586 | 0.025591 | 0.048033 | 1.954839 |
| OID30608 | LEG1     | Inflammat<br>ion_II | -4.2408  | -3.92235 | -4.04555 | 0.939982 | 0.949494 | 1.511153 | 0.617195 | 0.679038 | 1.021578 |



|          |         |                     |          |          |          |          |          |          |          |          |          |
|----------|---------|---------------------|----------|----------|----------|----------|----------|----------|----------|----------|----------|
| OID30609 | TPD52L2 | Inflammat<br>ion_II | -4.3508  | -4.3192  | -4.44895 | 0.312798 | 0.385036 | -1.03108 | 0.64717  | 0.707058 | 1.241126 |
| OID30610 | PCBD1   | Inflammat<br>ion_II | 0.71285  | 1.32245  | 1.63485  | 0.000268 | 0.000948 | 1.527847 | 3.29E-05 | 0.000233 | 1.794087 |
| OID30611 | GP5     | Inflammat<br>ion_II | -6.2746  | -5.5849  | -5.7566  | 0.022857 | 0.041483 | 1.267952 | 0.043796 | 0.075373 | 1.323171 |
| OID30613 | DNAJB6  | Inflammat<br>ion_II | 0.6605   | 0.67625  | 0.58885  | 0.752797 | 0.798619 | 1.048371 | 0.760991 | 0.809659 | 1.086132 |
| OID30614 | NHLRC3  | Inflammat<br>ion_II | 3.5274   | 3.39745  | 3.39775  | 0.254364 | 0.324418 | -1.09426 | 0.141829 | 0.203036 | -1.03908 |
| OID30615 | BMPER   | Inflammat<br>ion_II | -0.34785 | -1.15125 | -0.97145 | 0.000192 | 0.000714 | -1.71677 | 0.014527 | 0.030816 | -1.38867 |
| OID30616 | TBCA    | Inflammat<br>ion_II | -0.05035 | -0.29075 | -0.46565 | 0.428642 | 0.502293 | -1.03372 | 0.980356 | 0.984841 | -1.26427 |
| OID30617 | ANXA1   | Inflammat<br>ion_II | -2.52555 | 0.08365  | -0.20585 | 0.000151 | 0.000582 | 3.340815 | 0.00059  | 0.002307 | 5.770315 |
| OID30618 | C1QTNF5 | Inflammat<br>ion_II | 1.86805  | 1.4496   | 1.62705  | 0.044327 | 0.07308  | -1.4343  | 0.333524 | 0.416621 | -1.05172 |
| OID30619 | CRELD1  | Inflammat<br>ion_II | -1.5074  | -3.20205 | -3.0408  | 1.94E-09 | 2.67E-07 | -2.77233 | 9.25E-10 | 2.03E-07 | -3.29825 |
| OID30620 | C1QTNF9 | Inflammat<br>ion_II | -3.36615 | -3.50515 | -3.3717  | 0.28432  | 0.355967 | -1.04236 | 0.116281 | 0.17371  | 1.03724  |
| OID30622 | EPHA4   | Inflammat<br>ion_II | -0.68565 | -1.8448  | -1.78825 | 5.14E-07 | 1.06E-05 | -2.13909 | 3.71E-07 | 1.32E-05 | -2.36723 |
| OID30623 | GMPR2   | Inflammat<br>ion_II | -0.2317  | 1.7519   | 1.02535  | 3.38E-05 | 0.000168 | 4.061464 | 0.00115  | 0.003793 | 2.638833 |
| OID30624 | ST13    | Inflammat<br>ion_II | -4.42365 | -3.79235 | -4.1649  | 0.026805 | 0.047701 | 1.383526 | 0.059941 | 0.098821 | 1.403812 |
| OID30625 | INHBB   | Inflammat<br>ion_II | -2.8684  | -3.7201  | -3.80015 | 0.061027 | 0.095589 | -1.66238 | 0.022178 | 0.043254 | -1.8501  |
| OID30626 | FUOM    | Inflammat<br>ion_II | -4.41175 | -4.0629  | -3.9359  | 0.09538  | 0.141143 | 1.153526 | 0.006052 | 0.015104 | 1.437289 |

|          |          |                     |          |          |          |          |          |          |          |          |          |
|----------|----------|---------------------|----------|----------|----------|----------|----------|----------|----------|----------|----------|
| OID30627 | SPINK2   | Inflammat<br>ion_II | -0.9846  | -1.65065 | -1.39565 | 0.000843 | 0.002502 | -1.5481  | 0.006433 | 0.015908 | -1.41363 |
| OID30628 | CTSE     | Inflammat<br>ion_II | -2.6738  | -2.8525  | -2.90475 | 0.184372 | 0.248698 | -1.24151 | 0.950017 | 0.959631 | -1.02958 |
| OID30630 | SLC9A3R1 | Inflammat<br>ion_II | -1.17385 | -1.4244  | -1.73535 | 0.274914 | 0.345372 | -1.62119 | 0.045167 | 0.077128 | -1.56417 |
| OID30631 | GCHFR    | Inflammat<br>ion_II | 0.6734   | 1.49945  | 1.7019   | 1.49E-06 | 1.95E-05 | 2.046913 | 8.6E-05  | 0.000487 | 1.898618 |
| OID30632 | TP53I3   | Inflammat<br>ion_II | -1.32615 | 1.3898   | 0.8212   | 1.52E-06 | 1.95E-05 | 3.480151 | 1.37E-05 | 0.000123 | 3.488363 |
| OID30633 | MYOM3    | Inflammat<br>ion_II | -5.2204  | -4.64555 | -4.59795 | 0.018695 | 0.035149 | 1.423162 | 0.021276 | 0.041866 | 1.446283 |
| OID30634 | PHYKPL   | Inflammat<br>ion_II | -1.83775 | -1.02315 | -1.1767  | 0.000106 | 0.000434 | 1.769081 | 0.001404 | 0.004507 | 1.639209 |
| OID30635 | RIDA     | Inflammat<br>ion_II | 0.91495  | 0.58595  | 0.6407   | 0.000347 | 0.001168 | -1.12553 | 0.002075 | 0.006141 | -1.25666 |
| OID30638 | MOCS2    | Inflammat<br>ion_II | -0.6614  | -0.71235 | -0.5809  | 0.650831 | 0.710351 | -1.05522 | 0.355585 | 0.436237 | -1.02605 |
| OID30639 | GIMAP7   | Inflammat<br>ion_II | -2.2948  | -2.3526  | -2.10265 | 0.643076 | 0.705687 | -1.09293 | 0.997632 | 0.998161 | 1.136738 |
| OID30640 | VTI1A    | Inflammat<br>ion_II | 2.14825  | 1.61045  | 1.57115  | 3.95E-05 | 0.000188 | -1.40644 | 2.03E-06 | 3.37E-05 | -1.57778 |
| OID30641 | CD72     | Inflammat<br>ion_II | -3.32355 | -3.69875 | -3.098   | 0.863383 | 0.889301 | -1.1113  | 0.033329 | 0.059602 | 1.238935 |
| OID30642 | ACYP1    | Inflammat<br>ion_II | 1.9826   | 2.10395  | 2.11665  | 0.180699 | 0.244948 | 1.248504 | 0.333031 | 0.416478 | 1.154846 |
| OID30643 | NAGPA    | Inflammat<br>ion_II | -2.83825 | -3.311   | -3.26705 | 0.003556 | 0.008324 | -1.30554 | 0.008011 | 0.018956 | -1.16663 |
| OID30646 | FGFR4    | Inflammat<br>ion_II | -3.17065 | -3.8324  | -3.7284  | 3.78E-06 | 3.7E-05  | -1.69144 | 0.00032  | 0.001393 | -1.35079 |
| OID30647 | RABEP1   | Inflammat<br>ion_II | -1.35185 | -1.2563  | -0.86105 | 0.14508  | 0.202669 | 1.176621 | 0.024364 | 0.046363 | 1.528747 |

|          |              |                     |          |          |          |          |          |          |          |          |          |
|----------|--------------|---------------------|----------|----------|----------|----------|----------|----------|----------|----------|----------|
| OID30648 | SFRP4        | Inflammat<br>ion_II | 0.07465  | -0.0299  | 0.0078   | 0.480557 | 0.555047 | 1.035229 | 0.666774 | 0.725587 | -1.02562 |
| OID30649 | CACYBP       | Inflammat<br>ion_II | -2.4691  | -2.27205 | -2.2959  | 0.223433 | 0.290675 | 1.006432 | 0.773893 | 0.82259  | 1.033401 |
| OID30650 | SUSD5        | Inflammat<br>ion_II | 0.6541   | -0.70585 | -0.63335 | 6.08E-07 | 1.17E-05 | -2.62733 | 5.12E-07 | 1.56E-05 | -2.31362 |
| OID30652 | KLK7         | Inflammat<br>ion_II | -2.4771  | -1.5163  | -1.4367  | 0.002954 | 0.007035 | 1.732313 | 0.003058 | 0.008521 | 2.002011 |
| OID30653 | ARHGAP4<br>5 | Inflammat<br>ion_II | -1.79    | -1.21735 | -1.4156  | 0.117029 | 0.16819  | 1.1776   | 0.408562 | 0.48635  | 1.223234 |
| OID30654 | UBXN1        | Inflammat<br>ion_II | -1.7617  | -0.80255 | -1.10655 | 0.000676 | 0.002055 | 1.754123 | 0.002507 | 0.007207 | 2.0114   |
| OID30655 | ADD1         | Inflammat<br>ion_II | -2.45525 | -2.28915 | -2.4715  | 0.815771 | 0.852251 | 1.183041 | 0.899403 | 0.923063 | 1.097979 |
| OID30656 | SPART        | Inflammat<br>ion_II | -0.27905 | -1.12235 | -0.9867  | 0.000579 | 0.001832 | -1.6517  | 0.00922  | 0.02109  | -1.67446 |
| OID30658 | MARS1        | Inflammat<br>ion_II | -0.3586  | -0.69015 | -0.6528  | 0.574095 | 0.641258 | -1.1113  | 0.361793 | 0.442527 | -1.1414  |
| OID30659 | PTRHD1       | Inflammat<br>ion_II | -1.77155 | 1.05175  | 0.74015  | 7.61E-06 | 5.64E-05 | 6.359662 | 0.000722 | 0.002624 | 3.198953 |
| OID30660 | CHAD         | Inflammat<br>ion_II | -2.7962  | -1.8228  | -1.58495 | 0.00063  | 0.001954 | 1.872739 | 1.14E-05 | 0.000111 | 2.168955 |
| OID30661 | DNAJB2       | Inflammat<br>ion_II | -0.05225 | -0.6054  | -0.6089  | 0.014567 | 0.028259 | -1.39566 | 0.007097 | 0.017241 | -1.36084 |
| OID30662 | SDK2         | Inflammat<br>ion_II | -0.9598  | -1.19765 | -1.46515 | 0.079061 | 0.119571 | -1.22137 | 0.026889 | 0.050053 | -1.35858 |
| OID30665 | OLFM4        | Inflammat<br>ion_II | -2.1912  | -1.80235 | -2.08985 | 0.128395 | 0.181673 | 1.216722 | 0.363357 | 0.443789 | -1.03491 |
| OID30666 | PENK         | Inflammat<br>ion_II | 3.20685  | 1.2219   | 1.07115  | 1.11E-05 | 7.4E-05  | -2.63381 | 3.72E-05 | 0.000254 | -2.72225 |
| OID30668 | PRDX2        | Inflammat<br>ion_II | 0.7968   | 0.55175  | 0.45945  | 0.425572 | 0.499762 | -1.14231 | 0.965551 | 0.972638 | -1.14878 |

|          |                    |                     |         |          |         |          |          |          |          |          |          |
|----------|--------------------|---------------------|---------|----------|---------|----------|----------|----------|----------|----------|----------|
| OID30669 | MDH1               | Inflammat<br>ion_II | 7.30185 | 7.42265  | 7.37115 | 0.248621 | 0.318166 | 1.158935 | 0.513478 | 0.583642 | 1.064075 |
| OID30670 | TXN                | Inflammat<br>ion_II | 5.01285 | 5.6418   | 5.2276  | 0.000126 | 0.000502 | 1.760945 | 0.021343 | 0.041922 | 1.181566 |
| OID30671 | CGB3_CG<br>B5_CGB8 | Inflammat<br>ion_II | 4.51605 | 2.53785  | 2.74135 | 0.007315 | 0.015626 | -1.8551  | 0.00041  | 0.001717 | -2.27995 |
| OID30672 | RNASE1             | Inflammat<br>ion_II | 3.0689  | 5.29865  | 4.97265 | 3.52E-06 | 3.51E-05 | 4.019873 | 1.22E-05 | 0.000117 | 4.115592 |
| OID30674 | NRGN               | Inflammat<br>ion_II | 1.00265 | 1.3865   | 1.03975 | 0.085865 | 0.12858  | 1.028648 | 0.567522 | 0.635209 | 1.016845 |
| OID30675 | ABO                | Inflammat<br>ion_II | 3.50005 | 3.0889   | 3.0667  | 0.169536 | 0.231819 | -1.35411 | 0.064465 | 0.104863 | -1.41025 |
| OID30676 | PI16               | Inflammat<br>ion_II | 1.23595 | 2.0206   | 1.9862  | 4.46E-06 | 4.05E-05 | 1.911096 | 1.26E-05 | 0.000119 | 1.842545 |
| OID30677 | LCAT               | Inflammat<br>ion_II | 0.2083  | -0.48175 | -0.3401 | 0.000441 | 0.00145  | -1.50927 | 0.013627 | 0.029454 | -1.26313 |
| OID30678 | NEXN               | Inflammat<br>ion_II | 0.5921  | 1.30425  | 1.14845 | 0.00027  | 0.000948 | 1.846445 | 0.001033 | 0.003495 | 1.644558 |
| OID30679 | ASGR2              | Inflammat<br>ion_II | 2.66535 | 1.28075  | 1.30705 | 1.65E-07 | 5.23E-06 | -2.69746 | 7.61E-05 | 0.00044  | -2.07527 |
| OID30680 | GPI                | Inflammat<br>ion_II | 6.2055  | 6.6561   | 6.4781  | 6.93E-05 | 0.000302 | 1.383814 | 0.005454 | 0.013894 | 1.448239 |
| OID30681 | CSF1R              | Inflammat<br>ion_II | 4.2377  | 4.6164   | 4.59625 | 0.021652 | 0.039889 | 1.240696 | 0.112731 | 0.169327 | 1.209156 |
| OID30683 | SOD3               | Inflammat<br>ion_II | 4.4333  | 5.9661   | 6.00705 | 7.03E-07 | 1.25E-05 | 3.316818 | 1.26E-06 | 2.51E-05 | 3.622034 |
| OID30684 | F10                | Inflammat<br>ion_II | 1.3661  | 1.6038   | 1.56785 | 0.921974 | 0.933881 | 1.092513 | 0.336103 | 0.418414 | 1.174503 |
| OID30685 | SHBG               | Inflammat<br>ion_II | 1.7073  | 1.8606   | 1.70365 | 0.054314 | 0.085809 | -1.27143 | 0.391942 | 0.470845 | 1.073856 |
| OID30686 | APOA2              | Inflammat<br>ion_II | -2.9282 | -2.69755 | -2.865  | 0.492363 | 0.566089 | -1.08798 | 0.781844 | 0.827878 | 1.034404 |

|          |        |                     |          |          |          |          |          |          |          |          |          |
|----------|--------|---------------------|----------|----------|----------|----------|----------|----------|----------|----------|----------|
| OID30687 | TCN1   | Inflammat<br>ion_II | 5.0403   | 4.82625  | 4.7858   | 0.40707  | 0.481409 | 1.002672 | 0.395867 | 0.474522 | -1.10168 |
| OID30688 | PEPD   | Inflammat<br>ion_II | 3.27965  | 3.53645  | 3.6937   | 0.085833 | 0.12858  | 1.273633 | 0.07592  | 0.119943 | 1.143138 |
| OID30689 | RNASE6 | Inflammat<br>ion_II | 8.2307   | 8.66345  | 8.93555  | 2.66E-06 | 2.86E-05 | 1.424346 | 1.41E-06 | 2.71E-05 | 1.529966 |
| OID30690 | FCN1   | Inflammat<br>ion_II | -3.37545 | -4.29525 | -3.04155 | 0.648703 | 0.709939 | -2.17943 | 0.250663 | 0.325713 | -1.28886 |
| OID30691 | TGOLN2 | Inflammat<br>ion_II | 4.33885  | 4.96815  | 4.8483   | 0.000276 | 0.00096  | 1.602862 | 0.001359 | 0.00439  | 1.689504 |
| OID30692 | VASP   | Inflammat<br>ion_II | -0.26015 | 0.0077   | -0.06455 | 0.046312 | 0.075791 | 1.1776   | 0.060309 | 0.09928  | 1.011783 |
| OID30693 | PNLIP  | Inflammat<br>ion_II | 2.9978   | 2.3188   | 2.53925  | 0.000538 | 0.001722 | -1.60103 | 0.048741 | 0.082334 | -1.2485  |
| OID30694 | MRC1   | Inflammat<br>ion_II | 3.218    | 3.4426   | 3.4552   | 0.016212 | 0.031011 | 1.405857 | 0.024485 | 0.046514 | 1.16538  |
| OID30696 | ACE    | Inflammat<br>ion_II | 3.8301   | 3.8656   | 3.8009   | 0.973669 | 0.976336 | -1.00166 | 0.983867 | 0.987464 | -1.00692 |
| OID30697 | CR1    | Inflammat<br>ion_II | 0.6946   | 0.67095  | 0.74275  | 0.554059 | 0.623317 | -1.06925 | 0.383168 | 0.462328 | 1.078181 |
| OID30698 | C9     | Inflammat<br>ion_II | 1.595    | 2.0421   | 2.6594   | 0.505953 | 0.579287 | 1.413675 | 0.01384  | 0.029622 | 1.687632 |
| OID30699 | PGA4   | Inflammat<br>ion_II | 4.37665  | 4.12005  | 4.4284   | 0.191221 | 0.256363 | -1.14572 | 0.26632  | 0.344023 | 1.008178 |
| OID30700 | GSR    | Inflammat<br>ion_II | 3.7806   | 4.4051   | 4.45575  | 2.86E-05 | 0.000149 | 1.671334 | 0.003156 | 0.008751 | 1.399877 |
| OID30701 | APOF   | Inflammat<br>ion_II | -1.2824  | -2.7079  | -2.1926  | 0.009325 | 0.019103 | -1.47903 | 0.321839 | 0.405716 | -1.21008 |
| OID30702 | FGL1   | Inflammat<br>ion_II | -2.97685 | -2.9969  | -3.23845 | 0.390925 | 0.46656  | -1.19823 | 0.256811 | 0.332522 | -1.16866 |
| OID30703 | DBH    | Inflammat<br>ion_II | -0.2963  | 0.54545  | 0.8353   | 0.000686 | 0.002075 | 1.819006 | 0.000309 | 0.001369 | 1.724765 |

|          |                           |                 |          |         |         |          |          |          |          |          |          |
|----------|---------------------------|-----------------|----------|---------|---------|----------|----------|----------|----------|----------|----------|
| OID30704 | PON1                      | Inflammation_II | -0.17125 | -0.2547 | -0.2148 | 0.857083 | 0.885303 | 1.011468 | 0.183122 | 0.252281 | 1.110878 |
| OID30705 | RNASE4                    | Inflammation_II | 4.0091   | 4.14805 | 4.38535 | 0.592314 | 0.657594 | 1.134652 | 0.489146 | 0.564755 | 1.297334 |
| OID30706 | AHSG                      | Inflammation_II | 0.5989   | 1.45195 | 1.3854  | 0.01562  | 0.030036 | 1.700725 | 0.01603  | 0.033085 | 1.724885 |
| OID30707 | AMY1A_A<br>MY1B_A<br>MY1C | Inflammation_II | 4.34595  | 4.50845 | 4.44505 | 0.488035 | 0.56229  | -1.04073 | 0.490185 | 0.564767 | 1.053325 |
| OID30708 | APOL1                     | Inflammation_II | -4.21585 | -4.7216 | -4.737  | 0.000141 | 0.000544 | -1.85221 | 0.024323 | 0.046363 | -1.43779 |
| OID30709 | AGT                       | Inflammation_II | 0.51455  | 1.06315 | 1.26485 | 0.015035 | 0.029014 | 1.309395 | 0.009131 | 0.021018 | 1.475905 |
| OID30710 | CTBS                      | Inflammation_II | 4.9689   | 5.45765 | 5.72825 | 0.000306 | 0.001036 | 1.628507 | 0.000689 | 0.002547 | 1.866842 |
| OID30711 | VNN1                      | Inflammation_II | 2.1588   | 2.6093  | 2.5854  | 0.046579 | 0.076107 | 1.269579 | 0.007069 | 0.01721  | 1.482621 |
| OID30712 | CAT                       | Inflammation_II | 0.4906   | 1.2862  | 1.102   | 0.012641 | 0.025329 | 1.573907 | 0.110966 | 0.166904 | 1.3764   |
| OID30713 | MST1                      | Inflammation_II | 1.67685  | 1.5732  | 1.80795 | 0.323432 | 0.394587 | -1.07449 | 0.843679 | 0.879733 | 1.117248 |
| OID30714 | GSN                       | Inflammation_II | 1.3843   | 1.20555 | 1.3051  | 0.516259 | 0.589244 | -1.10623 | 0.539346 | 0.611147 | 1.005212 |
| OID30715 | CRISP3                    | Inflammation_II | 0.69045  | 1.6452  | 1.6972  | 0.014626 | 0.028324 | 1.741765 | 0.067773 | 0.108794 | 2.217448 |
| OID30716 | CFHR5                     | Inflammation_II | -1.19015 | -2.2878 | -2.0146 | 0.000241 | 0.000866 | -2.53178 | 0.001859 | 0.00567  | -2.23101 |
| OID30717 | BCHE                      | Inflammation_II | 1.8851   | 1.70915 | 1.9003  | 0.655178 | 0.712969 | -1.0279  | 0.836074 | 0.872633 | 1.005038 |
| OID30718 | HGFAC                     | Inflammation_II | 0.8557   | 1.39775 | 1.33855 | 0.000304 | 0.001036 | 1.296435 | 9.14E-05 | 0.000503 | 1.397502 |

|          |          |                     |         |         |         |          |          |          |          |          |          |
|----------|----------|---------------------|---------|---------|---------|----------|----------|----------|----------|----------|----------|
| OID30719 | C8B      | Inflammat<br>ion_II | 4.92    | 5.7457  | 5.86875 | 0.046222 | 0.075791 | 1.523881 | 0.018305 | 0.036947 | 1.617146 |
| OID30720 | CFHR2    | Inflammat<br>ion_II | 8.1911  | 8.94265 | 8.7562  | 0.000956 | 0.002771 | 1.442779 | 0.001207 | 0.003968 | 1.646954 |
| OID30721 | C1RL     | Inflammat<br>ion_II | 7.5192  | 7.8596  | 8.0802  | 0.744873 | 0.793278 | 1.201678 | 0.130473 | 0.190528 | 1.210791 |
| OID30722 | ITIH1    | Inflammat<br>ion_II | 5.65505 | 6.25015 | 6.27345 | 3.31E-05 | 0.000166 | 1.641085 | 1.2E-05  | 0.000116 | 1.661746 |
| OID30723 | F2       | Inflammat<br>ion_II | 2.95335 | 3.9319  | 4.04825 | 4.11E-05 | 0.000195 | 1.970484 | 3.95E-05 | 0.000263 | 1.96149  |
| OID30724 | SERPINA7 | Inflammat<br>ion_II | 7.4142  | 8.39515 | 8.60835 | 8.37E-06 | 5.89E-05 | 1.91926  | 3.13E-05 | 0.000223 | 2.05281  |
| OID30725 | B2M      | Inflammat<br>ion_II | 6.27155 | 7.67055 | 7.44825 | 7.69E-05 | 0.000332 | 2.911273 | 0.00062  | 0.002373 | 2.947312 |
| OID30726 | SAA4     | Inflammat<br>ion_II | 6.1123  | 6.726   | 6.8927  | 3.42E-05 | 0.000169 | 1.523353 | 1.96E-06 | 3.32E-05 | 1.736401 |
| OID30727 | APOE     | Inflammat<br>ion_II | 5.20535 | 7.36205 | 7.2309  | 7.95E-07 | 1.28E-05 | 4.13432  | 2.35E-06 | 3.69E-05 | 3.966867 |
| OID30728 | LYVE1    | Inflammat<br>ion_II | 7.34655 | 7.96915 | 8.13255 | 9.84E-05 | 0.000406 | 1.590136 | 0.000117 | 0.000602 | 1.818186 |
| OID30729 | QSOX1    | Inflammat<br>ion_II | 7.6191  | 8.3032  | 8.46025 | 0.020106 | 0.03759  | 1.619951 | 0.00596  | 0.014941 | 1.515612 |
| OID30730 | PZP      | Inflammat<br>ion_II | 2.48655 | 2.95125 | 3.17315 | 0.00168  | 0.004372 | 1.737003 | 0.000126 | 0.000636 | 2.047197 |
| OID30731 | C1S      | Inflammat<br>ion_II | 6.2831  | 7.50435 | 7.5971  | 1.67E-06 | 2.06E-05 | 2.375284 | 7.76E-06 | 8.6E-05  | 2.709262 |
| OID30732 | CLU      | Inflammat<br>ion_II | 3.92495 | 5.58665 | 5.8021  | 5.3E-06  | 4.62E-05 | 3.171466 | 3.82E-05 | 0.000258 | 3.479307 |
| OID30733 | APOA4    | Inflammat<br>ion_II | 5.65425 | 6.0662  | 6.1224  | 0.380873 | 0.457048 | 1.291323 | 0.059067 | 0.097821 | 1.249672 |
| OID30734 | CPB2     | Inflammat<br>ion_II | 6.30845 | 7.54815 | 7.66805 | 7.89E-07 | 1.28E-05 | 2.182906 | 2.85E-06 | 4.23E-05 | 2.499605 |

|          |          |                     |          |          |          |          |          |          |          |          |          |
|----------|----------|---------------------|----------|----------|----------|----------|----------|----------|----------|----------|----------|
| OID30735 | ATRN     | Inflammat<br>ion_II | 7.39785  | 8.0551   | 8.08395  | 0.000654 | 0.002016 | 1.597427 | 0.001765 | 0.005443 | 1.802876 |
| OID30736 | ECM1     | Inflammat<br>ion_II | 7.0941   | 7.33225  | 7.5877   | 0.316098 | 0.386929 | 1.227183 | 0.164975 | 0.230168 | 1.219255 |
| OID30737 | PROS1    | Inflammat<br>ion_II | 6.86255  | 7.35735  | 7.4334   | 0.388601 | 0.464291 | 1.278631 | 0.130489 | 0.190528 | 1.34048  |
| OID30738 | CFD      | Inflammat<br>ion_II | 7.31725  | 8.55935  | 8.64215  | 5.36E-06 | 4.63E-05 | 2.449437 | 2.17E-05 | 0.00017  | 2.668816 |
| OID30739 | F12      | Inflammat<br>ion_II | 6.36115  | 7.12405  | 7.27005  | 0.000303 | 0.001036 | 1.670697 | 0.0002   | 0.000954 | 1.574125 |
| OID30740 | IGLC2    | Inflammat<br>ion_II | 6.31975  | 7.38455  | 7.36605  | 7.88E-06 | 5.72E-05 | 1.864708 | 1.58E-05 | 0.000135 | 2.065226 |
| OID30741 | AFM      | Inflammat<br>ion_II | 5.72645  | 6.59335  | 6.79375  | 8.09E-05 | 0.000346 | 1.860577 | 9E-05    | 0.000502 | 2.117556 |
| OID30742 | PGLYRP2  | Inflammat<br>ion_II | 3.62295  | 4.52955  | 4.54915  | 0.002306 | 0.00569  | 1.889298 | 0.001041 | 0.003506 | 2.097761 |
| OID30743 | SERPINA6 | Inflammat<br>ion_II | 4.74265  | 5.92315  | 5.86445  | 1.72E-05 | 0.000101 | 2.326966 | 6.2E-05  | 0.000372 | 2.490612 |
| OID30744 | C5       | Inflammat<br>ion_II | 5.1532   | 5.68205  | 5.80695  | 0.000117 | 0.000471 | 1.596209 | 2.31E-05 | 0.000177 | 1.594053 |
| OID30745 | SELENOP  | Inflammat<br>ion_II | 6.90525  | 6.8029   | 7.00985  | 0.50141  | 0.57544  | -1.00993 | 0.889331 | 0.917749 | 1.153326 |
| OID30746 | APOD     | Inflammat<br>ion_II | 5.59645  | 6.33935  | 6.54765  | 8.29E-05 | 0.000353 | 1.674929 | 0.000344 | 0.001474 | 1.814787 |
| OID30747 | LPA      | Inflammat<br>ion_II | -1.47705 | -1.04705 | -0.57475 | 0.012902 | 0.025695 | 1.284538 | 0.007357 | 0.017754 | 1.588538 |
| OID30748 | ADIPOQ   | Inflammat<br>ion_II | 4.344    | 5.0964   | 5.45835  | 8.16E-06 | 5.78E-05 | 1.783672 | 5.36E-06 | 6.54E-05 | 1.823361 |
| OID30749 | APOC1    | Inflammat<br>ion_II | 2.21105  | 3.1054   | 3.12075  | 0.000551 | 0.001754 | 1.750843 | 9.61E-05 | 0.000517 | 1.878655 |
| OID30750 | SERPINA1 | Inflammat<br>ion_II | -0.0077  | 1.32345  | 1.30585  | 3.41E-06 | 3.44E-05 | 2.485352 | 2.11E-05 | 0.000167 | 2.57273  |



|          |          |                     |         |         |          |          |          |          |          |          |          |
|----------|----------|---------------------|---------|---------|----------|----------|----------|----------|----------|----------|----------|
| OID30751 | LRG1     | Inflammat<br>ion_II | 2.30225 | 3.63535 | 3.64675  | 1.92E-05 | 0.000111 | 2.607378 | 0.000117 | 0.000602 | 2.501598 |
| OID30752 | SELL     | Inflammat<br>ion_II | 6.78055 | 7.85255 | 7.91785  | 8.4E-07  | 1.3E-05  | 1.931404 | 1.55E-06 | 2.89E-05 | 2.239536 |
| OID30753 | C1R      | Inflammat<br>ion_II | 5.29925 | 6.58575 | 6.6755   | 6.06E-06 | 4.93E-05 | 2.365754 | 2.77E-05 | 0.000203 | 2.846522 |
| OID30754 | BTD      | Inflammat<br>ion_II | 4.3173  | 5.95055 | 5.87605  | 2.53E-06 | 2.83E-05 | 3.267755 | 1.06E-05 | 0.000105 | 3.401332 |
| OID30755 | CFB      | Inflammat<br>ion_II | 4.82225 | 6.15725 | 6.26655  | 2.6E-07  | 6.79E-06 | 2.434373 | 6.44E-07 | 1.86E-05 | 2.616068 |
| OID30756 | CLEC3B   | Inflammat<br>ion_II | 6.5119  | 7.21905 | 7.24675  | 0.008704 | 0.018135 | 1.557789 | 0.008374 | 0.019688 | 1.669019 |
| OID30757 | SERPINF1 | Inflammat<br>ion_II | 3.7767  | 5.11    | 4.90995  | 1.33E-05 | 8.48E-05 | 2.557085 | 5.81E-05 | 0.000353 | 2.562941 |
| OID30758 | CFHR4    | Inflammat<br>ion_II | 5.10995 | 4.3681  | 4.67905  | 0.00614  | 0.013271 | -1.41172 | 0.044613 | 0.076539 | -1.15081 |
| OID30759 | MBL2     | Inflammat<br>ion_II | 5.94885 | 6.37395 | 6.43645  | 0.005216 | 0.011594 | 1.394889 | 0.029486 | 0.05405  | 1.450651 |
| OID30760 | KLKB1    | Inflammat<br>ion_II | 4.83675 | 5.72045 | 5.85705  | 1.65E-06 | 2.06E-05 | 1.663532 | 1.19E-06 | 2.48E-05 | 1.90356  |
| OID30761 | PPBP     | Inflammat<br>ion_II | 5.87045 | 5.74015 | 5.82645  | 0.181444 | 0.245654 | -1.43998 | 0.289659 | 0.37025  | -1.31185 |
| OID30762 | ITIH4    | Inflammat<br>ion_II | 3.4822  | 3.93215 | 4.0339   | 0.031308 | 0.054221 | 1.253186 | 0.020044 | 0.04008  | 1.26659  |
| OID30763 | SERPINA5 | Inflammat<br>ion_II | 6.1802  | 7.35875 | 7.43585  | 5.53E-06 | 4.74E-05 | 2.24848  | 7.29E-06 | 8.34E-05 | 2.458196 |
| OID30764 | PF4      | Inflammat<br>ion_II | -0.4101 | -0.55   | -0.50355 | 0.956014 | 0.962148 | -1.47928 | 0.938398 | 0.952274 | -1.1103  |
| OID30765 | LGALS3BP | Inflammat<br>ion_II | 4.9376  | 6.47555 | 6.55705  | 9.35E-06 | 6.5E-05  | 2.337149 | 1.87E-05 | 0.000151 | 2.773101 |
| OID30766 | C7       | Inflammat<br>ion_II | 6.30895 | 7.27745 | 7.41375  | 1.56E-05 | 9.5E-05  | 1.831658 | 1.63E-05 | 0.000137 | 1.950576 |

|          |          |                     |          |         |         |          |          |          |          |          |          |
|----------|----------|---------------------|----------|---------|---------|----------|----------|----------|----------|----------|----------|
| OID30767 | SERPIND1 | Inflammat<br>ion_II | 3.7737   | 4.1817  | 4.32445 | 0.068716 | 0.10597  | 1.549551 | 0.008166 | 0.019241 | 1.331682 |
| OID30768 | ORM1     | Inflammat<br>ion_II | 0.07575  | 1.70595 | 1.66105 | 6.73E-06 | 5.2E-05  | 3.078548 | 3.65E-05 | 0.000252 | 2.702791 |
| OID30769 | APOA1    | Inflammat<br>ion_II | 2.6766   | 3.84175 | 3.9129  | 1.7E-05  | 0.000101 | 2.085148 | 4.33E-05 | 0.000285 | 2.344695 |
| OID30770 | HRG      | Inflammat<br>ion_II | 3.53935  | 5.07115 | 5.3094  | 8.02E-06 | 5.75E-05 | 2.358468 | 1.54E-05 | 0.000134 | 2.584885 |
| OID30771 | A1BG     | Inflammat<br>ion_II | 3.7678   | 4.77065 | 4.87535 | 1.75E-05 | 0.000102 | 2.231633 | 6.33E-05 | 0.000378 | 2.044503 |
| OID30772 | CFI      | Inflammat<br>ion_II | 5.53665  | 6.6334  | 6.58405 | 8.62E-05 | 0.000365 | 2.273713 | 0.000184 | 0.000888 | 2.066802 |
| OID30773 | F11      | Inflammat<br>ion_II | 5.84805  | 6.73465 | 6.8758  | 4.89E-07 | 1.03E-05 | 1.758567 | 3.01E-08 | 3.19E-06 | 1.965232 |
| OID30774 | SERPINA4 | Inflammat<br>ion_II | 3.45425  | 5.1965  | 5.01595 | 2.2E-06  | 2.58E-05 | 3.124553 | 1.93E-05 | 0.000155 | 3.172895 |
| OID30775 | CD5L     | Inflammat<br>ion_II | 4.74135  | 5.0994  | 5.30765 | 0.071876 | 0.11038  | 1.351068 | 0.124371 | 0.183548 | 1.460639 |
| OID30776 | C3       | Inflammat<br>ion_II | 1.7051   | 2.86045 | 2.7215  | 9.11E-05 | 0.000382 | 2.303456 | 0.000595 | 0.002309 | 2.022865 |
| OID30777 | SERPING1 | Inflammat<br>ion_II | 0.0637   | 1.66765 | 1.73435 | 2.02E-05 | 0.000115 | 2.868109 | 9.64E-05 | 0.000517 | 3.127912 |
| OID30778 | APCS     | Inflammat<br>ion_II | 2.66155  | 1.71635 | 2.546   | 0.053081 | 0.084345 | -1.22837 | 0.332374 | 0.416131 | -1.23478 |
| OID30779 | SERPINF2 | Inflammat<br>ion_II | 5.29035  | 6.6359  | 6.71025 | 1.51E-05 | 9.32E-05 | 2.452495 | 4.13E-05 | 0.000273 | 2.492338 |
| OID30780 | GC       | Inflammat<br>ion_II | -0.15535 | 1.48365 | 1.2456  | 9.91E-06 | 6.84E-05 | 2.908247 | 8.01E-05 | 0.000461 | 2.972033 |
| OID30781 | F13B     | Inflammat<br>ion_II | 4.72805  | 3.73305 | 4.41325 | 0.002704 | 0.006539 | -1.9373  | 0.025758 | 0.048182 | -1.26396 |
| OID30782 | TTR      | Inflammat<br>ion_II | -0.30215 | 1.86985 | 1.6858  | 3.22E-06 | 3.33E-05 | 4.081643 | 5.32E-06 | 6.54E-05 | 4.157453 |

|          |          |                     |         |         |         |          |          |          |          |          |          |
|----------|----------|---------------------|---------|---------|---------|----------|----------|----------|----------|----------|----------|
| OID30784 | CFP      | Inflammat<br>ion_II | 3.85925 | 4.77815 | 4.74225 | 5.88E-08 | 2.93E-06 | 1.643589 | 3.2E-08  | 3.19E-06 | 1.800565 |
| OID30785 | PLG      | Inflammat<br>ion_II | 2.51485 | 4.09275 | 4.08145 | 1.63E-06 | 2.06E-05 | 2.605481 | 1.37E-05 | 0.000123 | 2.678082 |
| OID30786 | SERPINA3 | Inflammat<br>ion_II | 0.33555 | 1.94225 | 1.81845 | 1.45E-05 | 9.02E-05 | 2.807819 | 4.91E-05 | 0.000312 | 2.702323 |
| OID30787 | FN1      | Inflammat<br>ion_II | 2.3007  | 3.4611  | 3.54865 | 2.92E-05 | 0.000149 | 2.489662 | 2.51E-05 | 0.000189 | 2.431337 |
| OID30788 | FGA      | Inflammat<br>ion_II | 2.9047  | 1.5603  | 2.0004  | 0.002138 | 0.005397 | -1.58058 | 0.062688 | 0.102441 | -1.87164 |
| OID30789 | SERPINC1 | Inflammat<br>ion_II | 0.44765 | 2.1224  | 1.81175 | 4.46E-06 | 4.05E-05 | 3.19264  | 3.73E-05 | 0.000254 | 3.273196 |
| OID30790 | CFH      | Inflammat<br>ion_II | 4.36005 | 5.42175 | 5.40985 | 1.95E-05 | 0.000112 | 2.269147 | 7.44E-05 | 0.000432 | 2.146297 |
